# Supplementary material
Source: PubMed Central journal article supplement (PMC5065331)
Supplement: NIHMS795012-supplement-supp_info.pdf [file NIHMS795012-supplement-supp_info.pdf]

Supplementary Table 1a | Whole genome sequence cohort information

| Ancestry | Study                                                                | Citation(s)                                                                                                                                                                                                                                                                                                                                                                                                                                                                                                                                                                                                                                                                                                                                                                                                                                                                                                                                                                              | T2D Case Ascertainment                                                                                                                                                                                                                                                                                                                                                                                                                                                                                                                                                                                                                                                                                                                                                                                  | T2D Control Ascertainment                                                                                                                                                                                                                                                                                                                                                                                                                                                                                                                                                                                                                                                                                                                                                                                                                                                                                                                                                                              | T1D and MODY exclusion criteria                                                                                                                                                                                                                                                                                              | Genotyping array                                                                      |
|----------|----------------------------------------------------------------------|------------------------------------------------------------------------------------------------------------------------------------------------------------------------------------------------------------------------------------------------------------------------------------------------------------------------------------------------------------------------------------------------------------------------------------------------------------------------------------------------------------------------------------------------------------------------------------------------------------------------------------------------------------------------------------------------------------------------------------------------------------------------------------------------------------------------------------------------------------------------------------------------------------------------------------------------------------------------------------------|---------------------------------------------------------------------------------------------------------------------------------------------------------------------------------------------------------------------------------------------------------------------------------------------------------------------------------------------------------------------------------------------------------------------------------------------------------------------------------------------------------------------------------------------------------------------------------------------------------------------------------------------------------------------------------------------------------------------------------------------------------------------------------------------------------|--------------------------------------------------------------------------------------------------------------------------------------------------------------------------------------------------------------------------------------------------------------------------------------------------------------------------------------------------------------------------------------------------------------------------------------------------------------------------------------------------------------------------------------------------------------------------------------------------------------------------------------------------------------------------------------------------------------------------------------------------------------------------------------------------------------------------------------------------------------------------------------------------------------------------------------------------------------------------------------------------------|------------------------------------------------------------------------------------------------------------------------------------------------------------------------------------------------------------------------------------------------------------------------------------------------------------------------------|---------------------------------------------------------------------------------------|
| European | Finland-United States Investigation of NIDDM Genetics (FUSION) Study | Valle, T. et al. Mapping genes for NIDDM. Design of the Finland-United States Investigation of NIDDM Genetics (FUSION) Study. <i>Diabetes Care</i> 21(6), 949-958 (1998); Scott, L. et al. A genome-wide association study of type 2 diabetes in Finns detects multiple susceptibility variants. <i>Science</i> 316(5829), 1341-1345 (2007)                                                                                                                                                                                                                                                                                                                                                                                                                                                                                                                                                                                                                                              | <ul style="list-style-type: none"> <li>- Unrelated cases selected from FUSION families and stage 2 replication</li> <li>- Samples met 1999 World Health Organization (WHO) criteria of fasting plasma glucose <math>\geq 7.0</math> mmol/l or postload glucose during an OGTT <math>\geq 11.1</math> mmol/l, by report of diabetes medication use, or based on medical record review</li> <li>- Prioritized FUSION families with <math>\geq 2</math> first-degree relatives with T2D; BMI <math>\geq 18.5</math> kg/m<sup>2</sup>; case with GWAS data or earliest age at onset, if no GWAS data available</li> <li>- Prioritized FUSION stage 2 replication set with MetaboChip data; BMI <math>\geq 18.5</math> kg/m<sup>2</sup>; earliest age of onset; age of onset <math>\leq 35</math></li> </ul> | <ul style="list-style-type: none"> <li>- Unrelated controls with normal glucose tolerance (NGT) based on WHO (1999) definitions: fasting plasma glucose <math>&lt; 6.1</math> mM and 2 hour postload glucose during an OGTT <math>&lt; 7.8</math> mM</li> <li>- Frequency matched to cases by birth province; BMI <math>\geq 18.5</math> kg/m<sup>2</sup>; age <math>\leq 80</math></li> <li>- Within each birth province, prioritized samples from stage 2 replication with highest values for age + 2*BMI</li> </ul>                                                                                                                                                                                                                                                                                                                                                                                                                                                                                 | <ul style="list-style-type: none"> <li>- When possible, we prioritized cases with age of diagnosis between 35 and 60, without history of insulin-dependent diabetes among first degree relatives, with at least one full sibling diagnosed with T2D, and with at least one parent who was apparently nondiabetic.</li> </ul> | Illumina 317K, HumanOmniExpress-12v1, and HumanExome-12v1_A                           |
| European | Kooperative Gesundheitsforschung in der Region Augsburg (KORA)       | Wichmann, H. E., Gieger, C. and Illig, T. KORA-gen—resource for population genetics, controls and a broad spectrum of disease phenotypes. <i>Gesundheitswesen</i> 67 Suppl 1, 26–30 (2005)<br>Holle R, Happlich M, Löwel H, Wichmann HE, MONICA/KORA Study Group. KORA - a research platform for population based health research. <i>Gesundheitswesen</i> . 2005 Aug; 67 Suppl 1:S19-25. PMID: 16032513                                                                                                                                                                                                                                                                                                                                                                                                                                                                                                                                                                                 | <ul style="list-style-type: none"> <li>- Samples drawn from KORA F3 and F4</li> <li>- Diabetic status validated by doctor or by medication use</li> <li>- Prioritized cases with <math>\geq 1</math> first-degree relative with T2D (self-reported) - Cases have <math>\geq 1</math> first degree relative with type 2 diabetes (self-reported)</li> <li>- Cases have either BMI <math>\leq 30</math> and age of onset <math>&lt; 65</math>, or BMI <math>\leq 33</math> and age of onset <math>\leq 60</math></li> </ul>                                                                                                                                                                                                                                                                               | <ul style="list-style-type: none"> <li>- Controls selected from KORA F4</li> <li>- All controls are normal glucose tolerant: fasting glucose level <math>&lt; 6.1</math> mmol/l and two hour glucose level after oral glucose tolerance test <math>&lt; 7.8</math> mmol/l</li> <li>- Controls are either <math>&gt; 60</math> years of age with BMI <math>&gt; 32</math> or over 65 years of age with BMI <math>&gt; 31</math></li> </ul>                                                                                                                                                                                                                                                                                                                                                                                                                                                                                                                                                              | <ul style="list-style-type: none"> <li>- None applied</li> </ul>                                                                                                                                                                                                                                                             | Illumina HumanOmniExpress-12v1, Illumina HumanOmni2.5-8, Affymetrix Axiom array       |
| European | UK Type 2 Diabetes Genetics Consortium (UKT2D)                       | Wellcome Trust Case Control Consortium. Genome-wide association study of 14,000 cases of seven common diseases and 3,000 shared controls. <i>Nature</i> 447, 661–78 (2007); Voight, B.F. et al. Twelve type 2 diabetes susceptibility loci identified through large-scale association analysis. <i>Nat. Genet.</i> 42, 579–589 (2010); Spector, T.D. and Williams, F.M. The UK Adult Twin Registry (TwinsUK). <i>Twin Res. Hum. Genet.</i> 9, 899–906 (2006)                                                                                                                                                                                                                                                                                                                                                                                                                                                                                                                             | <ul style="list-style-type: none"> <li>- Cases drawn from the Wellcome Trust Case Control Consortium (WTCCC)</li> <li>- Female samples with age of diagnosis <math>\geq 66</math> years or BMI <math>\geq 32</math> kg/m<sup>2</sup> excluded; male samples with age of diagnosis <math>\geq 62</math> years or BMI <math>\geq 31</math> kg/m<sup>2</sup> excluded</li> <li>- Remaining samples were ranked by age and BMI, and the two ranks multiplied.</li> </ul>                                                                                                                                                                                                                                                                                                                                    | <ul style="list-style-type: none"> <li>- Unrelated samples selected as controls from the Twins UK study</li> <li>- A twin pair was considered for selection if there was no recorded family history of diabetes, neither twin was ever recorded as impaired glucose tolerant (defined as fasting glucose <math>&gt; 6.1</math> mmol/l in any reading), there were available quantitative trait and genetic (GWAs) data, and no evidence of admixture in MDS analysis of GWAs data</li> <li>- From set of qualifying twin pairs, the best control twin was selected from each pair with the lowest ratio of fasting glucose level to BMI across all readings, and further prioritization of the qualifying unrelated samples involved selecting samples that had the lowest fasting glucose to (BMI * age) ratios</li> <li>- Top two principal components were used to perform pairwise sample matching between cases and possible controls, and the best control for each case was selected</li> </ul> | <ul style="list-style-type: none"> <li>- Cases having a first degree relative with type 1 diabetes, testing positive for GAD antibodies; or known to have other forms of diabetes, such as MODY, excluded</li> <li>- Controls having a first degree relative with type 1 diabetes excluded</li> </ul>                        | Affymetrix GeneChip Human Mapping 500K Array Set (cases) and Illumina 317K (controls) |
| European | Malmö-Botnia Study                                                   | Guey LT et al. Power in the phenotypic extremes: a simulation study of power in discovery and replication of rare variants. <i>Genet Epidemiol</i> 35, 236–48 (2011); Groop, L. et al. Metabolic consequences of a family history of NIDDM (the Botnia study): evidence for sex-specific parental effects. <i>Diabetes</i> 45, 1585–93 (1996); Parker, A. et al. A gene conferring susceptibility to type 2 diabetes in conjunction with obesity is located on chromosome 18p11. <i>Diabetes</i> 50, 675–80 (2001); Lyssenko, V. et al. Clinical risk factors, DNA variants, and the development of type 2 diabetes. <i>NEJM</i> 359, 2220–32 (2008); Lindholm, E., Agardh, E., Tuomi, T., Groop, L. & Agardh, C. D. Classifying diabetes according to the new WHO clinical stages. <i>Eur. J. of Epid.</i> 17, 983–9 (2001); Berglund, G. et al. Long-term outcome of the Malmö Preventive Project: Mortality and cardiovascular morbidity. <i>J. of Intern. Med.</i> 247, 19–29 (2000) | <ul style="list-style-type: none"> <li>- A liability score was generated (Guey LT et al. 2011) which measures risk to T2D in the context of three known risk factors (age at onset, BMI, and gender) in 27,500 individuals drawn from three prospective cohorts: the Malmö Preventive Project, the Scania Diabetes Registry, and the Botnia Study; only BMI and gender used to construct scores for Scania and Botnia studies</li> <li>- Early-onset cases with low BMI and older controls with high BMI were prioritized</li> </ul>                                                                                                                                                                                                                                                                    | <ul style="list-style-type: none"> <li>- Controls selected from the extreme of a liability score distribution, based upon gender, age and BMI at last follow-up visit; only BMI and gender used to construct scores for Malmö study</li> <li>- To match for ethnicity, equal numbers of controls were selected from the Botnia and Malmö studies</li> </ul>                                                                                                                                                                                                                                                                                                                                                                                                                                                                                                                                                                                                                                            | <ul style="list-style-type: none"> <li>- Diabetic individuals with age of onset <math>&lt; 35</math> years excluded</li> </ul>                                                                                                                                                                                               | Illumina HumanOmniExpress-12v1                                                        |

**Supplementary Table 1b | Whole genome sequence sample characteristics**

| Ancestry | Study                                                                | N Total | Cases  |               |                      |                                  | Controls  |               |                      |                                  |
|----------|----------------------------------------------------------------------|---------|--------|---------------|----------------------|----------------------------------|-----------|---------------|----------------------|----------------------------------|
|          |                                                                      |         | N Case | # Females (%) | Mean age (SD), years | Mean BMI (SD), kg/m <sup>2</sup> | N Control | # Females (%) | Mean age (SD), years | Mean BMI (SD), kg/m <sup>2</sup> |
| European | Finland-United States Investigation of NIDDM Genetics (FUSION) Study | 979     | 493    | 41.5          | 57.6 (7.9)           | 30.9 (5.6)                       | 486       | 45.2          | 63.0 (7.2)           | 28.0 (3.9)                       |
| European | Kooperative Gesundheitsforschung in der Region Augsburg (KORA)       | 205     | 101    | 44.5          | 61.4 (8.2)           | 28.2 (2.8)                       | 104       | 66.3          | 69.6 (5.6)           | 34.4 (3.5)                       |
| European | Malmö-Botnia Study                                                   | 829     | 410    | 51.5          | 53.8 (9.7)           | 24.2 (2.6)                       | 419       | 44.1          | 67.2 (7.7)           | 32.8 (4.0)                       |
| European | UK Type 2 Diabetes Genetics Consortium (UKT2D)                       | 644     | 322    | 46.2          | 50.1 (8.4)           | 26.6 (2.7)                       | 322       | 82.2          | 60.6 (10.0)          | 30.5 (5.8)                       |

**Supplementary Table 2 | Single-variant T2D association analysis descriptions**

| Dataset              | Statistical Test                   |                                    | Covariates                                           | Imputation     |
|----------------------|------------------------------------|------------------------------------|------------------------------------------------------|----------------|
|                      | Sample-size meta                   | Inverse variance meta              |                                                      | Quality filter |
| GoT2D sequenced      | Score                              | Firth                              | Age, sex, before/after association*, PC1, PC2        | N/A            |
| <b>GoT2D imputed</b> |                                    |                                    |                                                      |                |
| DGDG                 | Score                              | Score                              | Age, gender, PC1, PC2                                | INFO>0.4       |
| DGI                  | Score                              | Firth                              | Age, sex, BMI, 3 indicators (Malmo, Helsinki, Skara) | INFO>0.4       |
| EGCUT 370K           | LRT                                | LRT                                | Age, sex, PC1 – PC10                                 | INFO>0.4       |
| EGCUT OMNI           | LRT                                | LRT                                | Age, sex, PC1 – PC10                                 | INFO>0.4       |
| FHS (MAF>0.01 only)  | GEE (Wald)                         | GEE (Wald)                         | AGE, SEX, cohort, PC1 – PC10                         | INFO>0.4       |
| FUSION               | Score                              | Firth                              | Age (continuous), sex, 12 birth provinces            | RSQ>0.3        |
| INTERACT             | Score                              | Score                              | Sex, PC1 – PC10                                      | INFO>0.4       |
| KORA                 | Score                              | Score                              | Age, sex, PC1 – PC3                                  | INFO>0.4       |
| MSSMIPM (Affymetrix) | Score (MAC≥200)<br>Firth (MAC<200) | Score (MAC≥200)<br>Firth (MAC<200) | Age, sex, PC1 – PC5                                  | INFO>0.4       |
| MSSMIPM (Illumina)   | Score (MAC≥200)<br>Firth (MAC<200) | Score (MAC≥200)<br>Firth (MAC<200) | Age, sex, PC1 – PC4                                  | INFO>0.4       |
| PIVUS                | Score                              | Score                              | Age, sex, PC1, PC2                                   | INFO>0.4       |
| ULSAM                | Score                              | Score                              | PC1, PC2 (all males, same age)                       | INFO>0.4       |
| WTCCC                | Score                              | Score                              |                                                      | INFO>0.4       |

LRT Likelihood ratio test, GEE Generalized estimating equations.

\*Indicator function to account for observed temporal stratification based on sequencing date and center.

Supplementary Table 3a | Imputed cohort information

| Ancestry | Study                                                                   | Citation(s)                                                                                                                                                                                                                                                                                                                                                                                                                                                                                     | T2D Case Ascertainment                                                                                                                                                                                                                                                                                                                                                                                                                                                                                                                                                                           | T2D Control Ascertainment                                                                                                                                                                                                                                                                                              | T1D and MODY exclusion criteria                                                                                                                                                                                                                                                                                                                                                                                          | Genotyping array                                            |
|----------|-------------------------------------------------------------------------|-------------------------------------------------------------------------------------------------------------------------------------------------------------------------------------------------------------------------------------------------------------------------------------------------------------------------------------------------------------------------------------------------------------------------------------------------------------------------------------------------|--------------------------------------------------------------------------------------------------------------------------------------------------------------------------------------------------------------------------------------------------------------------------------------------------------------------------------------------------------------------------------------------------------------------------------------------------------------------------------------------------------------------------------------------------------------------------------------------------|------------------------------------------------------------------------------------------------------------------------------------------------------------------------------------------------------------------------------------------------------------------------------------------------------------------------|--------------------------------------------------------------------------------------------------------------------------------------------------------------------------------------------------------------------------------------------------------------------------------------------------------------------------------------------------------------------------------------------------------------------------|-------------------------------------------------------------|
| European | MT. SINAI BioMe Biobank Platform (BioMe (Afy))                          | Gottesman O, et al. The Electronic Medical Records and Genomics (eMERGE) Network: past, present and future. <i>Genet. Med.</i> 15,761-771 (2013)                                                                                                                                                                                                                                                                                                                                                | - From longitudinal EMR: random glucose $\geq$ 200 mg/dl ever, or physician-entered diagnosis ( $\geq$ 2 occurrences on 2 separate days), or T2D medication ( $\geq$ 2 occurrences on 2 separate days)<br>- Age $\geq$ 25 years                                                                                                                                                                                                                                                                                                                                                                  | - Age $\geq$ 25 years<br>- Not having T2D<br>- All available fasting glucose measurements <100 mg/dl                                                                                                                                                                                                                   | - Age $\geq$ 25 years                                                                                                                                                                                                                                                                                                                                                                                                    | Affymetrix 6.0                                              |
| European | MT. SINAI BioMe Biobank Platform (BioMe (Illumina))                     | Gottesman O, et al. The Electronic Medical Records and Genomics (eMERGE) Network: past, present and future. <i>Genet. Med.</i> 15,761-771 (2013)                                                                                                                                                                                                                                                                                                                                                | - From longitudinal EMR: random glucose $\geq$ 200 mg/dl ever, or physician-entered diagnosis ( $\geq$ 2 occurrences on 2 separate days), or T2D medication ( $\geq$ 2 occurrences on 2 separate days)<br>- Age $\geq$ 25 years                                                                                                                                                                                                                                                                                                                                                                  | - Age $\geq$ 25 years<br>- Not having T2D<br>- All available fasting glucose measurements <100 mg/dl                                                                                                                                                                                                                   | - Age $\geq$ 25 years                                                                                                                                                                                                                                                                                                                                                                                                    | Illumina OMNI ExpressExome                                  |
| European | Diabetes Gene Discovery Group (DGDG)                                    | Sladek, R. et al. A genome-wide association study identifies novel risk loci for type 2 diabetes. <i>Nature</i> 445, 881-885 (2007)                                                                                                                                                                                                                                                                                                                                                             | - 1997 American Diabetes Association (ADA) criteria<br>- Family history of diabetes in first-degree relatives<br>- BMI <30 kg/m <sup>2</sup>                                                                                                                                                                                                                                                                                                                                                                                                                                                     | - Age at examination $\geq$ 45 years<br>- Normal fasting glucose according to 1997 ADA criteria: FG <5.7 mmol/l<br>- BMI <27 kg/m <sup>2</sup>                                                                                                                                                                         | - Cases with age of diagnosis <45 years were screened for known MODY mutations<br>- Cases from the Corbeil-Essonnes Hospital tested for fasting C-peptide levels; if fasting C-peptide <0.4 mg/l, subjects tested for anti-GAD antibodies; those with anti-GAD antibodies >10U/ml excluded.<br>- 29% of cases from UMR8090 CNRS tested for anti-islet-antibodies and/or anti-insulin antibodies; positive cases excluded | Illumina Human Hap 300 Bead Array                           |
| European | Diabetes Genetics Initiative (DGI)                                      | Diabetes Genetics Initiative of Broad Institute of Harvard and MIT, Lund University, and Novartis Institutes of BioMedical Research, et al. Genome-Wide Association Analysis Identifies Loci for Type 2 Diabetes and Triglyceride Levels. <i>Science</i> 316,1331-1336 (2007)                                                                                                                                                                                                                   | - WHO (1999) criteria with fasting glucose $\geq$ 7.0 mmol/l or 2-hour glucose $\geq$ 11.1 mmol/l during an oral glucose tolerance test.<br>- Age of diagnosis $>$ 35 years                                                                                                                                                                                                                                                                                                                                                                                                                      | - No first-degree relatives with T2D                                                                                                                                                                                                                                                                                   | - Anti-GAD antibodies <32 IU/ml in the Finnish samples and <1.3 anti-GAD relative units in the Swedish samples<br>- Age of diagnosis $>$ 35 years                                                                                                                                                                                                                                                                        | Affymetrix GeneChip Human Mapping 500k Array Set            |
| European | Estonian Genome Center, University of Tartu (EGCUT-OMN)                 | Leitsalu L, et al. Cohort profile: Estonian Biobank of the Estonian genome Center, University of Tartu. <i>Int. J. Epidemiol.</i> 44, 1137-1147 (2014)                                                                                                                                                                                                                                                                                                                                          | - Standardized health examination together with questionnaires on health-related topics as described in WHO ICD-10. Data are regularly updated through linkage to national databases and registries.                                                                                                                                                                                                                                                                                                                                                                                             | - Random subset of the Estonian population                                                                                                                                                                                                                                                                             | - None applied                                                                                                                                                                                                                                                                                                                                                                                                           | Illumina OmniExpress Array                                  |
| European | Estonian Genome Center, University of Tartu (EGCUT-370)                 | Leitsalu L, et al. Cohort profile: Estonian Biobank of the Estonian genome Center, University of Tartu. <i>Int. J. Epidemiol.</i> 44, 1137-1147 (2014)                                                                                                                                                                                                                                                                                                                                          | - Standardized health examination together with questionnaires on health-related topics as described in WHO ICD-10. Data are regularly updated through linkage to national databases and registries.                                                                                                                                                                                                                                                                                                                                                                                             | - Random subset of the Estonian population                                                                                                                                                                                                                                                                             | - None applied                                                                                                                                                                                                                                                                                                                                                                                                           | Illumina HumanHap 370K Array                                |
| European | Framingham Heart Study (FHS)                                            | Dawber, TR et al. Epidemiological approaches to heart disease: the Framingham Study. <i>Am. J. Public Health Nations Health</i> 41, 279-281 (1951); Feinleib, M et al. The Framingham Offspring Study: Design and preliminary data. <i>Prev. Med.</i> 4, 518-525 (1975); Splansky, GL et al. The Third Generation Cohort of the National Heart, Lung, and Blood Institute's Framingham Heart Study: design, recruitment, and initial examination. <i>Am. J. Epidemiol.</i> 165,1328-1335 (2007) | - Gen 1 cohort: casual glucose $\geq$ 200 mg/dl or taking diabetes medication at any examination<br>- Gen 2 cohort (offspring): FCG $\geq$ 126 mg/dl or diabetes treatment at any examination<br>- Gen 3 cohort: fasting glucose $\geq$ 126 mg/dl or diabetes treatment at examination                                                                                                                                                                                                                                                                                                           | - Fasting glucose <126 mg/dl and no T2D medication at the most recent study visit                                                                                                                                                                                                                                      | - None applied                                                                                                                                                                                                                                                                                                                                                                                                           | Affymetrix GeneChip Human Mapping 500k Array Set + MIPS 50K |
| European | Finland-United States Investigation of NIDDM Genetics (FUSION) Study    | Scott, L. J. et al. (2007) A genome-wide association study of type 2 diabetes in Finns detects multiple susceptibility variants. <i>Science</i> 316, 1341-1345 (2007)                                                                                                                                                                                                                                                                                                                           | - WHO 1999 criteria of FCG $\geq$ 7.0 mmol/l or 2-hour plasma glucose $\geq$ 11.1 mmol/l or reported diabetes medication use or based on medical record review                                                                                                                                                                                                                                                                                                                                                                                                                                   | - NGT as defined by WHO 1999 criteria                                                                                                                                                                                                                                                                                  | - No known or probable type 1 diabetes among first degree relatives<br>- Insulin treatment initiated within 10 years of disease diagnosis, detectable levels of anti-GAD antibodies and fasting C-peptide $\geq$ 0.30 nmol/l<br>- Insulin treatment initiated within 4 years of diagnosis and fasting C-peptide $\geq$ 0.30 nmol/l                                                                                       | Illumina Human Hap 300 Bead Array                           |
| European | InterAct                                                                | Langenberg, C. Design and cohort description of the InterAct Project: an examination of the interaction of genetic and lifestyle factors on the incidence of type 2 diabetes in the EPIC Study. <i>Diabetologia</i> 54, 2272-2282 (2011)                                                                                                                                                                                                                                                        | - Self-report (self-reported history of T2D, doctor-diagnosed T2D, diabetes drug use) and linkage to primary care registers, secondary care registers, medication use (drug registers), hospital admissions, and mortality data, using information from any follow-up visit or external evidence with a date later than the baseline visit.<br>- In Sweden, cases ascertained via local and national diabetes and pharmaceutical registers.<br>- Centers outside Sweden required evidence of T2D from $\geq$ 2 independent sources, including individual medical records review at some centers. | - Individuals without T2D                                                                                                                                                                                                                                                                                              | - None applied                                                                                                                                                                                                                                                                                                                                                                                                           | Illumina HumanHap 660 Array                                 |
| European | KORAGEN Study Helmholtz Zentrum München (KORA)                          | Wichmann HE, Gieger C, Illig T. MONICA/KORA Study Group. <i>Gesundheitswesen</i> 67 Suppl 1, S26-30. Review (2005)                                                                                                                                                                                                                                                                                                                                                                              | - Self-report in personal interview validated by a questionnaire mailed to the treating physician and/or by medical chart review                                                                                                                                                                                                                                                                                                                                                                                                                                                                 | - Non-diabetic by self-report                                                                                                                                                                                                                                                                                          | - None applied                                                                                                                                                                                                                                                                                                                                                                                                           | Affymetrix GeneChip Human Mapping 500k Array Set            |
| European | Prospective Investigation of the Vasculature in Uppsala Seniors (PIVUS) | Lind, L. et al. A comparison of three different methods to evaluate endothelium-dependent vasodilation in the elderly: the Prospective Investigation of the Vasculature in Uppsala Seniors (PIVUS) study. <i>Arterioscler. Thromb. Vasc. Biol.</i> 25, 2368-2375 (2005)                                                                                                                                                                                                                         | - Fasting blood glucose $>$ 6.1 mmol/l or known diabetes                                                                                                                                                                                                                                                                                                                                                                                                                                                                                                                                         | - Individuals without T2D                                                                                                                                                                                                                                                                                              | - None applied                                                                                                                                                                                                                                                                                                                                                                                                           | Illumina MetaboChip and Illumina OmniExpress Array          |
| European | Uppsala Longitudinal Study of Adult Men (ULSAM)                         | Ingelsson E, et al. Insulin resistance and risk of congestive heart failure. <i>JAMA</i> 294, 334-341 (2005)                                                                                                                                                                                                                                                                                                                                                                                    | - Hospital discharge register-defined diabetes before 2002.                                                                                                                                                                                                                                                                                                                                                                                                                                                                                                                                      | - Individuals without T2D                                                                                                                                                                                                                                                                                              | - None applied                                                                                                                                                                                                                                                                                                                                                                                                           | Illumina MetaboChip and Illumina OmniExpress Array          |
| European | Welcome Trust Case Control Consortium (WTCCC)                           | Zeggini, E. et al. Meta-analysis of genome-wide association data and large-scale replication identifies additional susceptibility loci for type 2 diabetes. <i>Nat. Genet.</i> 40, 638-645 (2008)                                                                                                                                                                                                                                                                                               | - Current prescribed treatment with oral agents and/or insulin, or, for individuals treated with diet alone, laboratory evidence of hyperglycemia as defined by WHO<br>- All cases were diagnosed between ages 25 and 75 years.                                                                                                                                                                                                                                                                                                                                                                  | - Selected without reference to T2D status<br>- 1958 Birth Cohort controls of self-reported white ethnicity and representative of gender and each geographical region<br>- UK blood donor controls selected based on sex and geographical region to reproduce the distribution of the samples of the 1958 Birth Cohort | - Age of diagnosis $\geq$ 25<br>- Absence of first-degree relatives with T1D<br>- Individuals with other known forms of diabetes were excluded<br>- $\geq$ 1 year between diagnosis and institution of regular insulin therapy<br>- Negative testing for anti-GAD antibodies                                                                                                                                             | Affymetrix Human Mapping 500K Array                         |

Supplementary Table 3b | Imputed cohort sample characteristics

| Ancestry | Study                                                                   | N Total | Cases  |               |                      |                                  |                                   | Controls  |               |                      |                                  |
|----------|-------------------------------------------------------------------------|---------|--------|---------------|----------------------|----------------------------------|-----------------------------------|-----------|---------------|----------------------|----------------------------------|
|          |                                                                         |         | N Case | # Females (%) | Mean age (SD), years | Mean BMI (SD), kg/m <sup>2</sup> | Mean age of diagnosis (SD), years | N Control | # Females (%) | Mean age (SD), years | Mean BMI (SD), kg/m <sup>2</sup> |
| European | Diabetes Gene Discovery Group (DGDG)                                    | 1374    | 677    | 266 (39.3)    | 59.5 (10.0)          | 26.1 (2.7)                       | 45.4(8.3)                         | 697       | 416 (59.7)    | 53.5 (5.7)           | 23.2 (1.8)                       |
| European | Diabetes Genetics Initiative (DGI)                                      | 1956    | 899    | 419 (46.6)    | 65.3 (9.9)           | 28.1 (4.1)                       | 59.2 (10.1)                       | 1057      | 533 (49.6)    | 58.3 (9.6)           | 26.7 (3.7)                       |
| European | Estonian Genome Center, University of Tartu (EGCUT-370)                 | 1848    | 80     | 39 (48.8)     | 61.9 (11.3)          | 31.6 (4.8)                       | NA                                | 1768      | 902 (51.0)    | 39.7 (16.1)          | 25.7 (5.1)                       |
| European | Estonian Genome Center, University of Tartu (EGCUT-OMNI)                | 6402    | 389    | 228 (58.6)    | 70.2 (11.8)          | 31.1 (6.2)                       | NA                                | 6013      | 3259 (54.2)   | 50.9 (20.4)          | 26.5 (5.1)                       |
| European | Framingham Heart Study (FHS)                                            | 8333    | 673    | 287 (42.6)    | 63.7 (12.4)          | 31.4 (6.5)                       | NA                                | 7660      | 4219 (55.1)   | 52.3 (16.0)          | 27.0 (5.1)                       |
| European | Finland United States Investigation of NIDDM (FUSION) Study             | 2150    | 1060   | 457 (43.1)    | 63.0 (7.6)           | 30.3 (4.7)                       | NA                                | 1090      | 560 (51.3)    | 63.2 (7.4)           | 26.9 (3.7)                       |
| European | INTERACT                                                                | 9292    | 4624   | 2395 (51.8)   | NA                   | 30.0 (4.8)                       | NA                                | 4668      | 2995 (64.2)   | NA                   | 25.9 (4.2)                       |
| European | KORAgen Study Helmholtz zentrum München (KORA)                          | 3978    | 993    | 447(45.1)     | 60.4 (11.0)          | 31.0 (5.4)                       | NA                                | 2985      | 1558 (52.2)   | 55.6 (13.2)          | 27.3 (4.5)                       |
| European | MT. SINAI BioMe Biobank Platform (BioMe (Affy))                         | 587     | 132    | 35 (26.5)     | 66.0 (10.7)          | 31.3 (6.3)                       | NA                                | 455       | 158 (34.7)    | 66.0(10.7)           | 26.5 (5.2)                       |
| European | MT. SINAI BioMe Biobank Platform (BioMe (Illumina))                     | 1902    | 255    | 74 (29.0)     | 69.1 (9.0)           | 30.7 (6.2)                       | NA                                | 1647      | 846 (51.4)    | 69.1 (9.0)           | 26.3 (5.0)                       |
| European | Prospective Investigation of the Vasculature in Uppsala Seniors (PIVUS) | 949     | 111    | 46 (41.4)     | 70.2 (0.1)           | 29.1 (5.3)                       | NA                                | 838       | 492 (51.2)    | 70.2 (0.2)           | 26.8 (4.2)                       |
| European | Uppsala Longitudinal Study of Adult Men (ULSAM)                         | 1119    | 166    | 0             | 71.0 (0.7)           | 27.9 (3.9)                       | NA                                | 953       | 0             | 71.0(0.6)            | 26.0(3.2)                        |
| European | Welcome Trust Case Control Consortium (WTCCC)                           | 4524    | 1586   | 649 (40.9)    | 58.3 (10.1)          | 32.2 (6.2)                       | 49.0 (11.9)                       | 2938      | 1492 (50.8)   | 43.3 (12.3)          | 28.2 (4.3)                       |

Supplementary Table 4a | Exome sequence cohort information

| Ancestry         | Study                                                                                            | Citation(s)                                                                                                                                                                                                                                                                                                                                                                                                                                                                                                                                                                                                                                                       | T2D Case Ascertainment                                                                                                                                                                                                                                                                                                                                                                                                                                                                                                                                                                                                                                                                                                                                                                                                                                                                                                                                                                                                                                                                                                                                                                                                                                                                                                                                                                                                                                                                                                                                                                         | T2D Control Ascertainment                                                                                                                                                                                                                                                                                                                                                                                                                                                                                                                                                                                                                                                                                                                                                                                                                                                                                                                                                               | T1D and MODY exclusion criteria                                                                                                                                                                                                                                                                                              | Genotyping array                                                                      |
|------------------|--------------------------------------------------------------------------------------------------|-------------------------------------------------------------------------------------------------------------------------------------------------------------------------------------------------------------------------------------------------------------------------------------------------------------------------------------------------------------------------------------------------------------------------------------------------------------------------------------------------------------------------------------------------------------------------------------------------------------------------------------------------------------------|------------------------------------------------------------------------------------------------------------------------------------------------------------------------------------------------------------------------------------------------------------------------------------------------------------------------------------------------------------------------------------------------------------------------------------------------------------------------------------------------------------------------------------------------------------------------------------------------------------------------------------------------------------------------------------------------------------------------------------------------------------------------------------------------------------------------------------------------------------------------------------------------------------------------------------------------------------------------------------------------------------------------------------------------------------------------------------------------------------------------------------------------------------------------------------------------------------------------------------------------------------------------------------------------------------------------------------------------------------------------------------------------------------------------------------------------------------------------------------------------------------------------------------------------------------------------------------------------|-----------------------------------------------------------------------------------------------------------------------------------------------------------------------------------------------------------------------------------------------------------------------------------------------------------------------------------------------------------------------------------------------------------------------------------------------------------------------------------------------------------------------------------------------------------------------------------------------------------------------------------------------------------------------------------------------------------------------------------------------------------------------------------------------------------------------------------------------------------------------------------------------------------------------------------------------------------------------------------------|------------------------------------------------------------------------------------------------------------------------------------------------------------------------------------------------------------------------------------------------------------------------------------------------------------------------------|---------------------------------------------------------------------------------------|
| African American | Jackson Heart Study (AJ)                                                                         | Taylor, H. A. et al. Toward resolution of cardiovascular health disparities in African Americans: design and methods of the Jackson Heart Study. <i>Ethn Dis</i> 15, S6–4 (2005)                                                                                                                                                                                                                                                                                                                                                                                                                                                                                  | <ul style="list-style-type: none"> <li>- Genomic DNA from blood and genome-wide genotypes available (minimum 25 ug DNA remaining)</li> <li>- Non-related individuals based on family IDs</li> <li>- ADA 2004 definition of T2D diagnosed either of two exams</li> </ul>                                                                                                                                                                                                                                                                                                                                                                                                                                                                                                                                                                                                                                                                                                                                                                                                                                                                                                                                                                                                                                                                                                                                                                                                                                                                                                                        | <ul style="list-style-type: none"> <li>- No T2D by ADA 2004 definition, fasting plasma glucose &lt;100 mg/dL and HbA1c &lt;6% at each of two exams</li> <li>- Controls were matched to cases in a two-stage approach:                             <ol style="list-style-type: none"> <li>1. Strong matches (greedy algorithm): age &gt; 50, sex match, BMI within 1 unit, and age within 5 years (N=457 matched pairs)</li> <li>2. Closest available matches: sex match and BMI &gt; 25; for females, BMI within 5 units and age within 20 years; for males, BMI within 8 units and age within 25 years (N=117 matched pairs)</li> </ol> </li> </ul>                                                                                                                                                                                                                                                                                                                                    | <ul style="list-style-type: none"> <li>- Samples with age of onset &lt;16 years and treated only with insulin were excluded</li> </ul>                                                                                                                                                                                       | Affymetrix Genome-Wide Human SNP Array 6.0                                            |
| African American | Wake Forest School of Medicine Study (AW)                                                        | Palmer, N. D. et al. A genome-wide association search for type 2 diabetes genes in African Americans. <i>PLoS One</i> 7, e29202 (2012)                                                                                                                                                                                                                                                                                                                                                                                                                                                                                                                            | <ul style="list-style-type: none"> <li>- Cases are self-reported diabetics with diabetic nephropathy, recruited from dialysis clinics</li> <li>- Age of onset ≥25</li> <li>- Individuals excluded if at any point after diagnosis treatment consisted of insulin therapy alone</li> <li>- Additionally, at least one of the following three criteria met for inclusion: a) T2D diagnosed at least 5 years before initiating renal replacement therapy, b) background or greater diabetic retinopathy, and c) ≥100 mg/dl proteinuria on urinalysis in the absence of other causes of nephropathy</li> </ul>                                                                                                                                                                                                                                                                                                                                                                                                                                                                                                                                                                                                                                                                                                                                                                                                                                                                                                                                                                                     | <ul style="list-style-type: none"> <li>- No current diagnosis of diabetes or renal disease</li> <li>- Individuals recruited from community and internal medicine clinics</li> </ul>                                                                                                                                                                                                                                                                                                                                                                                                                                                                                                                                                                                                                                                                                                                                                                                                     | <ul style="list-style-type: none"> <li>- Type 1 diabetes is uncommon in African Americans, so no ICA tests have been performed</li> <li>- Age of onset ≥25</li> <li>- Individuals excluded if at any point after diagnosis treatment consisted of insulin therapy alone</li> </ul>                                           | Affymetrix Genome-Wide Human SNP Array 6.0                                            |
| East Asian       | Korea Association Research Project [Korean] (EK)                                                 | Cho, Y. S. et al. A large-scale genome-wide association study of Asian populations uncovers genetic factors influencing eight quantitative traits. <i>Nat. Genet.</i> 41, 527–534 (2009)                                                                                                                                                                                                                                                                                                                                                                                                                                                                          | <ul style="list-style-type: none"> <li>- Past history of T2D</li> <li>- Use of T2D medication</li> <li>- Fasting plasma glucose ≥7 mmol/l or plasma glucose ≥11.1 mmol/l 2 hours after ingestion of 75gm oral glucose load</li> <li>- Age of disease onset ≥40 years</li> <li>- Participants with early onset and family history prioritized</li> </ul>                                                                                                                                                                                                                                                                                                                                                                                                                                                                                                                                                                                                                                                                                                                                                                                                                                                                                                                                                                                                                                                                                                                                                                                                                                        | <ul style="list-style-type: none"> <li>- No past history of diabetes</li> <li>- No anti-diabetic medication</li> <li>- Fasting plasma glucose &lt;5.6 mmol/l and plasma glucose 2 hours after ingestion of 75g oral glucose load &lt;7.8 mmol/l at both baseline and follow up timepoints</li> <li>- Older subjects with normal glucose prioritized</li> </ul>                                                                                                                                                                                                                                                                                                                                                                                                                                                                                                                                                                                                                          | <ul style="list-style-type: none"> <li>- Samples with age of diagnosis &lt;40 excluded</li> </ul>                                                                                                                                                                                                                            | Affymetrix Genome-Wide Human SNP Array 5.0                                            |
| East Asian       | Singapore Diabetes Cohort Study and Singapore Prospective Study Program [Singapore Chinese] (ES) | Sim, X. et al. Transferability of type 2 diabetes implicated loci in multi-ethnic cohorts from Southeast Asia. <i>PLoS Genet.</i> 7(4), e1001363 (2011)                                                                                                                                                                                                                                                                                                                                                                                                                                                                                                           | <ul style="list-style-type: none"> <li>- Clinically ascertained T2D from primary care clinics</li> <li>- Individuals with early age of diagnosis and with at least one first degree relative with T2D were preferentially selected</li> </ul>                                                                                                                                                                                                                                                                                                                                                                                                                                                                                                                                                                                                                                                                                                                                                                                                                                                                                                                                                                                                                                                                                                                                                                                                                                                                                                                                                  | <ul style="list-style-type: none"> <li>- Fasting blood glucose &lt;6 mmol/l</li> <li>- No personal history of diabetes</li> <li>- No anti-diabetic medication</li> <li>- Older controls preferentially selected</li> </ul>                                                                                                                                                                                                                                                                                                                                                                                                                                                                                                                                                                                                                                                                                                                                                              | <ul style="list-style-type: none"> <li>- Clinical records were extracted from primary care clinics, and suspected T1D and MODY cases were excluded</li> </ul>                                                                                                                                                                | Illumina Human610-Quad BeadChip / Illumina Human1M-Duo v3.0                           |
| European         | Ashkenazi (JA)                                                                                   | Atzmon, G. et al. Lipoprotein genotype and conserved pathway for exceptional longevity in humans. <i>PLoS Biol.</i> 4(4), e113 (2006); Atzmon, G. et al. Evolution in health and medicine Sackler colloquium: Genetic variation in human telomerase is associated with telomere length in Ashkenazi centenarians. <i>Proc Natl Acad Sci U S A</i> . 107 (Suppl 1), 1710–1717 (2010); Permut, M. A. et al. A genome scan for type 2 diabetes susceptibility loci in a genetically isolated population. <i>Diabetes</i> 50(3), 681–685 (2001); Blech et al. Predicting diabetic nephropathy using multifactorial genetic model. <i>PLoS One</i> 6(4), e18743 (2011) | <ul style="list-style-type: none"> <li>- Ashkenazi Jewish origin, defined as having all four grandparents born in Northern or Eastern Europe; subjects with known or suspected Sephardic Jewish or non-Jewish ancestry excluded</li> <li>- T2D defined according to the World Health Organization criteria (fasting glucose &gt;140 mg/dl on two or more occasions or random glucose &gt;200mg/dl)</li> <li>- To avoid late-onset T1D, patients who became insulin-dependent within 2 years of diagnosis excluded; anti-GAD or anti-islet cell antibody titers not routinely measured</li> <li>- T2D cases were selected from two separate DNA collections:                             <ol style="list-style-type: none"> <li>1. Genome-wide, affected-sibling-pair linkage study (Permut et al. <i>Diabetes</i> 2001). Families in which both parents were known to have diabetes were excluded. One affected individual selected from each family and, wherever possible, sibling with youngest age of diagnosis selected.</li> <li>2. Study to determine genetic risk for diabetic complications (Blech et al. <i>PLoS One</i> 2011). Patients ascertained by the Israel Diabetes Research Group between 2002 and 2004 from 15 diabetes clinics throughout Israel. Primary selection criteria: (1) known T1D or T2D for more than 10 years, (2) 4 grandparents being either Ashkenazi or Sephardic-North African Jewish. For this study, only T2D patients with all 4 grandparents of Ashkenazi Jewish origin and age of diagnosis between 35 and 60 were selected.</li> </ol> </li> </ul> | <ul style="list-style-type: none"> <li>- Fasting blood glucose &lt;7 mmol/l</li> <li>- No personal history of diabetes</li> <li>- No anti-diabetic medications</li> </ul>                                                                                                                                                                                                                                                                                                                                                                                                                                                                                                                                                                                                                                                                                                                                                                                                               | <ul style="list-style-type: none"> <li>- Patients who became insulin-dependent within 2 years of diagnosis excluded</li> </ul>                                                                                                                                                                                               | Illumina Cardio-Metabo Chip                                                           |
| European         | Metabolic Syndrome in Men Study [Finnish] (UM)                                                   | Stancakova, A. et al. Changes in insulin sensitivity and insulin release in relation to glycemia and glucose tolerance in 6,414 Finnish men. <i>Diabetes</i> 58, 1212–1221 (2009)                                                                                                                                                                                                                                                                                                                                                                                                                                                                                 | <ul style="list-style-type: none"> <li>- Previous diagnosis of T2D, or both fasting and 2-hr criteria met for new T2D diagnosis</li> <li>- C-peptide &gt;0.10 nmol/L</li> <li>- Anti-GAD antibody &lt;50 U/mL to rule out T1D</li> <li>- Family history of diabetes (parents, sibs, children, grandparents, avuncular, cousins)</li> <li>- Unrelated individuals based on family ID and IBS analyses</li> <li>- Preferentially select individuals with genotype data (N=494), as well as non-genotyped individuals with earlier possible age of diagnosis (N=26)</li> </ul>                                                                                                                                                                                                                                                                                                                                                                                                                                                                                                                                                                                                                                                                                                                                                                                                                                                                                                                                                                                                                    | <ul style="list-style-type: none"> <li>- Normal glucose tolerance at baseline and follow-up visits</li> <li>- Prioritized samples with no family history of diabetes and meeting strict NGT criteria: fasting glucose &lt;5.8 mmol/l and 2 hour post-challenge glucose &lt;7.8 mmol/l</li> <li>- Additional samples selected with fasting glucose &lt;6.1 mmol/l and 2 hour post-challenge glucose &lt;7.8 mmol/l</li> <li>- Unrelated samples</li> <li>- Older controls preferentially selected</li> </ul>                                                                                                                                                                                                                                                                                                                                                                                                                                                                             | <ul style="list-style-type: none"> <li>- C-peptide &lt;0.10 nmol/L</li> <li>- Anti-GAD antibody &gt;50 U/mL</li> </ul>                                                                                                                                                                                                       | Illumina Cardio-Metabo Chip and HumanOmniExpress-12v1                                 |
| European         | Finland-United States Investigation of NIDDM Genetics (FUSION) Study [Finnish]                   | Valle, T. et al. Mapping genes for NIDDM. Design of the Finland-United States Investigation of NIDDM Genetics (FUSION) Study. <i>Diabetes Care</i> 21(8), 949–958 (1998); Scott, L. et al. A genome-wide association study of type 2 diabetes in Finns detects multiple susceptibility variants. <i>Science</i> 316(5829), 1341–1345 (2007)                                                                                                                                                                                                                                                                                                                       | <ul style="list-style-type: none"> <li>- Unrelated cases selected from FUSION families and stage 2 replication</li> <li>- Samples met 1999 World Health Organization (WHO) criteria of fasting plasma glucose ≥7.0 mmol/l or postload glucose during an OGTT ≥11.1 mmol/l, by report of diabetes medication use, or based on medical record review</li> <li>- Prioritized FUSION families with ≥2 first-degree relatives with T2D; BMI ≥18.5kg/m<sup>2</sup>; case with GWAS data or earliest age at onset, if no GWAS data available</li> <li>- Prioritized FUSION stage 2 replication set with MetaboChip; BMI ≥18.5kg/m<sup>2</sup>; earliest age of onset; age of onset ≥35</li> </ul>                                                                                                                                                                                                                                                                                                                                                                                                                                                                                                                                                                                                                                                                                                                                                                                                                                                                                                     | <ul style="list-style-type: none"> <li>- Unrelated controls with normal glucose tolerance (NGT) based on WHO (1999) definitions: fasting plasma glucose &lt;6.1 mM and 2 hour postload glucose during an OGTT &lt;7.8 mM</li> <li>- Frequency matched to cases by birth province; BMI ≥18.5kg/m<sup>2</sup>; age ≥50</li> <li>- Within each birth province, prioritized samples from stage 2 replication with highest values for age + 2*BMI</li> </ul>                                                                                                                                                                                                                                                                                                                                                                                                                                                                                                                                 | <ul style="list-style-type: none"> <li>- When possible, we prioritized cases with age of diagnosis between 35 and 60, without history of insulin-dependent diabetes among first degree relatives, with at least one full sibling diagnosed with T2D, and with at least one parent who was apparently nondiabetic.</li> </ul> | Illumina 317K, HumanOmniExpress-12v1, and HumanExome-12v1_A                           |
| European         | KORA [German]                                                                                    | Wichmann, H. E., Gleiger, C. and Illig, T. KORA-gen—resource for population genetics, controls and a broad spectrum of disease phenotypes. <i>Gesundheitswesen</i> 67 Suppl 1, 26–30 (2005)<br>Holle R, Happich M, Lowel H, Wichmann HE, MONICA/KORA Study Group. KORA - a research platform for population based health research. <i>Gesundheitswesen</i> . 2005 Aug; 67 Suppl 1:S19-25. PMID: 16032513                                                                                                                                                                                                                                                          | <ul style="list-style-type: none"> <li>- Samples drawn from KORA F3 and F4</li> <li>- Diabetic status validated by doctor or by medication use</li> <li>- Cases have ≥1 first degree relative with type 2 diabetes (self-reported)</li> <li>- Cases have either BMI ≥30 and age of onset &lt;65, or BMI ≥33 and age of onset ≥60</li> </ul>                                                                                                                                                                                                                                                                                                                                                                                                                                                                                                                                                                                                                                                                                                                                                                                                                                                                                                                                                                                                                                                                                                                                                                                                                                                    | <ul style="list-style-type: none"> <li>- Controls selected from KORA F4</li> <li>- All controls are normal glucose tolerant: fasting glucose level &lt;6.1 mmol/l and two hour glucose level after oral glucose tolerance test &lt;7.8 mmol/l</li> <li>- Controls are either &gt;60 years of age with BMI &gt;32 or over 65 years of age with BMI &gt;31</li> </ul>                                                                                                                                                                                                                                                                                                                                                                                                                                                                                                                                                                                                                     | <ul style="list-style-type: none"> <li>- None applied</li> </ul>                                                                                                                                                                                                                                                             | Illumina HumanOmniExpress-12v1, Illumina HumanOmni2.5-8, Affymetrix Axiom array       |
| European         | UKT2D Consortium                                                                                 | Wellcome Trust Case Control Consortium. Genome-wide association study of 14,000 cases of seven common diseases and 3,000 shared controls. <i>Nature</i> 447, 661–78 (2007); Voight, B. F. et al. Twelve type 2 diabetes susceptibility loci identified through large-scale association analysis. <i>Nat. Genet.</i> 42, 579–589 (2010); Spector, T.D. and Williams, F.M. The UK Adult Twin Registry (TwinsUK). <i>Twin Res. Hum. Genet.</i> 9, 899–906 (2006)                                                                                                                                                                                                     | <ul style="list-style-type: none"> <li>- Cases drawn from the Wellcome Trust Case Control Consortium (WTCCC)</li> <li>- Female samples with age of diagnosis ≥66 years or BMI ≥32kg/m<sup>2</sup> excluded; male samples with age of diagnosis ≥62 years or BMI ≥31kg/m<sup>2</sup> excluded</li> <li>- Remaining samples were ranked by age and BMI, and the two ranks multiplied.</li> <li>- 356 samples with the lowest values for this rank multiplier were selected for initial inclusion in the study</li> </ul>                                                                                                                                                                                                                                                                                                                                                                                                                                                                                                                                                                                                                                                                                                                                                                                                                                                                                                                                                                                                                                                                         | <ul style="list-style-type: none"> <li>- Unrelated samples selected as controls from the Twins UK study</li> <li>- A twin pair was considered for selection if there was no recorded family history of diabetes, neither twin was ever recorded as impaired glucose tolerant (defined as fasting glucose &gt;6.1mmol/L in any reading), there were available quantitative trait and genetic (GWAs) data, and no evidence of admixture in MDS analysis of GWAs data</li> <li>- From set of qualifying twin pairs, the best control twin was selected from each pair with the lowest ratio of fasting glucose level to BMI across all readings, and further prioritization of the qualifying unrelated samples involved selecting samples that had the lowest fasting glucose to (BMI * age) ratios</li> <li>- Top two principal components were used to perform pairwise sample matching between cases and possible controls, and the best control for each case was selected</li> </ul> | <ul style="list-style-type: none"> <li>- Cases having a first degree relative with type 1 diabetes, testing positive for GAD antibodies; or known to have other forms of diabetes, such as MODY, excluded</li> <li>- Controls having a first degree relative with type 1 diabetes excluded</li> </ul>                        | Affymetrix GeneChip Human Mapping 500K Array Set (cases) and Illumina 317K (controls) |

|             |                                                                                                                                                                                                                                                                         |                                                                                                                                                                                                                                                                                                                                                                                                                                                                                                                                                                                                                                                                                                                                                                                                                                                                                                                                                                                          |                                                                                                                                                                                                                                                                                                                                                                                                                                                                                                                                                                                                                                                                               |                                                                                                                                                                                                                                                                                                                                                                                                                                                                                                              |                                                                             |                                            |
|-------------|-------------------------------------------------------------------------------------------------------------------------------------------------------------------------------------------------------------------------------------------------------------------------|------------------------------------------------------------------------------------------------------------------------------------------------------------------------------------------------------------------------------------------------------------------------------------------------------------------------------------------------------------------------------------------------------------------------------------------------------------------------------------------------------------------------------------------------------------------------------------------------------------------------------------------------------------------------------------------------------------------------------------------------------------------------------------------------------------------------------------------------------------------------------------------------------------------------------------------------------------------------------------------|-------------------------------------------------------------------------------------------------------------------------------------------------------------------------------------------------------------------------------------------------------------------------------------------------------------------------------------------------------------------------------------------------------------------------------------------------------------------------------------------------------------------------------------------------------------------------------------------------------------------------------------------------------------------------------|--------------------------------------------------------------------------------------------------------------------------------------------------------------------------------------------------------------------------------------------------------------------------------------------------------------------------------------------------------------------------------------------------------------------------------------------------------------------------------------------------------------|-----------------------------------------------------------------------------|--------------------------------------------|
| European    | Malmö-Botnia Study [Finnish, Swedish]                                                                                                                                                                                                                                   | Guey LT et al. Power in the phenotypic extremes: a simulation study of power in discovery and replication of rare variants. <i>Genet Epidemiol</i> 35, 236–46 (2011); Groop, L. et al. Metabolic consequences of a family history of NIDDM (the Botnia study): evidence for sex-specific parental effects. <i>Diabetes</i> 45, 1585–93 (1996); Parker, A. et al. A gene conferring susceptibility to type 2 diabetes in conjunction with obesity is located on chromosome 19p11. <i>Diabetes</i> 50, 675–80 (2001); Lyssenko, V. et al. Clinical risk factors, DNA variants, and the development of type 2 diabetes. <i>NEJM</i> 359, 2220–32 (2008); Lindholm, E., Agardh, E., Tuomi, T., Groop, L. & Agardh, C. D. Classifying diabetes according to the new WHO clinical stages. <i>Eur. J. of Epid.</i> 17, 983–9 (2001); Berglund, G. et al. Long-term outcome of the Malmö Preventive Project: Mortality and cardiovascular morbidity. <i>J. of Intern. Med.</i> 247, 19–29 (2000) | - A liability score was generated (Guey LT et al. 2011) which measures risk to T2D in the context of three known risk factors (age at onset, BMI, and gender) in 27,500 individuals drawn from three prospective cohorts: the Malmö Preventive Project, the Scania Diabetes Registry, and the Botnia Study; only BMI and gender used to construct scores for Scania and Botnia studies<br>- Eligible cases limited to individuals between 35 and 60 years of age and with a BMI between 20 and 35<br>- To match for ethnicity, 250 Botnia cases with the most extreme liability scores were selected, while 125 cases were selected from each of the Scania and Malmö studies | - Controls selected from the extreme of a liability score distribution, based upon gender, age and BMI at last follow-up visit; only BMI and gender used to construct scores for Malmö study<br>- Eligible controls limited to individuals above 35 years of age at follow-up and with a BMI between 20 and 40<br>- To match for ethnicity, equal numbers of controls were selected from the Botnia and Malmö studies                                                                                        | - Diabetic individuals with age of onset <35 years excluded                 | Illumina HumanOmniExpress-12v1             |
| Hispanic    | San Antonio Mexican American Family Studies: San Antonio Family Heart Study, San Antonio Family Diabetes/Gallbladder Study, Veterans Administration Genetic Epidemiology Study, and Family Investigation of Nephropathy and Diabetes Study - San Antonio Component (HA) | Mitchell, B. D. et al. Genetic and environmental contributions to cardiovascular risk factors in Mexican Americans. <i>The San Antonio Family Heart Study. Circulation</i> 94, 2159–2170 (1996); Hunt, K. J. et al. Genome-wide linkage analyses of type 2 diabetes in Mexican Americans: the San Antonio Family Diabetes/Gallbladder Study. <i>Diabetes</i> 54, 2655–2662 (2005); Coletta, D. K. et al. Genome-wide linkage scan for genes influencing plasma triglyceride levels in the Veterans Administration Genetic Epidemiology Study. <i>Diabetes</i> 58, 279–284 (2009); Knowler, W. C. et al. The Family Investigation of Nephropathy and Diabetes (FIND): design and methods. <i>J. Diabetes Complicat.</i> 19, 1–9 (2005)                                                                                                                                                                                                                                                    | - Unrelated and non-overlapping individuals/samples drawn from four separate family studies, San Antonio, TX<br>- Cases met one or more of four criteria:<br>1. American Diabetes Association [ADA] criterion (2002) – fasting plasma glucose $\geq 126$ mg/dl<br>2. World Health Organization [WHO] criteria (1999) – fasting plasma glucose $\geq 126$ mg/dl or a 2 hour glucose tolerance test $\geq 200$ mg/dl<br>3. Self-reported physician-diagnosed diabetes and self-reported current therapy with either oral antidiabetic agents or insulin<br>4. Had hemoglobin A1c (HbA1c) $\geq 7.0\%$                                                                           | - No self-reported antidiabetic therapy at any visit, including oral agents or insulin prescribed as a result of physician-diagnosed diabetes AND one or more of the following:<br>1. Fasting glucose <126 mg/dl at each visit<br>2. If OGTT performed, 2 hour glucose must be <200 mg/dl<br>3. No history of diabetes and HbA1c <6.0%, or HbA1c 6.0-6.9% and fasting glucose <126 mg/dl<br>Samples prioritized with strict NGT with no family history first, then NGT in two visits, followed by oldest age | - None applied                                                              | Illumina Cardio-Metabo Chip                |
| Hispanic    | Starr County, Texas (HS)                                                                                                                                                                                                                                                | Harris, C. L. et al. Diabetes among Mexican Americans in Starr County, Texas. <i>Am. J. Epidemiol.</i> 118, 659–672 (1983); Below JE, et al. Genome-wide association and meta-analysis in populations from Starr County, Texas and Mexico City identify type 2 diabetes susceptibility loci and enrichment for eQTLs in top signals. <i>Diabetologia</i> 54, 2047–2055 (2011)                                                                                                                                                                                                                                                                                                                                                                                                                                                                                                                                                                                                            | - Diagnosis of diabetes according to National Diabetes Data Group (1979) guidelines drawn from several studies in Starr County;<br>1. Fasting glucose $\geq 140$ mg/dl on more than 1 occasion<br>2. Self-reported physician-diagnosed diabetes and self reported therapy with either oral antidiabetic agents or insulin (either currently or for more than one month in the past)<br>- In instances where cases were drawn from families, the individual with youngest age at onset was chosen                                                                                                                                                                              | - Controls ascertained from epidemiologically represented sample of individuals in Starr County, TX<br>- Individuals with known diagnosis of diabetes excluded<br>- Impaired glucose tolerant and impaired fasting glucose controls retained due to the age difference between cases and controls (controls are younger on average) and to allow sufficient sample size                                                                                                                                      | - Cases with age of onset <35 and BMI <30 excluded as potential T1D or MODY | Affymetrix Genome-Wide Human SNP Array 6.0 |
| South Asian | London Life Sciences Population Study [UK Indian Asians] (SL)                                                                                                                                                                                                           | Chambers, J.C. et al. Genome-wide association study identifies variants in TM6RS6 associated with hemoglobin levels. <i>Nat. Genet.</i> 41, 1170–1172 (2009); Chambers, J.C. et al. Common genetic variation near melatonin receptor MTNR1B contributes to raised plasma glucose and increased risk of type 2 diabetes among Indian Asians and European Caucasians. <i>Diabetes</i> 58, 2703–2708 (2009); van der Harst, P. et al. Seventy-five genetic loci influencing the human red blood cell. <i>Nature</i> 492, 369–375 (2012)                                                                                                                                                                                                                                                                                                                                                                                                                                                     | - Samples chosen from a population-based cohort study<br>- Indian Asians living in West London, UK with all 4 grandparents born on the Indian subcontinent<br>- Prevalent T2D defined as previous physician diagnosis of diabetes on treatment, with onset of diabetes after the age of 18 years and without insulin use in the first year after diagnosis; or fasting plasma glucose $\geq 7.0$ mmol/L                                                                                                                                                                                                                                                                       | - No previous history of diabetes<br>- No anti-diabetic medication<br>- Fasting plasma glucose <6.0 mmol/L                                                                                                                                                                                                                                                                                                                                                                                                   | - Samples with age of onset <18 excluded                                    | Illumina Human610-Quad BeadChip            |
| South Asian | Singapore Indian Eye Study [Singapore Indians] (SS)                                                                                                                                                                                                                     | Sim, X. et al. Transferability of type 2 diabetes implicated loci in multi-ethnic cohorts from Southeast Asia. <i>PLoS Genet.</i> 7(4), e1001363 (2011)                                                                                                                                                                                                                                                                                                                                                                                                                                                                                                                                                                                                                                                                                                                                                                                                                                  | - HbA1c $\geq 6.5\%$ or personal history of diabetes with age at diagnosis available<br>- Preferentially selected cases with at least one first degree relative with T2D                                                                                                                                                                                                                                                                                                                                                                                                                                                                                                      | - HbA1c <6%<br>- No personal history of diabetes<br>- Not taking antidiabetes medication<br>- Older controls preferentially selected                                                                                                                                                                                                                                                                                                                                                                         | - None applied                                                              | Illumina Human610-Quad BeadChip            |

**Supplementary Table 4b | Exome sequence sample characteristics**

| Ancestry         | Study                                                                                                                                                                                                                                                                   | Cases   |        |               |                                  |                                  |                                   | Controls  |               |                                  |                                  |
|------------------|-------------------------------------------------------------------------------------------------------------------------------------------------------------------------------------------------------------------------------------------------------------------------|---------|--------|---------------|----------------------------------|----------------------------------|-----------------------------------|-----------|---------------|----------------------------------|----------------------------------|
|                  |                                                                                                                                                                                                                                                                         | N Total | N Case | # Females (%) | Mean age (SD), years             | Mean BMI (SD), kg/m <sup>2</sup> | Mean age of diagnosis (SD), years | N Control | # Females (%) | Mean age (SD), years             | Mean BMI (SD), kg/m <sup>2</sup> |
| African American | Jackson Heart Study (AJ)                                                                                                                                                                                                                                                | 1026    | 500    | 333 (66.6)    | F: 58.1 (10.0)<br>M: 57.9 (11.2) | F: 34.5 (6.8)<br>M: 31 (4.7)     | F: 49.1 (11.2)<br>M: 49.3 (11.0)  | 526       | 333 (63.3)    | F: 55.8 (11.4)<br>M: 56.4 (11.2) | F: 33 (6.8)<br>M: 30 (5.1)       |
| African American | Wake Forest School of Medicine Study (AW)                                                                                                                                                                                                                               | 1048    | 518    | 308 (59.5)    | F: 64.8 (9.3)<br>M: 62.3 (8.7)   | F: 30.3 (7.1)<br>M: 27.9 (5.3)   | F: 46.9 (10.0)<br>M: 47.6 (9.6)   | 530       | 297 (56.0)    | F: 60.7 (12.2)<br>M: 51.4 (10.8) | F: 31.5 (7.3)<br>M: 28 (6.0)     |
| East Asian       | Korea Association Research Project [Korean] (EK)                                                                                                                                                                                                                        | 1087    | 526    | 240 (45.6)    | F: 55.4 (7.2)<br>M: 52.5 (7.4)   | F: 26.3 (3.4)<br>M: 25.2 (3.0)   | F: NA<br>M: NA                    | 561       | 328 (58.5)    | F: 62.9 (3.5)<br>M: 63.8 (3.6)   | F: 24.2 (3.1)<br>M: 23.1 (2.8)   |
| East Asian       | Singapore Diabetes Cohort Study and Singapore Prospective Study Program [Singapore Chinese] (ES)                                                                                                                                                                        | 1078    | 486    | 253 (52.1)    | F: 58.7 (9.9)<br>M: 57.3 (8.7)   | F: 25.6 (3.9)<br>M: 25.6 (3.7)   | F: 45.5 (9.0)<br>M: 44.2 (9.4)    | 592       | 363 (61.3)    | F: 58.1 (6.7)<br>M: 58.5 (7.5)   | F: 22.8 (3.4)<br>M: 23 (3.3)     |
| European         | Ashkenazi (UA)                                                                                                                                                                                                                                                          | 861     | 506    | 238 (47)      | F: 65.9 (8.7)<br>M: 65.6 (8.6)   | F: 27.6 (3.2)<br>M: 27.2 (3.1)   | F: 49 (5.5)<br>M: 47.7 (5.3)      | 355       | 202 (56.9)    | F: 80.1 (14.5)<br>M: 76.7 (11.5) | F: 24.4 (4.3)<br>M: 26.3 (3.7)   |
| European         | Metabolic Syndrome in Men Study [Finnish] (UM)                                                                                                                                                                                                                          | 982     | 484    | 0 (0)         | F: NA<br>M: 60.4 (6.7)           | F: NA<br>M: 30.6 (5.1)           | F: NA<br>M: 54.6 (8.5)            | 498       | 0 (0)         | F: NA<br>M: 54.7 (4.5)           | F: NA<br>M: 25.8 (3.1)           |
| European         | Finland-United States Investigation of NIDDM Genetics (FUSION) Study [Finnish]                                                                                                                                                                                          | 948     | 472    | 201 (42.6)    | F: 58.6 (9.0)<br>M: 56.9 (7.1)   | F: 31.3 (5.6)<br>M: 30.5 (5.5)   | F: NA<br>M: NA                    | 476       | 214 (45.0)    | F: 63.8 (7.1)<br>M: 62.2 (7.3)   | F: 28.5 (4.4)<br>M: 27.5 (3.3)   |
| European         | KORA [German]                                                                                                                                                                                                                                                           | 187     | 97     | 43 (44.3)     | F: 60.6 (8.8)<br>M: 61.9 (7.6)   | F: 28.9 (2.8)<br>M: 27.9 (2.8)   | F: NA<br>M: NA                    | 90        | 57 (63.3)     | F: 68.9 (5.4)<br>M: 70.9 (5.8)   | F: 34.6 (3.5)<br>M: 34.2 (3.4)   |
| European         | UKT2D Consortium                                                                                                                                                                                                                                                        | 642     | 322    | 147 (45.7)    | F: 51.2 (9.1)<br>M: 48.9 (7.7)   | F: 27.1 (2.7)<br>M: 26.4 (2.7)   | F: NA<br>M: NA                    | 320       | 265 (82.8)    | F: 60.9 (10.2)<br>M: 59.8 (9.0)  | F: 31 (6.2)<br>M: 28.4 (3.7)     |
| European         | Malmö-Botnia Study [Finnish, Swedish]                                                                                                                                                                                                                                   | 921     | 478    | 262 (54.8)    | F: 56.8 (10.1)<br>M: 52.5 (10.2) | F: 24.8 (2.8)<br>M: 23.9 (2.2)   | F: 47.4 (7.7)<br>M: 45.6 (7.2)    | 443       | 194 (43.8)    | F: 68 (8.0)<br>M: 65.6 (8.1)     | F: 33.7 (4.1)<br>M: 32.2 (3.9)   |
| Hispanic         | San Antonio Mexican American Family Studies: San Antonio Family Heart Study, San Antonio Family Diabetes/Gallbladder Study, Veterans Administration Genetic Epidemiology Study, and Family Investigation of Nephropathy and Diabetes Study - San Antonio Component (HA) | 490     | 272    | 160 (58.8)    | F: 58 (13.3)<br>M: 57.7 (11.0)   | F: 32.9 (6.9)<br>M: 31.6 (7.7)   | F: 45.5 (14.7)<br>M: 44.5 (14.4)  | 218       | 128 (58.7)    | F: 53.3 (15.2)<br>M: 50.9 (14.6) | F: 31.1 (7.3)<br>M: 28.9 (6.1)   |
| Hispanic         | Starr County, Texas (HS)                                                                                                                                                                                                                                                | 1453    | 749    | 447 (59.7)    | F: 56 (11.9)<br>M: 56.9 (11.8)   | F: 32.9 (6.8)<br>M: 30.2 (5.3)   | F: 46 (11.0)<br>M: 47.7 (11.0)    | 704       | 506 (71.9)    | F: 39.1 (9.4)<br>M: 39.4 (11.1)  | F: 30.4 (6.5)<br>M: 29.5 (5.3)   |
| South Asian      | London Life Sciences Population Study [UK Indian Asians] (SL)                                                                                                                                                                                                           | 1069    | 531    | 75 (14.1)     | F: 53.4 (5.5)<br>M: 52.7 (5.7)   | F: 27.7 (3.0)<br>M: 26.5 (2.8)   | F: NA<br>M: NA                    | 538       | 85 (15.8)     | F: 63.6 (8.9)<br>M: 63.4 (9.2)   | F: 28.2 (4.4)<br>M: 27 (3.3)     |
| South Asian      | Singapore Indian Eye Study [Singapore Indians] (SS)                                                                                                                                                                                                                     | 1148    | 563    | 250 (44.4)    | F: 59.8 (9.4)<br>M: 61.6 (9.9)   | F: 28.2 (6.0)<br>M: 25.9 (4.0)   | F: 50.5 (10.7)<br>M: 50.9 (10.5)  | 585       | 288 (49.2)    | F: 55.8 (9.7)<br>M: 56.4 (10.4)  | F: 26.3 (5.6)<br>M: 24.4 (3.5)   |



**Supplementary Figure 5 | Quality control of 12,940 WES samples.** To assess the sequencing quality of each sample, we computed multiple statistics stratified by sample ethnicity. We then identified outlier samples relative to any of the statistical distributions and excluded them from further analysis. Shown are the distributions for nine representative statistics after samples were removed from analysis; note that these metrics are computed prior to any variant quality control and thus measure different statistics than presented in other display items. Number of variants: the number of variants (biallelic or multiallelic SNPs and INDELs) at which the sample exome carries a minor allele. Number of biallelic SNPs: the number of biallelic SNPs at which the sample exome carries a minor allele. Number of biallelic indels: the number of biallelic INDELs at which the sample exome carries a minor allele. Number of singletons: the number of variants carried by the sample alone (e.g., at which all other samples have the reference genotype). Heterozygosity: the heterozygosity of the sample computed across all variant sites. Heterozygosity at low frequency variants: the heterozygosity of the sample computed across low-frequency (MAF < 1%) variant sites. Heterozygous:Homozygous ratio: the ratio of heterozygous non-reference alleles to homozygous non-reference alleles in the sample. Mean allele balance: the fraction of sequence reads containing the non-reference allele, averaged over all heterozygous sites in the sample. Mean allele balance at singleton sites: the fraction of sequence reads containing the non-reference allele, averaged over all singleton heterozygous sites in the sample.

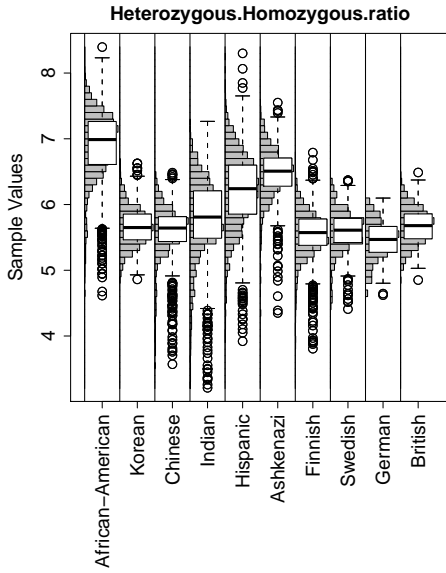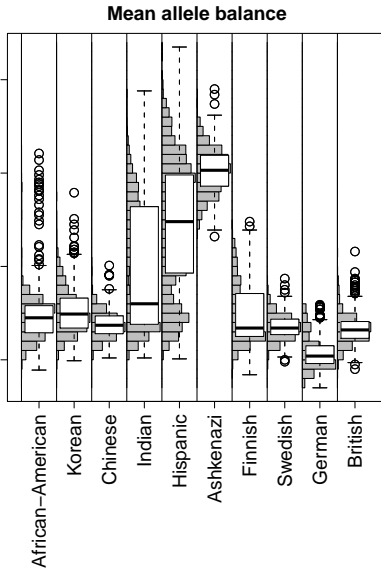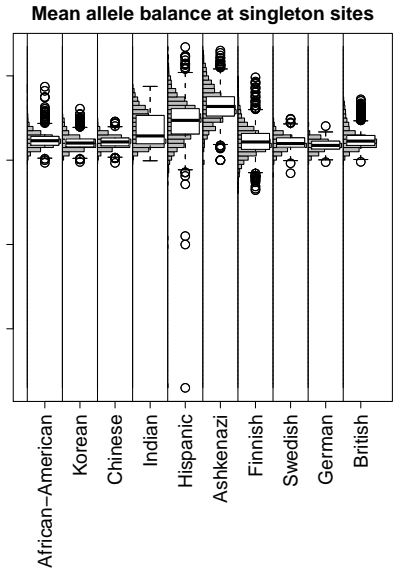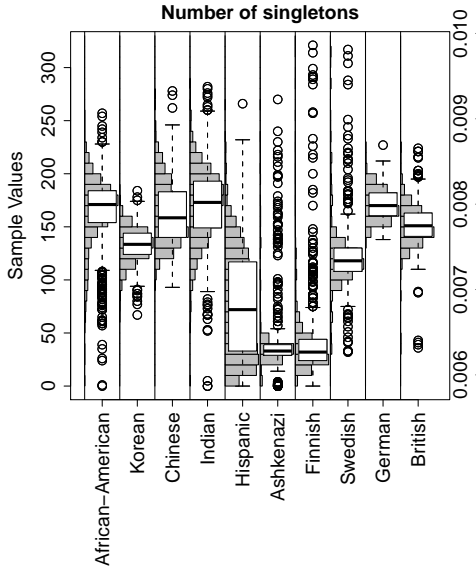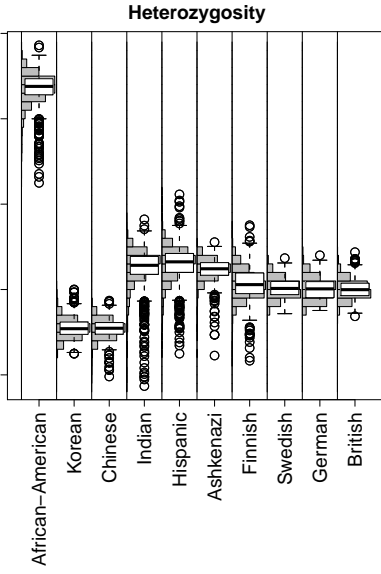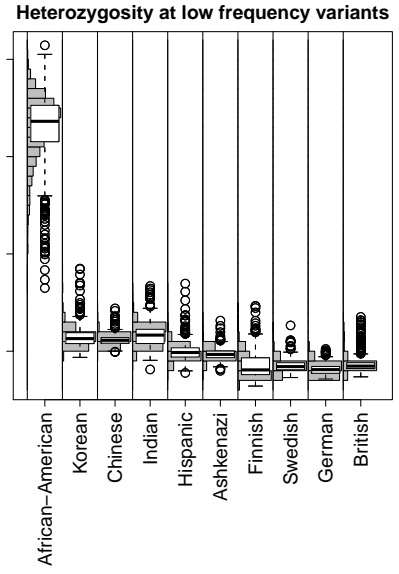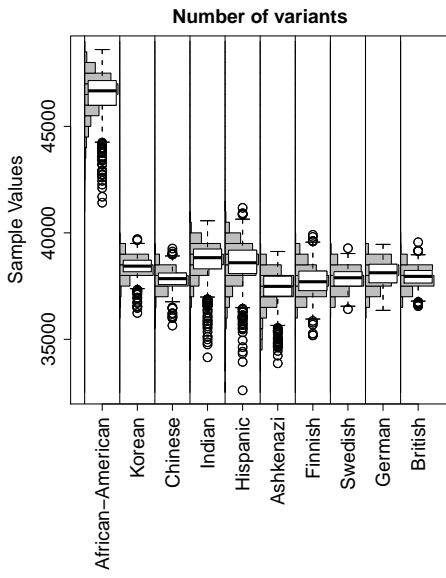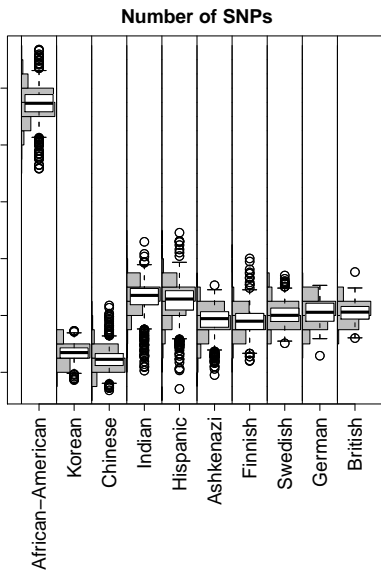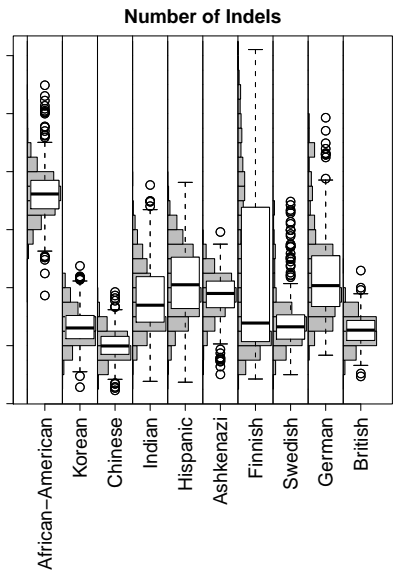

**Supplementary Figure 6 | Quality control of INDELS.** To assess the quality of called INDEL variants, we computed two metrics. (a) The number of INDELS with size equal to  $x \pmod{3}$ , for various values of  $x$ . Negative values represent deletions, while positive values represent insertions. As frameshift variants are more likely to disrupt protein sequence than in-frame deletions, spikes at increments of three are expected for INDEL variants in the population. (bc) Principal component analysis of the 12,940 European samples, computed using common (MAF > 1%) (b) SNPs and INDELS and (c) INDELS only. If the majority of common SNPs and INDELS are of high quality, the principal components should be concordant between the two analyses.

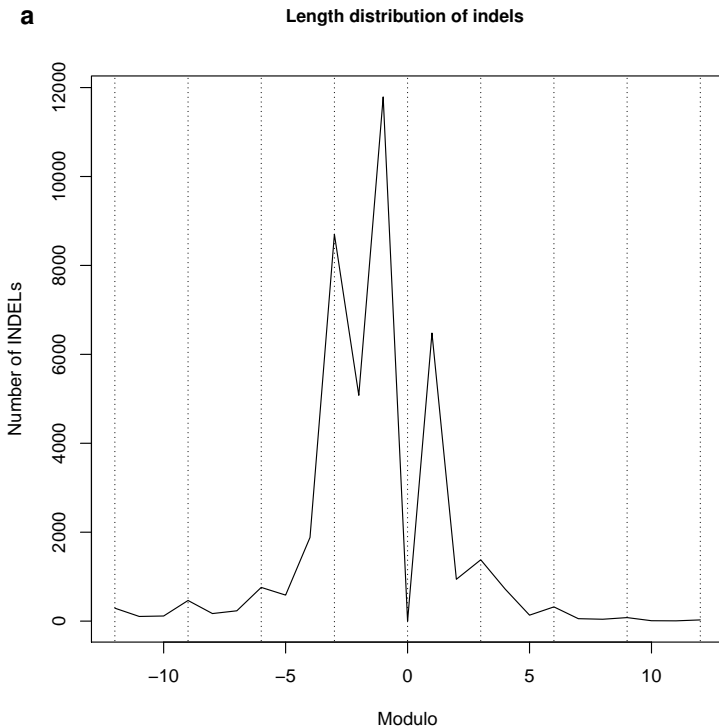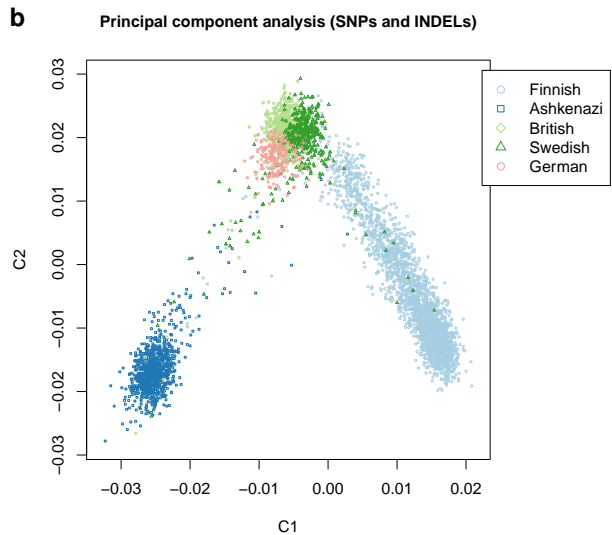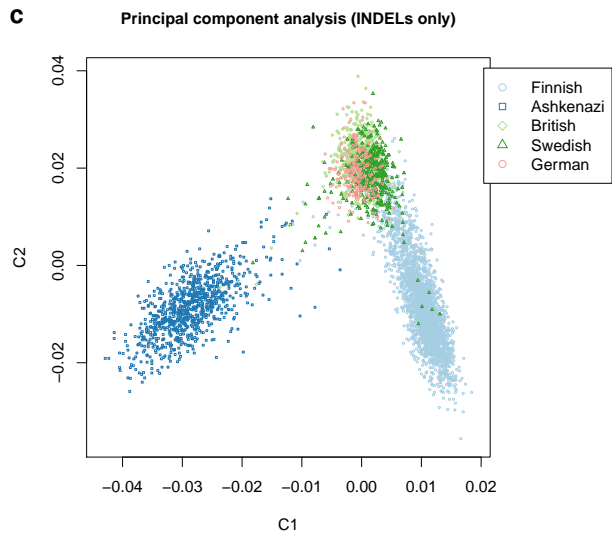

Supplementary Table 7 | Per individual variant counts by ethnic group

**QC+ variants**

|                                | All samples                | African-American           | East-Asian                 | European                   | Hispanic                   | South-Asian                |
|--------------------------------|----------------------------|----------------------------|----------------------------|----------------------------|----------------------------|----------------------------|
| <b>Samples:</b>                | 12,940                     | 2,074                      | 2,165                      | 4,541                      | 1,943                      | 2,217                      |
| <b>Variants:</b>               |                            |                            |                            |                            |                            |                            |
| Synonymous SNP                 | 9243 [8423;11487]          | 10910 [9857;11487]         | 8837 [8559;9258]           | 8851 [8427;9264]           | 9024 [8595;9428]           | 9070 [8423;9387]           |
| Missense SNP                   | 7636 [6935;9271]           | 8885 [8038;9271]           | 7348 [7042;8133]           | 7341 [6939;7933]           | 7468 [7069;8155]           | 7499 [6935;7885]           |
| Start SNP*                     | 11 [4;22]                  | 12 [5;22]                  | 9 [4;16]                   | 11 [4;18]                  | 11 [5;18]                  | 11 [5;20]                  |
| Nonsense SNP*                  | 62 [37;93]                 | 69 [50;93]                 | 60 [40;82]                 | 60 [37;84]                 | 61 [45;93]                 | 60 [44;81]                 |
| Frameshift INDEL*              | 137 [115;182]              | 147 [124;172]              | 137 [120;160]              | 134 [115;155]              | 136 [118;182]              | 136 [117;156]              |
| Inframe INDEL                  | 76 [56;111]                | 89 [70;111]                | 72 [60;90]                 | 72 [56;91]                 | 75 [58;92]                 | 75 [59;91]                 |
| 3'UTR SNP, INDEL               | 532 [449;700]              | 633 [548;700]              | 513 [465;589]              | 506 [449;567]              | 516 [461;578]              | 523 [474;576]              |
| 5'UTR SNP, INDEL               | 864 [747;1119]             | 1021 [903;1119]            | 836 [783;895]              | 824 [747;904]              | 843 [781;942]              | 848 [769;924]              |
| Intron SNP, INDEL              | 13110 [11477;16462]        | 15590 [13917;16462]        | 12540 [12119;13972]        | 12510 [11989;13611]        | 12810 [12159;14405]        | 12830 [11477;13357]        |
| Essential splicing SNP, INDEL* | 40 [27;61]                 | 46 [30;61]                 | 42 [30;55]                 | 38 [27;55]                 | 40 [27;56]                 | 39 [28;56]                 |
| Other splicing SNP, INDEL      | 1586 [1411;2022]           | 1886 [1675;2022]           | 1531 [1455;1652]           | 1514 [1411;1614]           | 1543 [1426;1641]           | 1547 [1417;1644]           |
| Non-coding RNA SNP, INDEL      | 245 [192;337]              | 288 [241;337]              | 232 [192;266]              | 236 [196;290]              | 238 [199;277]              | 239 [193;283]              |
| <b>All variants</b>            | <b>34070 [30901;41971]</b> | <b>40330 [36180;41971]</b> | <b>32640 [31659;35250]</b> | <b>32570 [31079;35021]</b> | <b>33280 [31666;36390]</b> | <b>33390 [30901;34590]</b> |
| <b>All Biallelic SNPs</b>      | <b>31770 [28811;38933]</b> | <b>37490 [33674;38933]</b> | <b>30460 [29534;32871]</b> | <b>30400 [29014;32652]</b> | <b>31040 [29585;33864]</b> | <b>31150 [28811;32262]</b> |
| <b>All Biallelic INDELS</b>    | <b>265 [171;597]</b>       | <b>452 [299;597]</b>       | <b>230 [187;305]</b>       | <b>217 [171;299]</b>       | <b>247 [199;366]</b>       | <b>239 [191;309]</b>       |
| <b>All Multiallelics</b>       | <b>2036 [1821;2565]</b>    | <b>2383 [2140;2565]</b>    | <b>1948 [1844;2255]</b>    | <b>1958 [1837;2265]</b>    | <b>1991 [1849;2281]</b>    | <b>1999 [1821;2169]</b>    |

\* Protein truncating

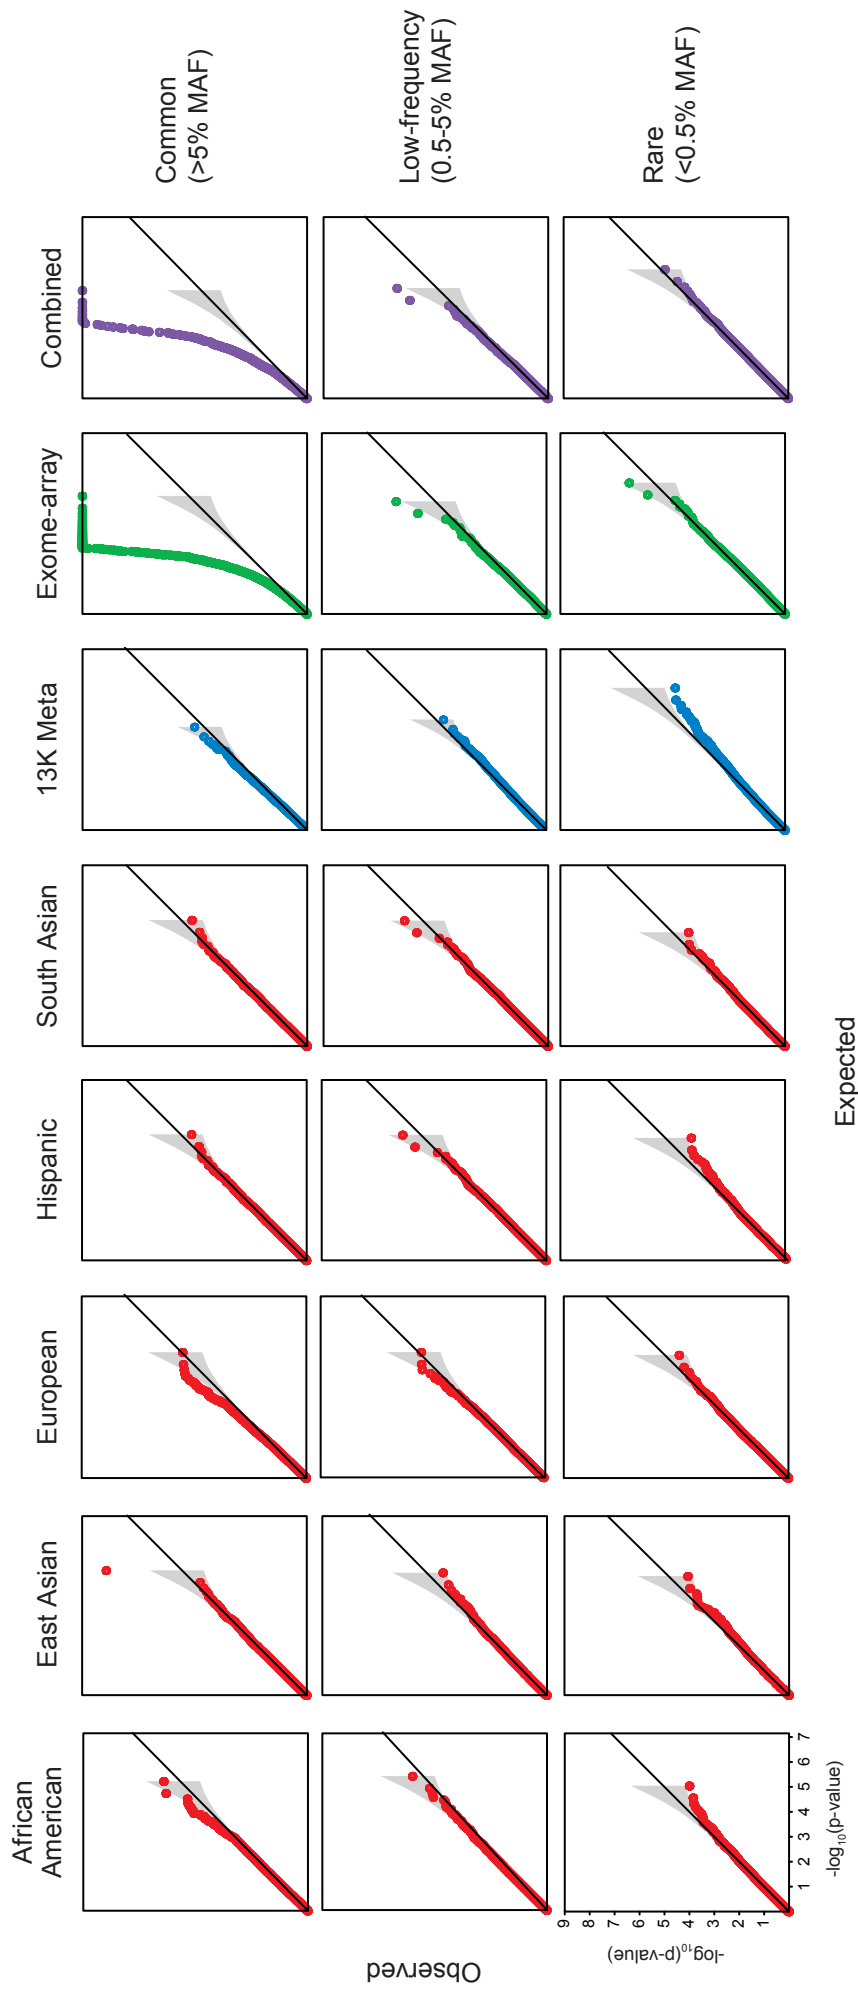

**Supplementary Figure 8 | Single variant analyses for exome sequence and combined data sets.** QQ plots for each of the three minor allele frequency categories (common, low-frequency, and rare) for (a) each of the five major ancestry groups included in the exome sequencing study (African American N=2,074; East Asian N=2,165; European N=4,541; Hispanic N=1,943; South Asian N=2,217); (b) the combined exome sequencing results ("13K Meta", N=12,940); (c) all exome array data ("Exome-array", N=79,854); and (d) exome array data combined with exome sequence data ("Combined", N=92,794). The grey region on each plot represents the (analytically estimated) 95% confidence interval.

**Supplementary Table 9A | Distribution of mean age-of-diagnosis by *PAX4* Arg192His (rs2233580) genotypes in replication studies.**

| Study           | No. of cases | Age of diagnosis (years)<br>[Mean $\pm$ SD] |                   |                   | $\hat{\beta}$ (SE) | <i>p</i> -value <sup>a</sup> |
|-----------------|--------------|---------------------------------------------|-------------------|-------------------|--------------------|------------------------------|
|                 |              | CC                                          | CT                | TT                |                    |                              |
| SNUH            | 570          | 50.81 $\pm$ 9.67                            | 51.61 $\pm$ 11.52 | 51.20 $\pm$ 10.90 | 0.66               | 0.458                        |
| Hong-Kong       | 489          | 36.41 $\pm$ 9.49                            | 36.80 $\pm$ 10.13 | 32.14 $\pm$ 6.58  | 0.70               | 0.351                        |
| Singapore       | 560          | 57.12 $\pm$ 12.55                           | 56.47 $\pm$ 13.03 | 52.40 $\pm$ 12.18 | -1.26              | 0.232                        |
| <b>Combined</b> | 1,619        |                                             |                   |                   | 0.24               | 0.640                        |

$\hat{\beta}$ : Regression coefficient estimates. SE: standard error

<sup>a</sup> Linear regression *p*-value of age-of- diagnosis with Arg192His

**Supplementary Table 9B | Single-variant T2D association analysis of *PAX4* Arg192His (rs2233580) in each ancestry group from exome-sequence analysis and replication.**

| Ancestral group          | Genotype counts<br>(CC/TC/TT) |                | Odds ratio<br>(95% CI) | <i>p</i> -value       |
|--------------------------|-------------------------------|----------------|------------------------|-----------------------|
|                          | Cases                         | Controls       |                        |                       |
| Within ancestry analysis |                               |                |                        |                       |
| African American         | 1018 / 0 / 0                  | 1056 / 0 / 0   | -                      | -                     |
| East Asian               | 779 / 201 / 32                | 981 / 167 / 5  | 1.79 [1.47-2.19]       | 9.26x10 <sup>-9</sup> |
| European                 | 2359 / 0 / 0                  | 2182 / 0 / 0   | -                      | -                     |
| Hispanic                 | 1021 / 0 / 0                  | 921 / 1 / 0    | -                      | -                     |
| South Asian              | 1093 / 1 / 0                  | 1122 / 1 / 0   | -                      | -                     |
| <b>Meta-analysis</b>     | -                             | -              | 1.79 [1.47-2.19]       | 9.26x10 <sup>-9</sup> |
| Replication studies      |                               |                |                        |                       |
| SNUH                     | 500 / 107 / 15                | 390 / 43 / 8   | 1.62 (1.20 – 2.19)     | 0.00186               |
| Hong-Kong                | 315 / 153 / 22                | 260 / 80 / 3   | 1.76 (1.33 – 2.32)     | 6.81x10 <sup>-5</sup> |
| Singapore                | 504 / 157 / 16                | 568 / 147 / 10 | 1.24 (0.99 – 1.54)     | 0.0588                |
| <b>Meta-analysis</b>     | -                             | -              | 1.47 (1.26 – 1.70)     | 5.87x10 <sup>-7</sup> |

**Supplementary Table 9C | Study information**

| Ancestry   | Study                                                                                                                                                                              | Citation(s)                                                                                                                                                                             | PubMed ID(s) | T2D Case Ascertainment                                                                                                                                   | T2D Control Ascertainment                                                                                                                                                         | T1D and MODY exclusion criteria                                                                                                                        | Genotyping and QC                                                                                                            |
|------------|------------------------------------------------------------------------------------------------------------------------------------------------------------------------------------|-----------------------------------------------------------------------------------------------------------------------------------------------------------------------------------------|--------------|----------------------------------------------------------------------------------------------------------------------------------------------------------|-----------------------------------------------------------------------------------------------------------------------------------------------------------------------------------|--------------------------------------------------------------------------------------------------------------------------------------------------------|------------------------------------------------------------------------------------------------------------------------------|
| East Asian | <i>Hong Kong Diabetes Registry + Using resequencing and bioinformatics to discover a genomic signatory to predict young onset and familial type 2 diabetes [Hong Kong Chinese]</i> | <i>Ma RC, et al. Genome-wide association study in a Chinese population identifies a susceptibility locus for type 2 diabetes at 7q32 near PAX4. Diabetologia 2013; 56(6): 1291-305.</i> | 23532257     | - Clinically diagnosed with T2D<br>- Cases with early onset diabetes were preferentially selected                                                        | - Fasting blood glucose < 6.1 mmol/l<br>- No history of diabetes<br>- BMI ≤ 25<br>- No central obesity                                                                            | - Cases with T1D presentation were excluded<br>- Cases need insulin within 1 year of diagnosis were excluded                                           | Sanger Sequencing<br>Call Rate = 0.99<br>HWE P = 0.806                                                                       |
| East Asian | Seoul National University Hospital Diabetes Case Control Study [Korean]                                                                                                            | <i>Cho, Y. S. et al. Meta-analysis of genome-wide association studies identifies eight new loci for type 2 diabetes in east Asians. Nat Genet. 11;44(1):67-72 (2011)</i>                | 22158537     | - Clinically diagnosed as T2D using World Health Organization criteria<br>- Participants with at least one sibling with T2D were preferentially included | - Age ≥ 60 years old<br>- No previous history of diabetes<br>- No family history of diabetes in first degree relatives<br>- Fasting plasma glucose < 6.1 mmol/l<br>- HbA1c < 5.8% | - Diabetes patients positive for GAD antibodies were excluded<br>- Diabetes patients with onset before age of 25 or suspected MODY cases were excluded | TaqMan genotyping<br>Call rate = 0.997<br>HWE P = 2.0e-4 (re-sequencing confirms genotype calls of minor allele homozygotes) |
| East Asian | <i>Singapore Diabetes Cohort Study and Singapore Prospective Study Program [Singapore Chinese]</i>                                                                                 | <i>Sim, X. et al. Transferability of type 2 diabetes implicated loci in multi-ethnic cohorts from Southeast Asia. PLoS Genet. 7(4), e1001363 (2011)</i>                                 | 21490949     | - Clinically ascertained T2D from primary care clinics                                                                                                   | - Fasting blood glucose < 6 mmol/l<br>- No personal history of diabetes<br>- No anti-diabetic medication                                                                          | - Clinical records were extracted from primary care clinics, and suspected T1D and MODY cases were excluded                                            | Illumina Human1M-Duo v3.0<br>Call rate = 1.00<br>HWE P = 0.86                                                                |

**Supplementary Table 9D | Sample characteristics**

| Ancestry   | Study                                                                                                                                                                              | N Total | Cases  |               |                      |                                  |                                   | Controls  |               |                      |                                  |
|------------|------------------------------------------------------------------------------------------------------------------------------------------------------------------------------------|---------|--------|---------------|----------------------|----------------------------------|-----------------------------------|-----------|---------------|----------------------|----------------------------------|
|            |                                                                                                                                                                                    |         | N Case | # Females (%) | Mean age (SD), years | Mean BMI (SD), kg/m <sup>2</sup> | Mean age of diagnosis (SD), years | N Control | # Females (%) | Mean age (SD), years | Mean BMI (SD), kg/m <sup>2</sup> |
| East Asian | <i>Hong Kong Diabetes Registry + Using resequencing and bioinformatics to discover a genomic signatory to predict young onset and familial type 2 diabetes [Hong Kong Chinese]</i> | 833     | 490    | 274 (55.9)    | F: 43.5 (11.4)       | F: 25.0 (4.2)                    | F: 34.7 (8.8)                     | 343       | 183 (52.7)    | F: 43.3 (9.0)        | F: 22.9 (3.9)                    |
|            |                                                                                                                                                                                    |         |        |               | M: 46.6 (12.3)       | M: 24.8 (4.1)                    | M: 38.4 (10.2)                    |           |               | M: 43.9 (10.5)       | M: 23.9 (3.1)                    |
| East Asian | Seoul National University Hospital Diabetes Case Control Study [Korean]                                                                                                            | 1063    | 622    | 344 (55.3)    | F: 60.6 (9.6)        | F: 24.6 (4.4)                    | F: 51.4 (9.5)                     | 441       | 248 (56.2)    | F: 64.4 (3.1)        | F: 24.0 (3.3)                    |
|            |                                                                                                                                                                                    |         |        |               | M: 59.9 (10.0)       | M: 24.1 (3.3)                    | M: 50.4 (10.7)                    |           |               | M: 65.2 (3.8)        | M: 22.5 (3.6)                    |
| East Asian | <i>Singapore Diabetes Cohort Study and Singapore Prospective Study Program [Singapore Chinese]</i>                                                                                 | 1402    | 677    | 232(16.5)     | F: 65.6(10.3)        | F: 25.4(4.2)                     | F: 57.1(12.9)                     | 725       | 281(20.0)     | 42.1(7.1)            | 21.9(3.5)                        |
|            |                                                                                                                                                                                    |         |        |               | M: 66.3(9.9)         | M: 25.2(3.6)                     | M: 56.7(12.6)                     |           |               | 44.2(8.8)            | 23.4(3.2)                        |



**Supplementary Table 10 | Summary of biological knowledge for genes described in the paper**

| Gene           | Biological function                                                                                                                                                                                                                                                                                                                                                                                                                                                         | Previously disease association                                                                                                                                                                                                                     | Mouse knockout model                                                                                                                                                                                                                                                                                                                |
|----------------|-----------------------------------------------------------------------------------------------------------------------------------------------------------------------------------------------------------------------------------------------------------------------------------------------------------------------------------------------------------------------------------------------------------------------------------------------------------------------------|----------------------------------------------------------------------------------------------------------------------------------------------------------------------------------------------------------------------------------------------------|-------------------------------------------------------------------------------------------------------------------------------------------------------------------------------------------------------------------------------------------------------------------------------------------------------------------------------------|
| <i>ABCC8</i>   | "ATP-binding cassette sub-family C member 8". Member of the superfamily of ATP-binding cassette (ABC) transporters, which modulates ATP-sensitive potassium channels and insulin release from beta cells. Receptor for sulfonylurea antidiabetic agents (SUR1).                                                                                                                                                                                                             | T2D (OMIM 125853). Leucine-sensitive hypoglycemia of infancy (OMIM 240800). Familial hyperinsulinemic hypoglycemia 1 (OMIM 256450). Transient neonatal diabetes mellitus type 2 (OMIM 610374). Permanent neonatal diabetes mellitus (OMIM 606176). | Adult mice are glucose intolerant with reduced glucose-stimulated insulin secretion from isolated islets (PMID 10734066).                                                                                                                                                                                                           |
| <i>COBLL1</i>  | "Cordon-bleu protein-like 1". Contains two WH2 (Wiskott-Aldrich homology 2) actin binding domains.                                                                                                                                                                                                                                                                                                                                                                          | T2D (PMID 23160641). Metabolic Syndrome (PMID 24981077). Lower fasting insulin and lower insulin resistance in obese children (PMID 23463496). BMI-adjusted waist-hip-ratio in women (PMID 23754948).                                              | No knockout reported.                                                                                                                                                                                                                                                                                                               |
| <i>FES</i>     | "Tyrosine-protein kinase Fes/Fps". Cytoplasmic protein tyrosine kinase implicated in the regulation of the actin cytoskeleton and myeloid differentiation. Promotes survival of leukemia cells and is present as an activated kinase in some patients with acute myeloid leukemia.                                                                                                                                                                                          | Feline sarcoma (Fes) / Fujinami avian sarcoma (Fps) viral oncogene homolog (OMIM 190030).                                                                                                                                                          | No metabolic phenotypes identified. Knockouts show partial lethality and runting. Adults have abnormal hematopoiesis and leukocyte function (PMID 11021537).                                                                                                                                                                        |
| <i>GCKR</i>    | "Glucokinase (hexokinase 4) regulator". Member of Sugar Isomerase (SIS) family of proteins that forms a complex with and inhibits glucokinase in liver and possibly pancreatic beta cells and neurons.                                                                                                                                                                                                                                                                      | T2D (OMIM 125853). Serum glucose and insulin-related traits (PMID 20081858). Serum triglycerides (PMID 18193043) and LDL cholesterol (PMID 18179892). Plasma C-reactive protein (PMID 18439548).                                                   | Reduced hepatic glucokinase expression and activity. Altered glucose and insulin homeostasis worsened by high-sucrose diet (PMID 10588736).                                                                                                                                                                                         |
| <i>GPSM1</i>   | "G-protein-signaling modulator 1". Receptor-independent activator of basal G-protein signaling. Inhibits GDP-dissociation from Galpha(i). Associated SNP affects a putative interaction site for STK11/LKB1                                                                                                                                                                                                                                                                 | T2D (PMID 23945395).                                                                                                                                                                                                                               | Reduced body weight and white adipose tissue mass. Increased food consumption and increased nocturnal energy expenditure. Altered blood pressure homeostasis (PMID 18450958).                                                                                                                                                       |
| <i>GRB14</i>   | "Growth factor receptor-bound protein 14" Adapter protein containing SH2, ras-associating and pleckstrin homology domains, involved in receptor kinase signaling. Negative regulator of insulin receptor activation of ERK1/2 (PMID 11726852). Promotes PDPK1 recruitment to activated insulin receptor and subsequent PKB/AKT activation (PMID 15210700).                                                                                                                  | T2D (PMID 21874001). Metabolic Syndrome (PMID 24981077)                                                                                                                                                                                            | Decreased body weight. Improved glucose tolerance. Reduced circulating insulin levels. Increased signaling through IRS-1 and PKB in liver and skeletal muscle (PMID 14749734).                                                                                                                                                      |
| <i>HNF1A</i>   | "Hepatocyte nuclear factor 1-alpha". Transcription factor regulating expression of tissue-specific genes in hepatocytes and islet and exocrine cells of the pancreas.                                                                                                                                                                                                                                                                                                       | T2D (OMIM 125853, OMIM 612520). Maturity-onset diabetes of the young type 3 (OMIM 600496).                                                                                                                                                         | Reduced serum insulin and increased serum glucose levels. Decreased linear growth with GH resistance. Hepatic steatosis with abnormal liver function (PMID 9566924, PMID 8598044).                                                                                                                                                  |
| <i>HNF4A</i>   | "Hepatocyte nuclear factor 4-alpha". Nuclear receptor involved in regulation of liver-specific transcripts, including genes involved in gluconeogenesis and fat metabolism (PMID 23485969).                                                                                                                                                                                                                                                                                 | T2D (OMIM 125853). Maturity-onset diabetes of the young type 1 (OMIM 125850).                                                                                                                                                                      | knockout shows premature death (by early adulthood) with abnormal liver morphology and function. Isoform-specific knockouts show impaired glucose tolerance (HNF4alpha1) and dyslipidemia (HNF4alpha7) (PMID 11158324, PMID 16498401).                                                                                              |
| <i>KCNJ11</i>  | "ATP-sensitive inward rectifier potassium channel 11". Potassium inwardly-rectifying channel. Activity regulated by G-proteins. Provides channel pore whose activity is regulated by the sulfonylurea receptor ABCC8/SUR1 in the beta-cell ATP-sensitive potassium channel.                                                                                                                                                                                                 | T2D (OMIM 125853). Familial hyperinsulinemic hypoglycemia type 2 (OMIM 601820). Transient neonatal diabetes mellitus type 3 (OMIM 610582). Permanent neonatal diabetes mellitus (OMIM 606176).                                                     | Metabolic phenotypes include impaired insulin secretion and mild glucose intolerance. Reduced glucagon secretion in response to hypoglycemia. Increased energy expenditure with reduced susceptibility to diet-induced obesity (PMID 11319559, PMID 20074528).                                                                      |
| <i>MTMR3</i>   | "Myotubularin-related protein 3". Myotubularin dual specificity protein phosphatase. Phosphatase can hydrolyze phosphatidylinositol 3-phosphate, phosphatidylinositol 3,5-bisphosphate and other phosphoinositide lipids.                                                                                                                                                                                                                                                   | LDL cholesterol (PMID 24097068). Lung cancer (PMID 21725308). Early-onset inflammatory bowel disease (PMID 19915574); IgA nephropathy (PMID 21725308).                                                                                             | Impaired glucose tolerance (males). Increased serum alkaline phosphatase (both sexes only) (JAX J103485).                                                                                                                                                                                                                           |
| <i>PAM</i>     | "Peptidyl-glycine alpha-amidating monooxygenase". Catalyzes C-terminal alpha-amidation of peptides, which is required for full bioactivity of some neuropeptides and peptide hormones. Variant alters intragranular domain in NHL2 repeat of peptidyl-alpha-hydroxyglycine alpha-amidating lyase region.                                                                                                                                                                    | T2D (PMID 24464100). Insulinogenic index (PMID 23263489).                                                                                                                                                                                          | Knockout mice die in mid-gestation (e14.5-e15.5). Old heterozygotes (age >10 months) have mild glucose intolerance and increased white fat mass (PMID 16225857).                                                                                                                                                                    |
| <i>PAX4</i>    | "Paired box protein Pax-4". Transcriptional repressor containing homeobox domain that binds to a common element in the glucagon, insulin and somatostatin promoters. Critical roles during fetal pancreatic islet development and differentiation of insulin producing beta cells. Variant alters highly conserved amino acid in homeodomain region (Arg192His) and is predicted to be deleterious by some scores. Located in the GCC1 locus identified by T2D GWA Studies. | T2D (OMIM 125853). Maturity-onset diabetes of the young type 9 (OMIM 612225). Ketosis-prone Diabetes Mellitus (PMID 612227).                                                                                                                       | Knockout mice show early postnatal lethality (within 3d of birth). Pancreatic islets lack cells expressing insulin and somatostatin and contain cells expressing ghrelin, glucagon and islet amyloid polypeptide (PMID 18058910).                                                                                                   |
| <i>PPARG</i>   | "Peroxisome proliferator-activated receptor gamma". Nuclear receptor activated by peroxisome proliferators including hypolipidemic drugs and fatty acids. Key transcriptional regulator of adipocyte differentiation. Controls expression of the peroxisomal beta-oxidation pathway of fatty acids.                                                                                                                                                                         | T2D (OMIM 125853). Obesity (OMIM 601665). Carotid intimal medial thickness 1 (OMIM 609338). Familial partial lipodystrophy type 3 (OMIM 604367).                                                                                                   | Adipose-specific PPARG knockout shows diminished levels of leptin and adiponectin. PPARG liver knockout shows lower cholesterol, FFA, TG. (PMID 10549291, PMID 15070754, PMID 10675354).                                                                                                                                            |
| <i>PPIP5K2</i> | "Inositol hexakisphosphate and diphosphoinositol-pentakisphosphate kinase 2". Bifunctional inositol kinase that acts with the IP6K kinases to synthesize diphosphate group-containing inositol pyrophosphates including diphosphoinositol pentakisphosphate. Regulates a variety of cellular processes including vesicle trafficking, exocytosis, insulin signaling and apoptosis.                                                                                          | No disease associations.                                                                                                                                                                                                                           | No knockout reported.                                                                                                                                                                                                                                                                                                               |
| <i>RREB1</i>   | "Ras-responsive element-binding protein 1". Krueppel C2H2-type zinc-finger protein that binds specifically to the RAS-responsive elements of gene promoters. Variant alters a conserved residue (Asp1171Asn) predicted to be deleterious by some algorithms.                                                                                                                                                                                                                | Body fat distribution (PMID 23966867). Serum urate levels (PMID 20884846).                                                                                                                                                                         | No knockout reported.                                                                                                                                                                                                                                                                                                               |
| <i>SLC30A8</i> | "Solute carrier family 30 member 8". Zinc efflux transporter involved in the accumulation of zinc in intracellular vesicles. Colocalizes with insulin in the secretory pathway granules of insulin-secreting cells. Highly expressed in pancreatic islets.                                                                                                                                                                                                                  | T2D (ClinVar=RCV000001055.1).                                                                                                                                                                                                                      | Reduced islet zinc content, abnormal beta-cell morphology on EM. Inconsistent effects on insulin processing and glucose-induced insulin secretion in vitro. Increased hepatic insulin clearance. Intra-peritoneal glucose tolerance tests show impaired glucose tolerance in young mice (4-6 weeks) (PMID 24051378, PMID 24751356). |
| <i>THADA</i>   | "Thyroid adenoma-associated protein". Locus is disrupted by chromosomal rearrangements involving 2p21 in some benign thyroid adenomas (PMID 12955091). Associated with lower beta-cell response to GLP-1 and arginine (PMID 19833888). Ubiquitously expressed transcript.                                                                                                                                                                                                   | T2D (OMIM 125853). Crohn's disease (PMID 21102463). Prostate cancer (PMID 19767753). Multiple Sclerosis (PMID 22190364). Polycystic ovary syndrome (PMID 21151128).                                                                                | No knockout reported.                                                                                                                                                                                                                                                                                                               |
| <i>TM6SF2</i>  | "Transmembrane 6 superfamily member 2". Gene located in the CILP2-TMS6F2 locus identified by T2D GWA Studies. Ubiquitously expressed transcript encodes endoplasmic reticulum protein that regulates fat metabolism in liver (PMID 24927523).                                                                                                                                                                                                                               | T2D (PMID 22885922). Glu167Lys variant associated with increased susceptibility to nonalcoholic fatty liver disease (PMID 24531328), increased total cholesterol and myocardial infarction risk (PMID 24633158).                                   | No knockout reported. Adeno-associated virus-mediated shRNA knockdown increased hepatic triglyceride content and decreased very-low-density lipoprotein secretion (PMID 24531328).                                                                                                                                                  |
| <i>TSPAN8</i>  | "Tetraspanin-8". Member of the transmembrane 4 glycoprotein superfamily, which is known to interact with integrins.                                                                                                                                                                                                                                                                                                                                                         | SNPs (PMID 18372903) and CNV (PMID 20360734) near TSPAN8 associated with T2D.                                                                                                                                                                      | Lower total body weight, lower fat and lean mass (males only). Lower bone mineral density and phosphorus levels (males only) (PMID 20733586).                                                                                                                                                                                       |
| <i>WFS1</i>    | "Wolframin". Endoplasmic reticulum protein involved in cellular Ca++ homeostasis. Functions in pancreatic beta cell and neuronal survival. Mutations can cause Wolfram Syndrome (also known as DIDMOAD - Diabetes Insipidus, Diabetes Mellitus, Optic Atrophy and Deafness).                                                                                                                                                                                                | T2D (PMID 17603484). Wolfram syndrome 1 (OMIM 222300). Autosomal dominant deafness 6 (OMIM 600965)                                                                                                                                                 | Reduced beta cell mass. Activated ER-stress response associated with apoptosis in beta-cells. Increased blood glucose and decreased insulin secretion (PMID 15058606, PMID 16215705, PMID 19041897).                                                                                                                                |

**Supplementary Table 11a | Gene-level mask descriptions.** Protein truncating (PTV) and missense variants were further annotated to identify variants predicted deleterious by at least one ( $NS_{broad}$ ) or each of five ( $NS_{strict}$ ) prediction algorithms (LRT, Mutation Taster, PolyPhen2-HumDiv, PolyPhen2-HumVar, SIFT). PTV, missense,  $NS_{strict}$ , and  $NS_{broad}$  classes of variants were combined to generate four masks for gene-level testing (described in first column). The second column lists variant categories (and variant counts) contributing to each mask; the third column indicates the total numbers of variants in each mask; the fourth column indicates the number of genes containing at least one variant meeting mask criteria; the final column indicates the median number (and range) of variants per gene for each mask.

| Mask name and description                                                                                                                                                                                                      | Variant classes (number of variants)                                           | Number of variants | Number of genes | Median number of variants/gene [range] |
|--------------------------------------------------------------------------------------------------------------------------------------------------------------------------------------------------------------------------------|--------------------------------------------------------------------------------|--------------------|-----------------|----------------------------------------|
| <b>1) Mask 1 - PTV-only</b><br><i>Predicted protein-truncating variants (PTVs)</i>                                                                                                                                             | PTVs (69,956)                                                                  | 69,956             | 14,415          | 3<br>[1-135]                           |
| <b>2) Mask 2 - PTV + missense</b><br><i>PTVs and missense variants with MAF&lt;1%, as high-frequency variants may be less likely to be deleterious</i>                                                                         | PTVs (69,956)<br>missense, MAF<1%<br>(1,065,607)                               | 1,135,563          | 17,806          | 47<br>[1-4284]                         |
| <b>3) Mask 3 - PTV + <math>NS_{strict}</math></b><br><i>PTVs and missense variants predicted deleterious by all five algorithms (<math>NS_{strict}</math>): LRT, Mutation Taster, PolyPhen2-HumDiv, PolyPhen2-HumVar, SIFT</i> | PTVs (69,956)<br>$NS_{strict}$ (131,976)                                       | 201,932            | 16,757          | 8<br>[1-429]                           |
| <b>4) Mask 4 - PTV + <math>NS_{broad}</math></b><br><i>PTVs and <math>NS_{strict}</math> variants, plus missense variants predicted deleterious by at least one algorithm (<math>NS_{broad}</math>) and with MAF&lt;1%</i>     | PTVs (69,956)<br>$NS_{strict}$ (131,976)<br>$NS_{broad}$ , MAF<1%<br>(603,369) | 805,301            | 17,771          | 33<br>[1-2124]                         |

**Supplementary Table 11b | Numbers of variants for each mask in 12,940 WES samples.**

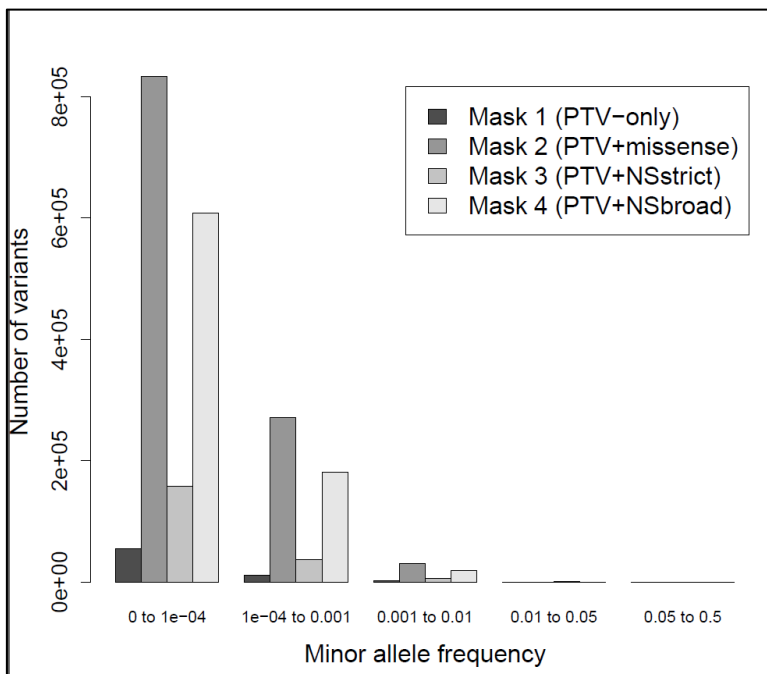

# Supplementary Figure 12 | Manhattan plots for gene-level analysis in 12,940 WES samples

## a. Mask 1 - PTV-only

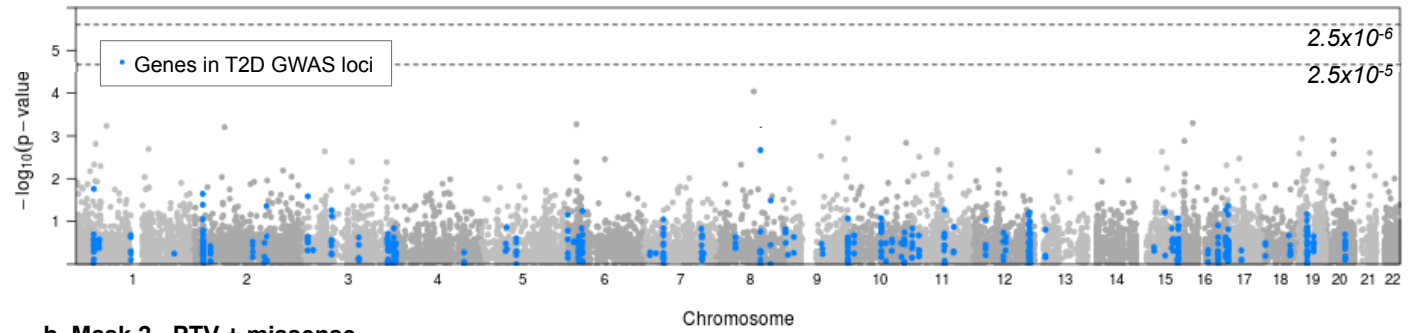

## b. Mask 2 - PTV + missense

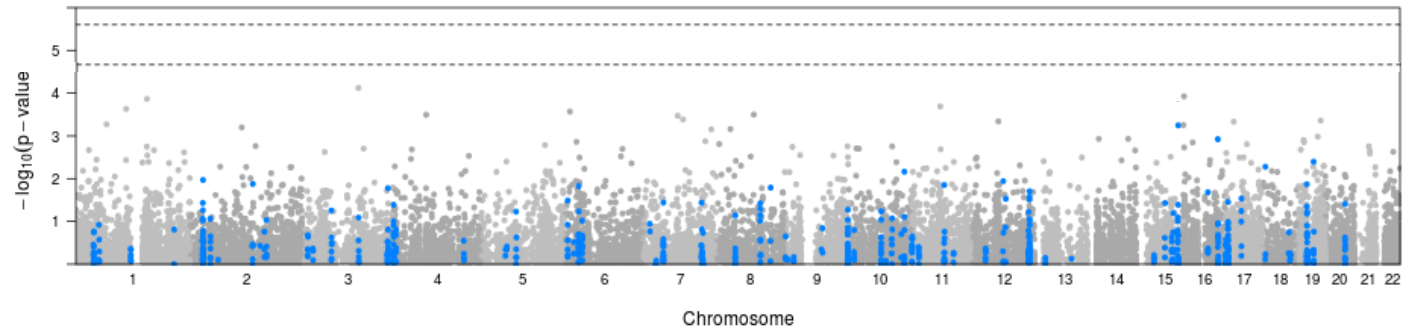

## c. Mask 3 - PTV + $NS_{\text{strict}}$

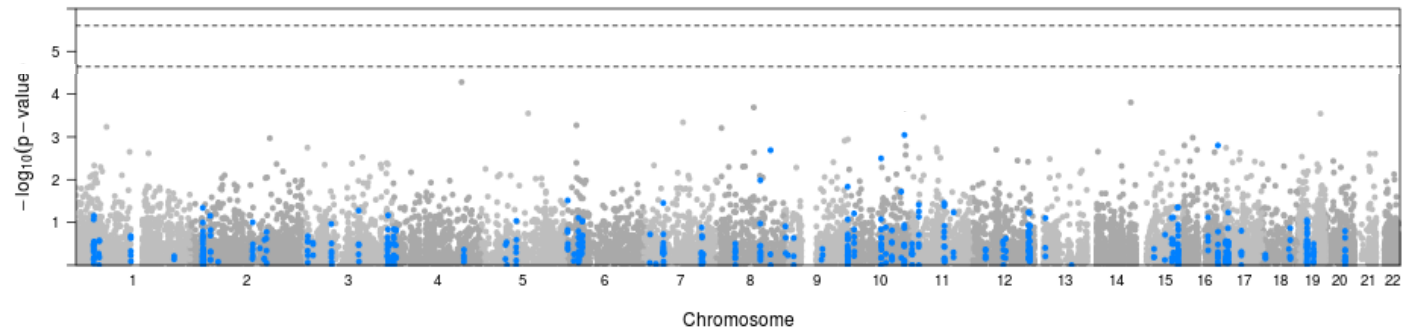

## d. Mask 4 - PTV + $NS_{\text{broad}}$

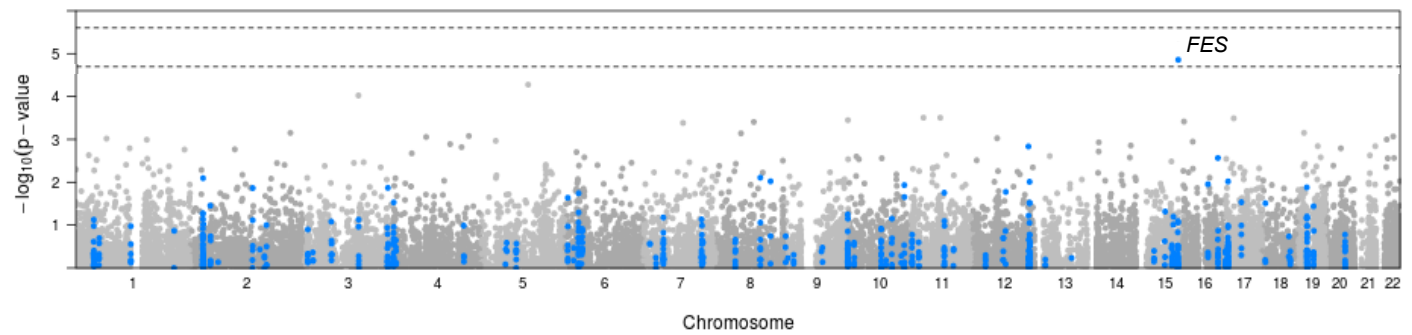

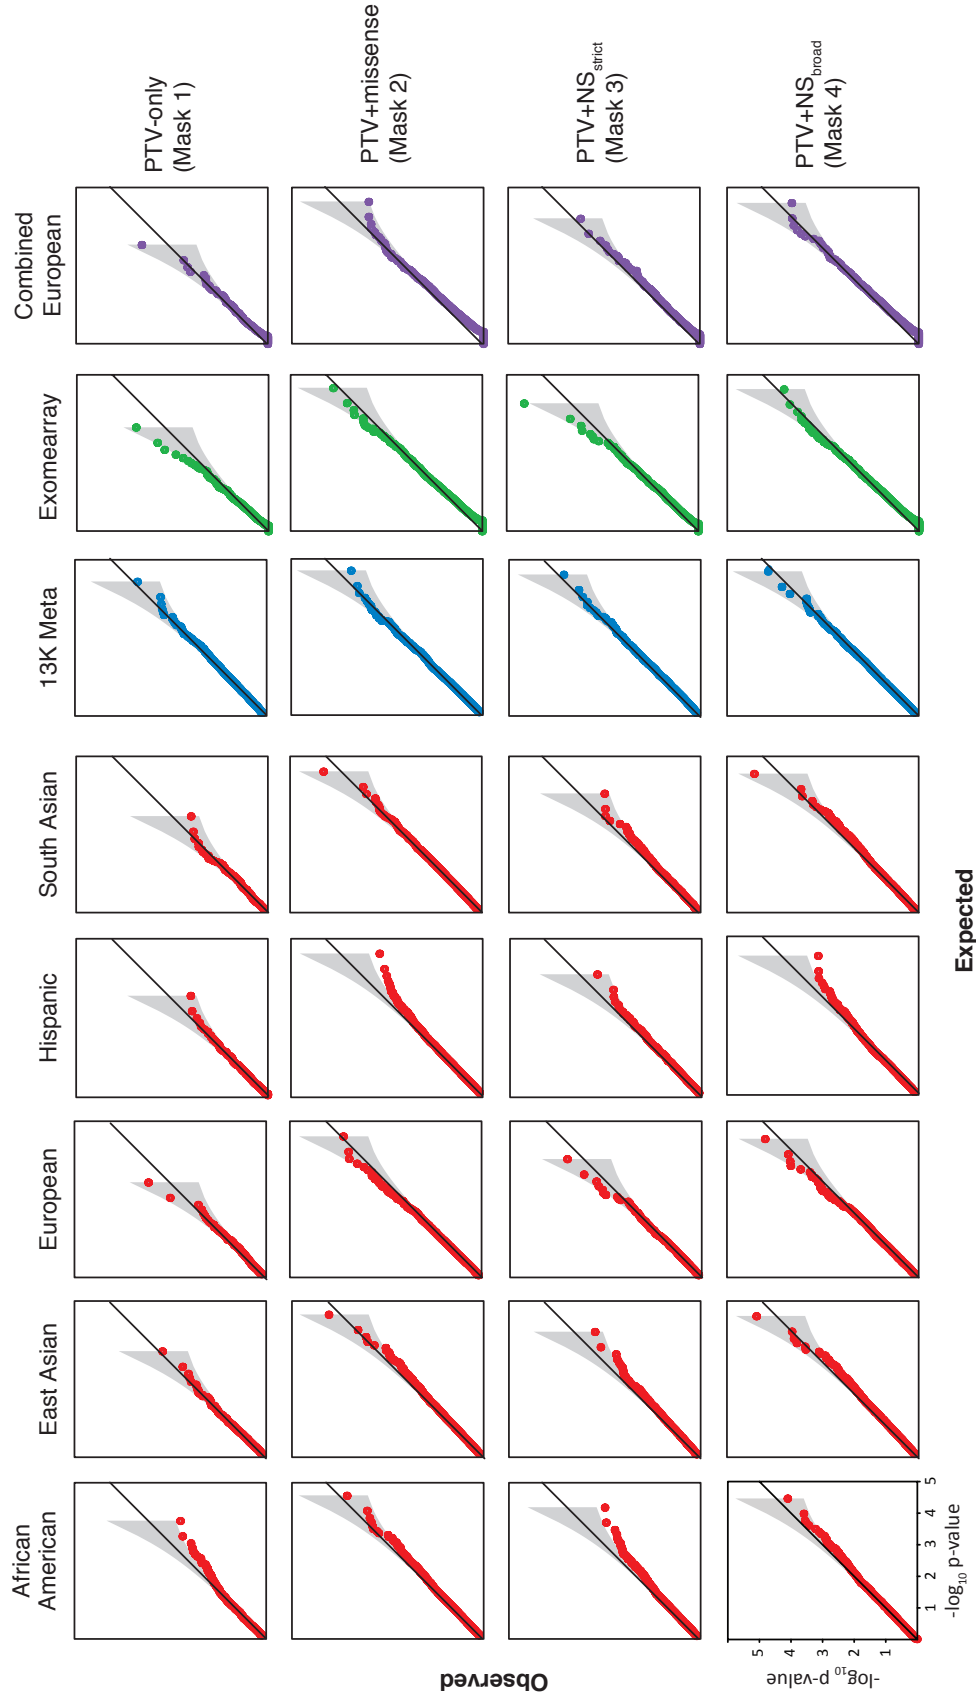

**Supplementary Figure 13 | Aggregate (gene-based) analyses for exome sequence and combined data set** Q-Q plots for each of the four variant masks for (a) each of the five major ancestry groups in the exome sequencing study (African American N=2,074; East Asian N=2,165; European N=4,541; Hispanic N=1,943; South Asian N=2,217); (b) the combined exome sequencing results (“13K Meta”, N=12,940); (c) all exome chip data (“Exome array”, N=79,854); and (d) exome chip data combined with exome sequencing data from Europeans only (“Combined European”, N=84,395). The grey region on each plot represents the (analytically estimated) 95% confidence interval. Across all analyses, there is no compelling evidence that results depart from the null.

**Supplementary Figure 14A | Single variant analyses in GWAS regions.** The QQ plots display single variant analyses for all variants (left) and nonsynonymous variants only (right). Analyses of exome sequence (6,504 cases; 6,436 controls) are in the upper panels, and of the combination of exome sequence and exome array data (34,809 cases, 57,985 controls) in the lower. In each panel, variants mapping to established GWAS regions are in pink, and all other variants in blue (only variants with a minor allele count over 9 are included). The plots show enrichment of association signals for coding variants in established GWAS signals resulting from a combination of linkage disequilibrium to known common variant GWAS signals, and secondary signals at a subset of loci (eg *HNF4A*, *THADA*, *TSPAN8*).

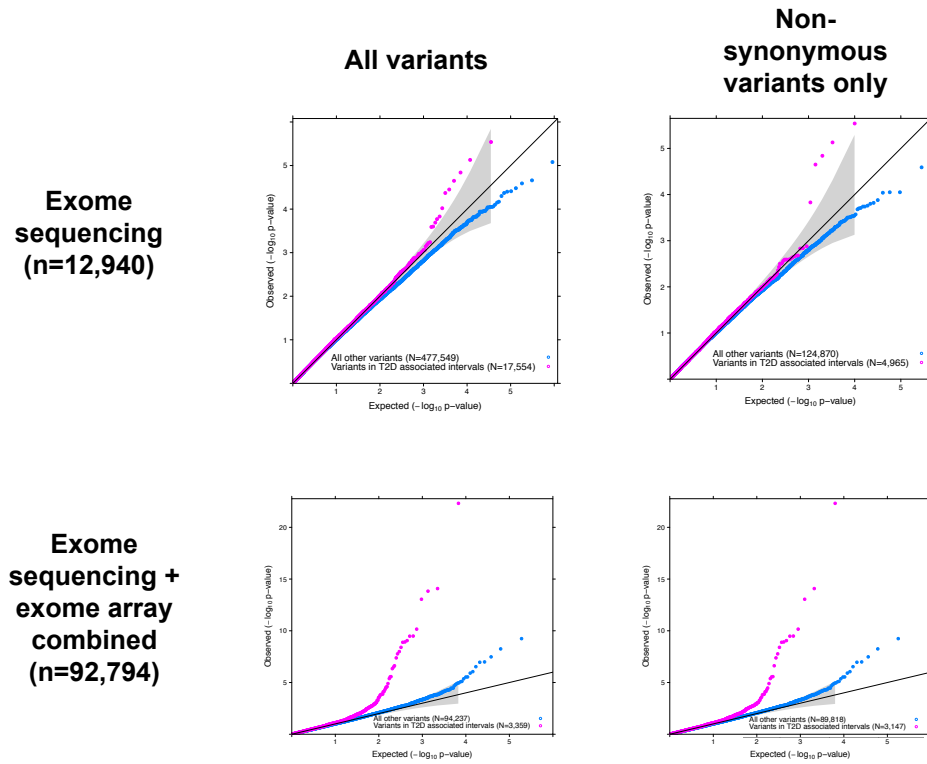

**Supplementary Table 14B | *FES* gene-level association statistics for all ancestry groups (African American N=2,074; East Asian N=2,165; European N=4,541; Hispanic N=1,943; South Asian N=2,217; Total N=12,940) for Mask 4 (PTV + NS<sub>broad</sub>).**

| Samples    | No. variants;<br>MAC control /<br>case | Max. single-marker<br>MAC (%) | SKAT-O<br>p-value    | Top single-<br>marker p-value |
|------------|----------------------------------------|-------------------------------|----------------------|-------------------------------|
| Afr. Amer. | 23; 25/25                              | 12 (24)                       | 0.83                 | 0.13                          |
| E. Asian   | 18; 15.2/10                            | 3 (11.9)                      | 0.68                 | 0.11                          |
| European   | 24; 21/17                              | 6 (15.8)                      | 0.51                 | 0.062                         |
| Hispanic   | 12; 5/10.5                             | 3 (19.4)                      | 0.22                 | 0.068                         |
| S. Asian   | 21; 19/45                              | 38 (59.4)                     | 7.2x10 <sup>-6</sup> | 7.5x10 <sup>-6</sup>          |
| All        | 81; 85.3/107.6                         | 38 (19.7)                     | 1.9x10 <sup>-5</sup> | 7.5x10 <sup>-6</sup>          |

Supplementary Table 15a | Exome array cohort information

| Ancestry | Study                                                                   | Citation(s)                                                                                                                                                                                                                                                                                                                                                                                                                                                                | PubMed ID(s)                           | T2D Case Ascertainment                                                                                                                                                                                                                                                                                                                                                                                                                                                                                                                              | T2D Control Ascertainment                                                                                                                                                                                                                                                                                                                             | T1D and MODY exclusion criteria                                                                                                                                                                                                                                                                                                                                                                                                                                                                             | Genotyping array                     | Calling algorithm                                              | Association covariates                     |
|----------|-------------------------------------------------------------------------|----------------------------------------------------------------------------------------------------------------------------------------------------------------------------------------------------------------------------------------------------------------------------------------------------------------------------------------------------------------------------------------------------------------------------------------------------------------------------|----------------------------------------|-----------------------------------------------------------------------------------------------------------------------------------------------------------------------------------------------------------------------------------------------------------------------------------------------------------------------------------------------------------------------------------------------------------------------------------------------------------------------------------------------------------------------------------------------------|-------------------------------------------------------------------------------------------------------------------------------------------------------------------------------------------------------------------------------------------------------------------------------------------------------------------------------------------------------|-------------------------------------------------------------------------------------------------------------------------------------------------------------------------------------------------------------------------------------------------------------------------------------------------------------------------------------------------------------------------------------------------------------------------------------------------------------------------------------------------------------|--------------------------------------|----------------------------------------------------------------|--------------------------------------------|
| European | Oxford-based UK T2D case-control                                        | Night BF et al. Twelve type 2 diabetes susceptibility loci identified through large-scale association analysis. <i>Nat Genet.</i> 2010 Jul;42(7):579-89.                                                                                                                                                                                                                                                                                                                   | 20581837, 17254423, 16362285, 17255346 | T2D cases were selected from UK Caucasian subjects who are part of the Diabetes UK Warren 2 repository. The remainder were recruited as isolated cases but these cases were compared to population-based cases) of relatively early onset and had a high proportion of T2D parents and/or siblings. T2D was defined as current prescribed treatment with antihyperglycaemic, biguanides, other oral agents and/or insulin or, in the case of individuals treated with diet alone, historical or contemporary laboratory evidence of hyperglycaemia. | T2D cases were selected without reference to T2D status and fasting glucose < 7.0 mmol/L.                                                                                                                                                                                                                                                             | Individuals with maturity-onset diabetes of the young and mitochondrial diabetes, were excluded. Other inclusion criteria included: absence of first-degree relatives with type 1 diabetes; an interval of ≥1 year between diagnosis and institution of regular insulin therapy; and negative testing for antibodies to glutamic acid decarboxylase (anti-GAD). An anti-GAD titer >10 U (corresponding to +8 SD above the mean of 88 normal control subjects) in duplicate samples was considered positive. | illumina HumanExome-12v1_A Beadchip  | illumina GenTrain version 1.0 + zCall                          |                                            |
| European | The Diabetes Audit and Research in Tayside Scotland (GoDarts)           | Morris AP et al. Large-scale association analysis provides insights into the genetic architecture and pathophysiology of type 2 diabetes. <i>Nat Genet.</i> 2012 Sep;44(9):981-90.                                                                                                                                                                                                                                                                                         | 22885922                               | Cases had T2D diagnosed between the ages of 35-70 years (inclusive). The diagnosis of diabetes was based on either current prescribed treatment with diabetes-specific medication or, in the case of individuals treated with diet alone, laboratory evidence of diabetes as defined by the WHO/S38.                                                                                                                                                                                                                                                | Controls were defined as having no diagnosis of diabetes at the time of recruitment (or subsequently), fasting glucose ≤ 7.0 mmol/L, HbA1c ≤ 6.4% and age < 80 years.                                                                                                                                                                                 | Cases were excluded if they had an established (clinical and/or molecular) diagnosis of monogenic diabetes (e.g. maturity-onset diabetes of the young, mitochondrial diabetes) or if they had been treated with regular insulin therapy within 1 year of diagnosis. No autoantibodies were measured.                                                                                                                                                                                                        | illumina HumanExome-12v1_A Beadchip  | illumina GenTrain version 1.0 + zCall                          |                                            |
| European | Prospective Investigation of the Vasculature in Uppsala Seniors (PIVUS) | Lind L et al. A comparison of three different methods to evaluate endothelium-dependent vasodilation in the elderly: the Prospective Investigation of the Vasculature in Uppsala Seniors (PIVUS) study. <i>Arterioscler Thromb Vasc Biol</i> 2005; 25:2368-2375                                                                                                                                                                                                            | 16141462                               | Known T2D or fasting whole blood glucose ≥ 6.1 mmol/L                                                                                                                                                                                                                                                                                                                                                                                                                                                                                               | Controls were defined as having no diagnosis of diabetes at the time of recruitment (or subsequently), whole blood glucose ≤ 6.0 mmol/L.                                                                                                                                                                                                              | -                                                                                                                                                                                                                                                                                                                                                                                                                                                                                                           | illumina HumanExome-12v1_A Beadchip  | illumina GenTrain version 1.0 + zCall                          |                                            |
| European | Uppsala Longitudinal Study of Adult Men (ULSAM)                         | Ingelsson, E. et al. Insulin resistance and risk of congestive heart failure. <i>Jama</i> 294, 334-41 (2005).                                                                                                                                                                                                                                                                                                                                                              | 16030278                               | Hospital discharge register-defined diabetes before 2002                                                                                                                                                                                                                                                                                                                                                                                                                                                                                            | Controls were defined as having no diagnosis of diabetes at the time of recruitment.                                                                                                                                                                                                                                                                  | -                                                                                                                                                                                                                                                                                                                                                                                                                                                                                                           | illumina HumanExome-12v1_A Beadchip  | illumina GenTrain version 1.0 + zCall                          |                                            |
| European | Metabolic Syndrome in Men Study (METSIM)                                | Silvanoska, A. et al. Changes in insulin sensitivity and insulin release in relation to glycaemia and glucose tolerance in 6,414 Finnish men. <i>Diabetes</i> 59, 1212-1221 (2009)                                                                                                                                                                                                                                                                                         | 19223598                               | T2D as classified by WHO 1997 criteria (fasting plasma glucose ≥ 7.0 mmol/L or 2-hr plasma glucose ≥ 11.1 mmol/L)                                                                                                                                                                                                                                                                                                                                                                                                                                   | NGT as classified by WHO 1997 criteria (fasting plasma glucose < 6.1 mmol/L and 2-hr plasma glucose < 7.8 mmol/L)                                                                                                                                                                                                                                     | known T1D cases excluded                                                                                                                                                                                                                                                                                                                                                                                                                                                                                    | illumina HumanExome-12v1_A Beadchip  | illumina GenTrain version 1.0 + manual review                  | age, batch                                 |
| European | FIN-DZD 2007                                                            | Kotrońa, A., Yu-Järvinen H, Männistö S, Saarikoski L, Korpi-Hyövä E, Oksa H, Saltevo J, Saarnio T, Sundvall J, Tuomi T, Perola M. Non-alcoholic and alcoholic fatty liver disease – two diseases of affluence associated with the metabolic syndrome and type 2 diabetes: the FIN-DZD Survey. <i>BMC Public Health</i> 2010; 10: 237.                                                                                                                                      | 20459722                               | T2D as classified by WHO 1999 criteria (fasting plasma glucose ≥ 7.0 mmol/L or 2-hr plasma glucose ≥ 11.1 mmol/L)                                                                                                                                                                                                                                                                                                                                                                                                                                   | NGT as classified by WHO 1999 criteria (fasting plasma glucose < 6.1 mmol/L and 2-hr plasma glucose < 7.8 mmol/L)                                                                                                                                                                                                                                     | known T1D cases excluded                                                                                                                                                                                                                                                                                                                                                                                                                                                                                    | illumina HumanExome-12v1_A Beadchip  | illumina GenCall using standard illumina cluster files + zCall | age, sex                                   |
| European | The Dose Responses to Exercise Training (DR's EXTRA) Study              | Diet, fitness and metabolic syndrome - The DR's EXTRA Study. Kouki R, Schwab U, Lakka TA, Hassinen M, Savonen K, Korhonen P, Kracler B, Rauramaa R. <i>Nutr Metab Cardiovasc Dis.</i> 2012 Jul;22(7):553-60. <i>Diab</i> 2010 Dec;24                                                                                                                                                                                                                                       | 21186108                               | T2D as classified by WHO 1999 criteria (fasting plasma glucose ≥ 7.0 mmol/L or 2-hr plasma glucose ≥ 11.1 mmol/L) or physician diagnosed                                                                                                                                                                                                                                                                                                                                                                                                            | NGT as classified by WHO 1999 criteria (fasting plasma glucose < 6.1 mmol/L and 2-hr plasma glucose < 7.8 mmol/L)                                                                                                                                                                                                                                     | known T1D cases excluded                                                                                                                                                                                                                                                                                                                                                                                                                                                                                    | illumina HumanExome-12v1_A Beadchip  | illumina GenCall using standard illumina cluster files + zCall | age, sex                                   |
| European | National FINRISK 2007 Study (FINRISK 2007)                              | Thirty-five-year trends in cardiovascular risk factors in Finland. Varlaine E, Laatikainen T, Perola M, Juolevi A, Männistö S, Sundvall J, Jousilahti P, Salonen V, Valsta L, Puska P. <i>Int J Epidemiol.</i> 2010 Apr;39(2):504-18                                                                                                                                                                                                                                       | 19999603                               | T2D as classified by WHO 1999 criteria (fasting plasma glucose ≥ 7.0 mmol/L or 2-hr plasma glucose ≥ 11.1 mmol/L)                                                                                                                                                                                                                                                                                                                                                                                                                                   | NGT as classified by WHO 1999 criteria, frequency matched to cases by birth province; BMI ≥ 18.5 kg/m <sup>2</sup> , within each birth province, prioritized samples with highest values for age + 2*BMI                                                                                                                                              | known T1D cases excluded                                                                                                                                                                                                                                                                                                                                                                                                                                                                                    | illumina HumanExome-12v1_A Beadchip  | illumina GenCall using standard illumina cluster files + zCall | age, sex                                   |
| European | Finland-United States Investigation of NIDDM Genetics (FUSION) Study    | Witte T et al. Mapping genes for NIDDM. Design of the Finland-United States Investigation of NIDDM Genetics (FUSION) Study. <i>Diabetes Care</i> 21(6), 949-958 (1998). Scott, L. et al. A genome-wide association study of type 2 diabetes in Finns detects multiple susceptibility variants. <i>Science</i> 316(5829), 1341-1345 (2007)                                                                                                                                  | 9614613, 17463248                      | T2D as classified by WHO 1999 criteria, by report of diabetes medication use, or based on medical record review                                                                                                                                                                                                                                                                                                                                                                                                                                     | NGT as classified by WHO 1999 criteria, approximately frequency matched to the cases by 5-year age category, sex, and birth province.                                                                                                                                                                                                                 | known T1D cases excluded                                                                                                                                                                                                                                                                                                                                                                                                                                                                                    | illumina HumanExome-12v1_A Beadchip  | illumina GenCall using standard illumina cluster files + zCall | age, sex                                   |
| European | Prevalence, Prediction and Prevention of Diabetes (PPP)                 | Tasikainen M, Tuomi T, Group LC. A family history of diabetes is associated with reduced physical fitness in the Prevalence, Prediction and Prevention of Diabetes (PPP) Botnia study. <i>Diabetologia</i> 2010 Aug;53(8):1709-13.                                                                                                                                                                                                                                         | 20454778                               | Diagnosis of diabetes was based on an OGTT of a history of previously known diabetes applying WHO criteria. In uncertain cases, the diagnosis was confirmed from patient records.                                                                                                                                                                                                                                                                                                                                                                   | No previously known diabetes. Free from diabetes after an OGTT applying WHO criteria.                                                                                                                                                                                                                                                                 |                                                                                                                                                                                                                                                                                                                                                                                                                                                                                                             | illumina HumanExome-12v1_A Beadchip  | Custom birdseed algorithm within batch                         | age, sex, analysis performed within batch  |
| European | Diabetes Registry Vaasa (DREVA) (Finnish)                               |                                                                                                                                                                                                                                                                                                                                                                                                                                                                            |                                        | Previous diagnosis of T2D<br>- Normal C-peptide levels<br>- No Anti-GAD antibody                                                                                                                                                                                                                                                                                                                                                                                                                                                                    | No controls are in the registry                                                                                                                                                                                                                                                                                                                       | No Anti-GAD antibody and normal C-peptide levels                                                                                                                                                                                                                                                                                                                                                                                                                                                            | illumina HumanExome-12v1_A Beadchip  | Custom birdseed algorithm within batch                         | age, sex, analysis performed within batch  |
| European | All New Diabetics in Scania (ANDIS) (Swedish)                           |                                                                                                                                                                                                                                                                                                                                                                                                                                                                            |                                        | Previous diagnosis of T2D<br>- Normal C-peptide levels<br>- No Anti-GAD antibody                                                                                                                                                                                                                                                                                                                                                                                                                                                                    | No controls are in the registry                                                                                                                                                                                                                                                                                                                       | No Anti-GAD antibody and normal C-peptide levels                                                                                                                                                                                                                                                                                                                                                                                                                                                            | illumina HumanExome-12v1_A Beadchip  | Custom birdseed algorithm within batch                         | age, sex                                   |
| European | Malmö Diet and Cancer (MDC) (Swedish)                                   | Manjer J, Carlsson S, Elmståhl S, Gullberg B, Janzon L, Lindström M, Mattiison I, Berglund G. The Malmö Diet and Cancer Study: representativity, cancer incidence and mortality in participants and non-participants. <i>Eur J Cancer Prev</i> 2001;10:489-99 and Manjer J, Elmståhl S, Janzon L, Berglund G. Invitation to a population-based cohort study: differences between subjects recruited using various strategies. <i>Scand J Public Health</i> 2002;30:103-12. | 11916347, 12028859                     | DM at baseline was defined as self-report of a physician diagnosis or use of diabetes medication or fasting whole blood glucose greater than or equal to 6.1 mmol/L (corresponding to fasting plasma glucose concentration ≥ 7.0 mmol/L).                                                                                                                                                                                                                                                                                                           | Fasting blood glucose below 6.1 mmol/L (corresponding to fasting plasma glucose concentration < 7.0 mmol/L).                                                                                                                                                                                                                                          | None                                                                                                                                                                                                                                                                                                                                                                                                                                                                                                        | illumina HumanOmniExpressExome-8v1_B | Custom birdseed algorithm within batch                         | age, sex, analysis performed within batch  |
| European | Scania Diabetes Registry (SDR) (Swedish)                                | Lindholm E, Agardh E, Tuomi T, Group L, Agardh C.D. Classifying diabetes according to the new WHO clinical stages. <i>Eur J Epidemiol</i> 2001;17: 983-9                                                                                                                                                                                                                                                                                                                   | 12380709                               | Physicians own classification into T2D, based on WHO 1985 guidelines (before 2001) or WHO 1999 guidelines (diagnosed after January 2001)                                                                                                                                                                                                                                                                                                                                                                                                            | No controls are in the registry                                                                                                                                                                                                                                                                                                                       | Presence of severe hyperglycaemia and/or ketosis at diagnosis, low fasting C-peptide levels and presence of GAD antibodies                                                                                                                                                                                                                                                                                                                                                                                  | illumina HumanExome-12v1_A Beadchip  | Custom birdseed algorithm within batch                         | age, sex, analysis performed within batch  |
| European | Nurses' Health Study (NHS)                                              | Qi L et al. Genetic variants at 2q24 are associated with susceptibility to type 2 diabetes. <i>Human Molecular Genetics</i> 2010;19(13):2706-15.                                                                                                                                                                                                                                                                                                                           | 20418489                               | Diabetes cases were defined as self-reported diabetes confirmed by a validated supplementary questionnaire. For cases before 1998, diagnosis was made using criteria consistent with those proposed by the National Diabetes Data Group. We used the American Diabetes Association diagnostic criteria for diagnosis of diabetes cases during the 1998 and 2000 cycles. A 98% of self-reported cases were confirmed by medical records review.                                                                                                      | Controls were defined as those free of diabetes at the time of diagnosis of the case and remained unaffected through follow-up                                                                                                                                                                                                                        | NA                                                                                                                                                                                                                                                                                                                                                                                                                                                                                                          | illumina HumanExome-12v1_A Beadchip  | illumina GenTrain version 1.0 + manual review                  | age                                        |
| European | Health Professional Follow-Up Study (HPFS)                              | Qi L et al. Genetic variants at 2q24 are associated with susceptibility to type 2 diabetes. <i>Human Molecular Genetics</i> 2010;19(13):2706-15.                                                                                                                                                                                                                                                                                                                           | 20418489                               | Diabetes cases were defined as self-reported diabetes confirmed by a validated supplementary questionnaire. For cases before 1998, diagnosis was made using criteria consistent with those proposed by the National Diabetes Data Group. We used the American Diabetes Association diagnostic criteria for diagnosis of diabetes cases during the 1998 and 2000 cycles. A 98% of self-reported cases were confirmed by medical records review.                                                                                                      | Controls were defined as those free of diabetes at the time of diagnosis of the case and remained unaffected through follow-up                                                                                                                                                                                                                        | NA                                                                                                                                                                                                                                                                                                                                                                                                                                                                                                          | illumina HumanExome-12v1_A Beadchip  | illumina GenTrain version 1.0 + manual review                  | age                                        |
| European | Estonian Genome Center, University of Tartu (EGCUT)                     | Leitola L, Haller T, Eakso T, Tammsou M, Alaverre H, Srieder H, Perola M, Ng PC, Mägi R, Miani L, Fradette K, Metspalu A. Cohort Profile: Estonian Biobank of the Estonian Genome Center, University of Tartu. <i>Int J Epidemiol.</i> 2014 Feb;43                                                                                                                                                                                                                         | 24518929                               | Previous diagnosis of T2D                                                                                                                                                                                                                                                                                                                                                                                                                                                                                                                           | Population based controls with fasting glucose < 7 mmol/L                                                                                                                                                                                                                                                                                             | NA                                                                                                                                                                                                                                                                                                                                                                                                                                                                                                          | illumina HumanExome-12v1_A Beadchip  | illumina GenCall + zCALL                                       | age, sex                                   |
| European | EFSCOCH and DARE                                                        | The Exeter Family Study of Childhood Health (EFSCOCH): study protocol and methodology. Knight B, Shields BM, Hattersley AT.                                                                                                                                                                                                                                                                                                                                                | 16469435                               | Type 2 diabetic individuals were ascertained from the Exeter branch of the Diabetes Alliance for Research in England (DARE) study and selected for genotyping if they were not on insulin within the first year of diagnosis and diagnosed after the age of 35 years.                                                                                                                                                                                                                                                                               | Control individuals were selected from the Exeter Family Study of Childhood Health (EFSCOCH). Male and female partners were ascertained at the time of pregnancy and included on the basis that they represent a very similar geographic distribution to the DARE case individuals, and were normoglycaemic on the basis of fasting glucose of HbA1c. | age at diagnosis 35 years of over. Not on insulin for first year of diagnosis.                                                                                                                                                                                                                                                                                                                                                                                                                              | illumina HumanExome-12v1_A Beadchip  | illumina + zCall                                               | age and sex                                |
| European | Cooperative Health Research in the Region of Augsburg (KORA)            | Holle R, Happich M, Löwel H, Wichmann HE. MONICA/KORA Study Group. KORA - a research platform for population based health research. <i>Gesundheitswesen.</i> 2005 Aug;67 Suppl 1:S19-25. Wichmann, H.E., Gieger C, & Illig T. KORA-gen-resource for population genetics, controls and a broad spectrum of disease phenotypes. <i>Gesundheitswesen</i> 67, Suppl. 1, S28-S30 (2005).                                                                                        | 16032513, 16032514                     | Previous diagnosis of T2D, or both fasting and 2-hr criteria met for new T2D diagnosis (WHO 1999 criteria)<br>- Family history of diabetes (parents, aunts, children, grandparents, avuncular, cousins)<br>- Unrelated individuals based IBS analyses                                                                                                                                                                                                                                                                                               | - No diagnosis of T2D<br>- Normal glucose tolerance at baseline<br>- Unrelated samples                                                                                                                                                                                                                                                                | -                                                                                                                                                                                                                                                                                                                                                                                                                                                                                                           | illumina HumanExome-12v1_A Beadchip  | illumina GenTrain + zCall                                      | age, sex                                   |
| European | Danish T2D case-control                                                 | Albrechtsen, A. et al. Exome sequencing-driven discovery of coding polymorphisms associated with common metabolic phenotypes. <i>Diabetologia</i> 56, 298-310 (2013)                                                                                                                                                                                                                                                                                                       | 23160641                               | Screen-deleted (by fasting glucose or 2-hr glucose after OGTT) or clinical onset type 2 diabetes (WHO 1999 criteria)                                                                                                                                                                                                                                                                                                                                                                                                                                | Population-based sampled with fasting glucose < 6.1 mmol/L and 2-hr glucose < 7.8 (if measured) (WHO 1999 criteria)                                                                                                                                                                                                                                   | Fasting C-peptide <150 pmol/L                                                                                                                                                                                                                                                                                                                                                                                                                                                                               | illumina HumanExome-12v1_A Beadchip  | illumina GenTrain version 1.0 + zCall                          | age, sex, (BMI)                            |
| European | SLACIER                                                                 | Hallmans, G. et al. Cardiovascular disease and diabetes in the Northern Sweden Health and Disease Study Cohort - evaluation of risk factors and their interactions. <i>Scand J Public Health Suppl.</i> 2003; 61: p. 18-24.                                                                                                                                                                                                                                                | 14660243                               | Participants with incident type 2 diabetes were identified from the Diabetes Register in Northern Sweden (DiabNorth) Web: <a href="http://www.diabetesregister.se/en/about-diabnorth-and-the-diabetes-register">http://www.diabetesregister.se/en/about-diabnorth-and-the-diabetes-register</a>                                                                                                                                                                                                                                                     | - Fasting glucose < 6.6 mmol/L                                                                                                                                                                                                                                                                                                                        | -                                                                                                                                                                                                                                                                                                                                                                                                                                                                                                           | illumina HumanExome Beadchip 12 v1.1 | illumina GenTrain + zCall                                      | age, sex, 1-10 principal components, (BMI) |
| European | EPIC-Norfolk (T2D cases) and the Finland study (cohort)                 | Day, N. et al. EPIC-Norfolk study design and characteristics of the cohort. <i>European Prospective Investigation of Cancer. British Journal of Cancer</i> 80 (Suppl 1), 95-103 (1999). Rolfe, E. et al. Association between birth weight and visceral fat in adults. <i>Acta Oncol</i> 50(2), 347-52 (2010)                                                                                                                                                               | 10466767, 20519560                     | Clinically diagnosed incident cases of T2D from the EPIC-Norfolk study and prevalent undiagnosed T2D in the Finland study based on fasting glucose ≥ 7.0 mmol/L and/or 2hZGU ≥ 11.1 mmol/L.                                                                                                                                                                                                                                                                                                                                                         | Random sample of population-based Finland study with FG < 7.0 mmol/L and 2hZGU < 11.1 mmol/L.                                                                                                                                                                                                                                                         | NA                                                                                                                                                                                                                                                                                                                                                                                                                                                                                                          | illumina HumanExome-12v1_A Beadchip  | illumina GenCall + zCall                                       | age, sex, (BMI)                            |

Supplementary Table 15b | Exome array sample characteristics

| Ancestry | Study                                                                   | N Total | Cases  |               |                                  |                                  |                                   | Controls  |                |                                  |                                  |
|----------|-------------------------------------------------------------------------|---------|--------|---------------|----------------------------------|----------------------------------|-----------------------------------|-----------|----------------|----------------------------------|----------------------------------|
|          |                                                                         |         | N Case | # Females (%) | Mean age (SD), years             | Mean BMI (SD), kg/m <sup>2</sup> | Mean age of diagnosis (SD), years | N Control | # Females (%)  | Mean age (SD), years             | Mean BMI (SD), kg/m <sup>2</sup> |
| European | Oxford-based UK T2D case-control                                        | 12743   | 1861   | 767 (51.7)    | F: 53.3 (11.4)<br>M: 53.1 (10.3) | F: 34.1 (7.2)<br>M: 31.2 (5.6)   | F: NA<br>M: NA                    | 10882     | 5623 (41.2)    | F: 48.5 (9.0)<br>M: 50.7 (7.7)   | F: 25.9 (5.0)<br>M: 27.2 (4.0)   |
| European | The Diabetes Audit and Research in Tayside Scotland (GoDarts)           | 3508    | 1715   | 682 (39.8)    | F: 64.2 (9.4)<br>M: 63.2 (9.4)   | F: 33.3 (6.9)<br>M: 31.5 (5.8)   | F: NA<br>M: NA                    | 1793      | 820 (45.7)     | F: 57.9 (11.4)<br>M: 59.5 (11.0) | F: 26.6 (4.8)<br>M: 27.3 (4.0)   |
| European | Prospective Investigation of the Vasculature in Uppsala Seniors (PIVUS) | 961     | 111    | 46 (41.1)     | F: 70.2 (0.1)<br>M: 70.1 (0.1)   | F: 29.9 (6.7)<br>M: 26.6 (3.8)   | F: NA<br>M: NA                    | 850       | 428 (50.3)     | F: 70.3 (0.15)<br>M: 70.1 (0.17) | F: 26.8 (4.6)<br>M: 28.6 (3.8)   |
| European | Uppsala Longitudinal Study of Adult Men (ULSAM)                         | 1101    | 160    | 0 (0)         | F: NA<br>M: 71.0 (0.7)           | F: NA<br>M: 28.0 (4.0)           | F: NA<br>M: NA                    | 941       | 0 (0)          | F: NA<br>M: 71.0 (0.63)          | F: NA<br>M: 25.9 (3.2)           |
| European | Metabolic Syndrome in Men Study                                         | 5158    | 773    | 0 (0)         | F: 0 (0)<br>M: 60.7 ( 6.7)       | F: 0 (0)<br>M: 29.9 (5.2)        | F: 0 (0)<br>M: NA                 | 4385      | 0 (0)          | F: 0 (0)<br>M: 57.1 (7.2)        | F: 0 (0)<br>M: 26.2 (3.5)        |
| European | FIN-D2D 2007                                                            | 2026    | 646    | 274 (42.4)    | F: 64.0 (7.1)<br>M: 63.9 (7.5)   | F: 31.5 (6.0)<br>M: 29.8 (4.9)   | F: 61.2 (10.4)<br>M: 60.4 (9.0)   | 1380      | 827 (59.9)     | F: 58.3 (8.1)<br>M: 58.7 (8.3)   | F: 26.1 (4.8)<br>M: 26.2 ( 3.6)  |
| European | The Dose Responses to Exercise Training (DR's EXTRA) Study              | 558     | 81     | 45 (55.5)     | F: 66.8 (5.7)<br>M: 68.2 (6.2)   | F: 31.9 (5.4)<br>M: 30.1 (4.6)   | F: NA<br>M: NA                    | 477       | 360 (75.4)     | F: 65.5 (5.1)<br>M: 66.9 (6.3)   | F: 26.7 (4.5)<br>M: 26.3 (3.2)   |
| European | National FINRISK 2007 Study (FINRISK 2007)                              | 2606    | 1112   | 443 (39.8)    | F: 61.4 (8.3)<br>M: 59.4 ( 9.4)  | F: 31.9 (6.1)<br>M: 30.3 (4.3)   | F: 58.3 (10.2)<br>M: 56.8 (10.0)  | 1494      | 682 (45.6)     | F: 62.5 (7.0)<br>M: 60.0 (7.9)   | F: 28.3 (4.8)<br>M: 27.3 (3.4)   |
| European | Finland-United States Investigation of NIDDM Genetics (FUSION) Study    | 1467    | 981    | 439 (44.7)    | F: 63.8 (7.9)<br>M: 62.0 (7.3)   | F: 31.0 (5.3)<br>M: 29.3 (4.4)   | F: 54.9 (8.7)<br>M: 53.6 ( 8.0)   | 486       | 270 (55.5)     | F: 62.6 (8.2)<br>M: 62.3 (9.4)   | F: 26.4 (4.0)<br>M: 26.1 (3.5)   |
| European | Prevalence, Prediction and Prevention of diabetes (PPP) (Finnish)       | 4969    | 311    | 127 (41)      | F: 64.0 (10.8)<br>M: 61.4 (12.5) | F: 30.1 (5.5)<br>M: 30.1 (5.0)   | F: 55.8 (15.4)<br>M: 52.6 (12.9)  | 4658      | 2505 (54)      | F: 48.8 (15.6)<br>M: 48.6 (15.5) | F: 25.9 (4.7)<br>M: 26.7 (3.8)   |
| European | DIREVA (Diabetes Registry Vaasa) (Finnish)                              | 2601    | 2601   | 1147 (44)     | F: 67.3 (10.8)<br>M: 65.8 (10.1) | F: 31.3 (5.6)<br>M: 30.2 (5.2)   | F: NA<br>M: 58.6 (10.3)           | 0         | F: NA<br>M: NA | F: NA<br>M: NA                   | F: NA<br>M: NA                   |
| European | Malmö Diet and Cancer (MDC) (Swedish)                                   | 5613    | 440    | 192 (43)      | F: 60.3 (5.3)<br>M: 58.7 (5.8)   | F: 30.4 (5.0)<br>M: 29.4 (4.6)   | F: NA<br>M: NA                    | 5173      | 3080 (55)      | F: 57.3 (5.9)<br>M: 57.3 (6.0)   | F: 26.3 (4.1)<br>M: 26.9 (3.5)   |
| European | All New Diabetics In Scania (ANDIS) (Swedish)                           | 1928    | 1928   | 776 (40)      | F: 62.9 (11.6)<br>M: 61.6 (11.3) | F: 32.9 (5.7)<br>M: 31.6 (4.9)   | F: 62.7 (11.5)<br>M: 61.4 (11.2)  | 0         | F: NA<br>M: NA | F: NA<br>M: NA                   | F: NA<br>M: NA                   |
| European | Scania Diabetes Registry (SDR) (Swedish)                                | 3192    | 3192   | 1312 (41)     | F: 62.6 (13.2)                   | F: 30.5 (6.2)                    | F: 56.9 (14.0)                    | 0         | F: NA          | F: NA                            | F: NA                            |
| European | Nurses' Health Study (NHS)                                              | 3088    | 1334   | 100 (100)     | F: 43.4 (6.7)<br>M: NA           | F: 27.3 (4.9)<br>M: NA           | F: NA<br>M: NA                    | 1754      | 100 (100)      | F: 43.2 (6.7)<br>M: NA           | F: 23.9 (3.0)<br>M: NA           |
| European | Health Professional Follow-Up Study (HPFS)                              | 2411    | 1113   | 0 (0)         | F: NA<br>M: 55.5 (8.5)           | F: NA<br>M: 27.8 (4.0)           | F: NA<br>M: NA                    | 1298      | 0 (0)          | F: NA<br>M: 55.5 (8.4)           | F: NA<br>M: 25.0 (2.7)           |
| European | Estonian Genome Centre, University of Tartu (EGCUT)                     | 2388    | 882    | 385 (43.7)    | F: 62.0 (11.2)<br>M: 64.7 (10.8) | F: 31.6 (5.0)<br>M: 32.6 (5.6)   | NA<br>NA                          | 1506      | 666 (44.2)     | F: 47.2 (16.8)<br>M: 46.8 (17.2) | F: 27.0 (4.1)<br>M: 26.4 (5.3)   |
| European | EFSOCH and DARE                                                         | 3013    | 1446   | 564 (39.1)    | F: 66.2 (9.02)<br>M: 65.9 (8.9)  | F: 32.1 (6.2)<br>M: 30.6 (5.2)   | F: N/A<br>M: N/A                  | 1567      | 815 (52.3)     | F: 30.4 (5.3)<br>M: 32.9 (5.9)   | F: 28.01 (4.6)<br>M: 26.6 (3.9)  |
| European | Cooperative Health Research in the Region of Augsburg [KORA]            | 3738    | 959    | 434 (45.3)    | F: 62.7 (8.6)<br>M: 61.2 (8.7)   | F: 32.1 (5.7)<br>M: 30.1 (4.7)   | F: NA<br>M: NA                    | 2779      | 1436 (51.7)    | F: 48.0 (13.1)<br>M: 48.8 (13.2) | F: 26.5 (5.0)<br>M: 27.3 (3.7)   |
| European | Danish T2D case-control                                                 | 10860   | 5864   | 2343 (40.0)   | F: 61.2 (9.6)<br>M: 61.4 (8.8)   | F: 31.2 (6.2)<br>M: 30.2 (4.9)   | F: 54.9 (10.7)<br>M: 54.2 (10.0)  | 4996      | 2716 (54.4)    | F: 45.3 (7.9)<br>M: 45.3 (7.9)   | F: 25.0 (4.4)<br>M: 26.1 (3.6)   |
| European | GLACIER                                                                 | 1925    | 960    | 457 (47.60%)  | F: 55.2 (6.7)<br>M: 54.3 (7.5)   | F: 30.6 (5.4)<br>M: 29.5 (4.2)   | NA<br>NA                          | 965       | 526 (54.51%)   | F: 50.5 (7.7)<br>M: 49.6 (8.5)   | F: 25.4 (5.5)<br>M: 26.1 (4.4)   |
| European | EPIC-Norfolk (T2D cases) and the Fenland study (cohort)                 | 1848    | 691    | 324 (47%)     | F: 52.7 (9.9)<br>M: 53.9 (10.1)  | F: 27.6 (5.7)<br>M: 28.1 (4.0)   | F: 68.5 (8.4)<br>M: 68.3 (8.3)    | 1157      | 631 (54.5%)    | F: 48.5 (7.3)<br>M: 48.2 (7.3)   | F: 26.5 (5.6)<br>M: 27.3 (4.0)   |

**Supplementary Figure 16 | Overlap of variants detected in 12,940 trans-ethnic exomes and genotyped on exome array in 79,854 Europeans.** Each blue bar indicates the number of coding SNVs, protein-altering SNVs (nonsense, essential splice site, and missense variants), or MAF > 0.5% protein-altering variants observed in 12,940 sequenced samples, broken down by ancestry (African American N=2,074; East Asian N=2,165; European N=4,541; Hispanic N=1,943; South Asian N=2,217). Red bars indicate the numbers of sequence variants that were observed in 79,854 European exome array samples. Exact counts are shown in the table on the right. While a small fraction of all coding variants are represented on exome array, 81.6% of European protein-altering variants with MAF >0.5% are captured using the array.



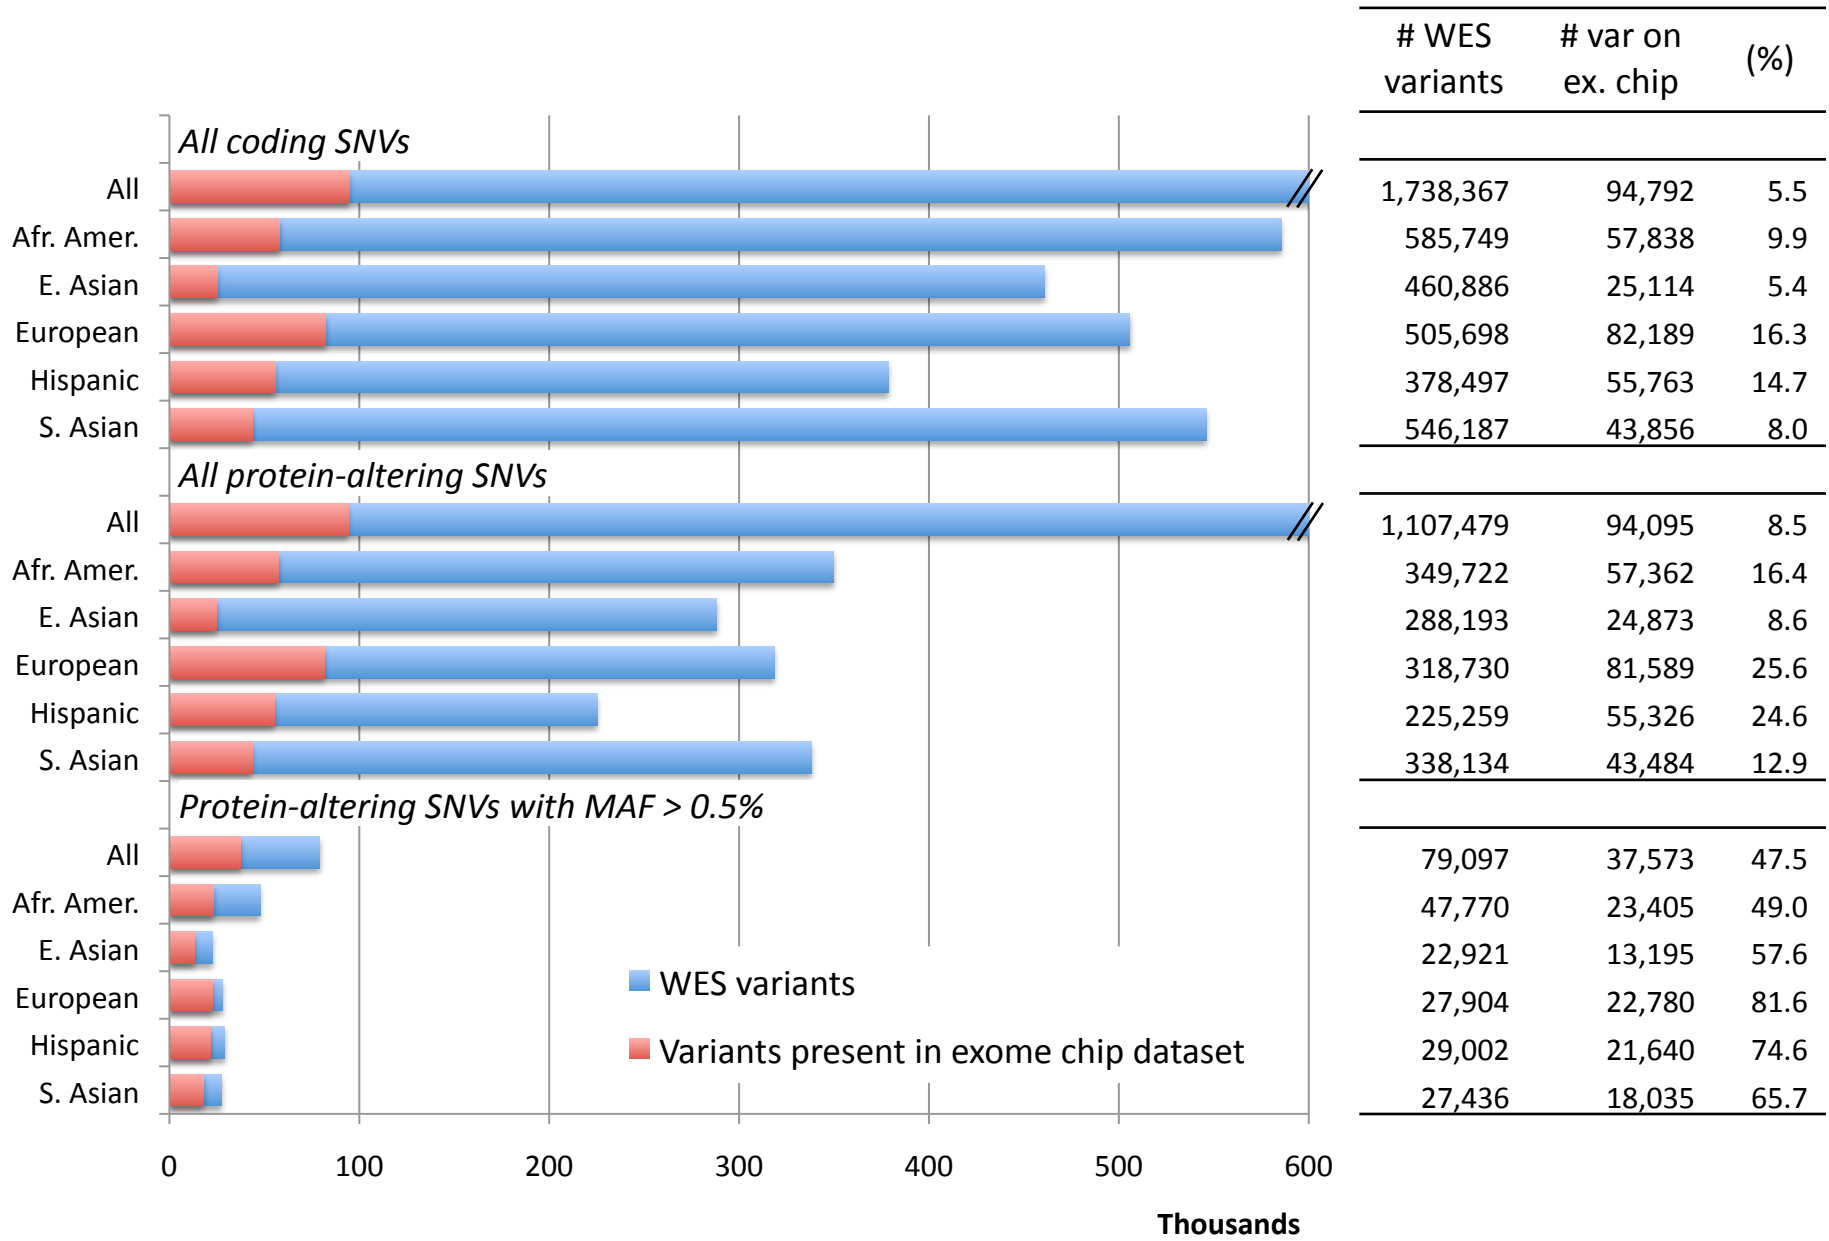

**Supplementary Figure 17 | Unconditional regional association plots for coding variants from GoT2D consortium data (N=2,657).** Each plot shows the p-value (on a  $-\log_{10}$  scale) as a function of genomic position (NCBI Build 37) covering a 2-Mb window around the novel exome-wide significant coding variant (indicated by the purple symbol). The color-coding of all other SNPs indicates LD with the novel coding SNP estimated from GoT2D data: red,  $r^2 \geq 0.8$ ; gold,  $0.6 \leq r^2 < 0.8$ ; green,  $0.4 \leq r^2 < 0.6$ ; cyan,  $0.2 \leq r^2 < 0.4$ ; blue,  $r^2 < 0.2$ ; gray,  $r^2$  unknown. Recombination rates are estimated from Phase II HapMap, and gene annotations are taken from the UCSC genome browser. Imputation quality was modest for rs60980157 (*GSPM1*) and rs9379084 (*RREB1*) (both  $r^2=0.84$ ) and high for all other novel coding SNPs ( $r^2>0.99$ ).

*GCKR* (rs1260326)

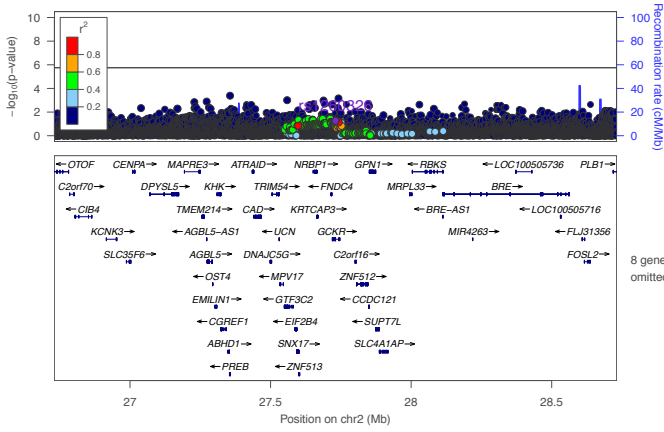

*COBL1* (rs7607980)

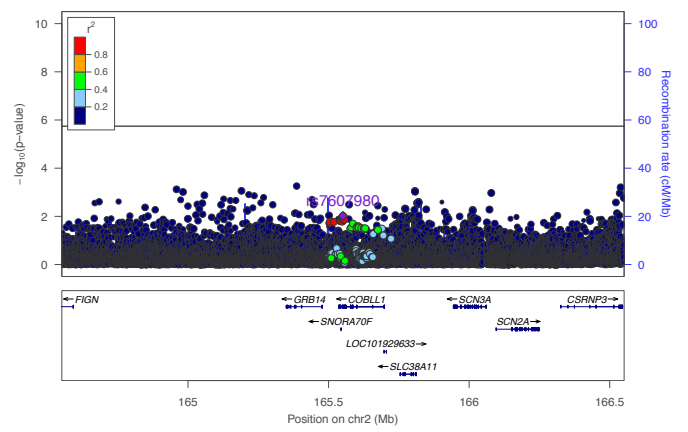

*PPARG* (rs1801282)

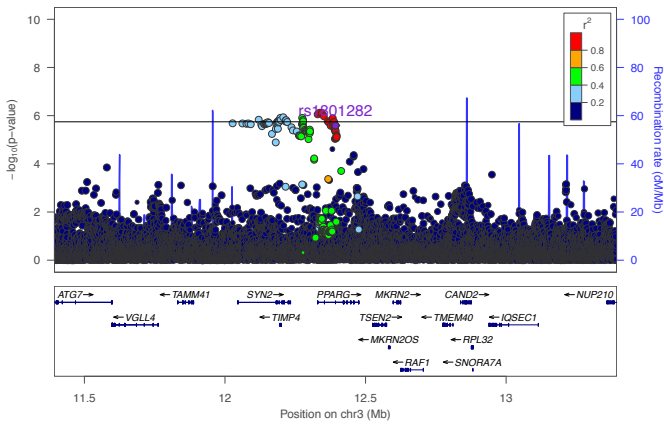

*WFS1* (rs1801212)

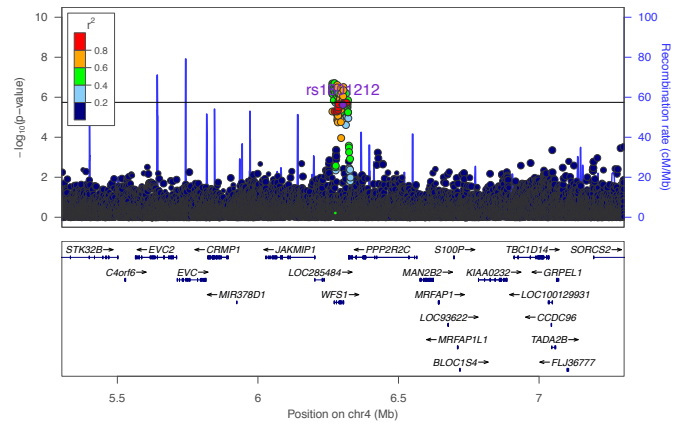

*WFS1* (rs1801214)

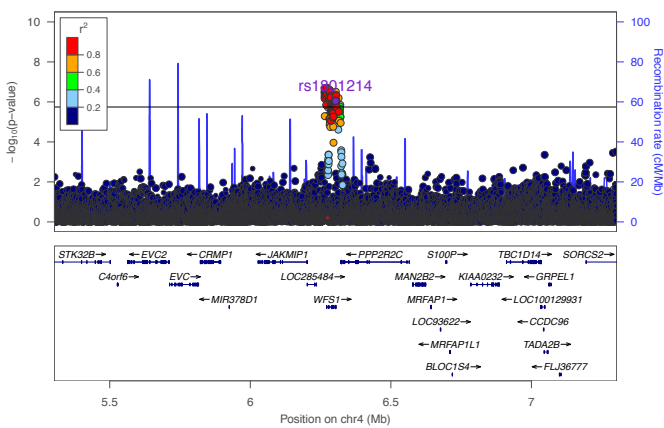

*WFS1* (rs734312)

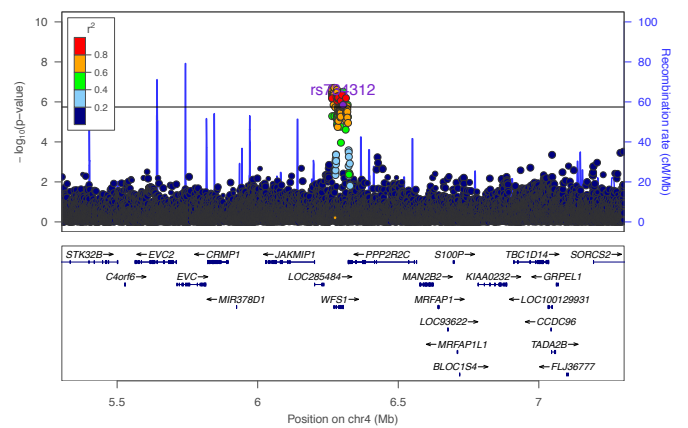

**PAM (rs35658696)**

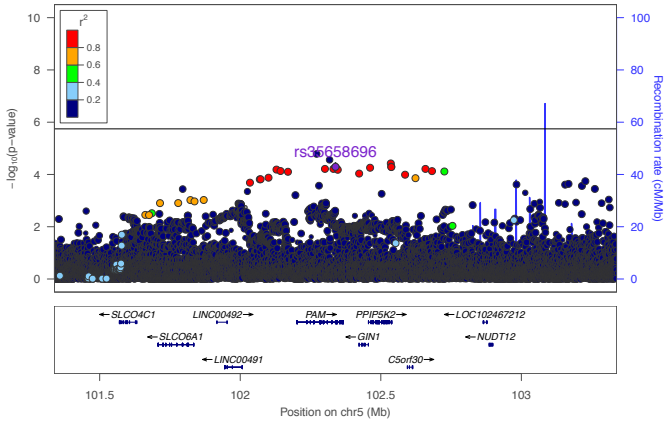

**PPI5K2 (rs36046591)**

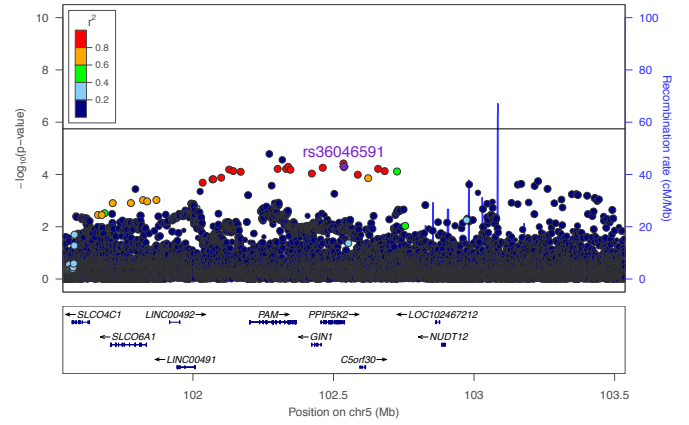

**RREB1 (rs9379084)**

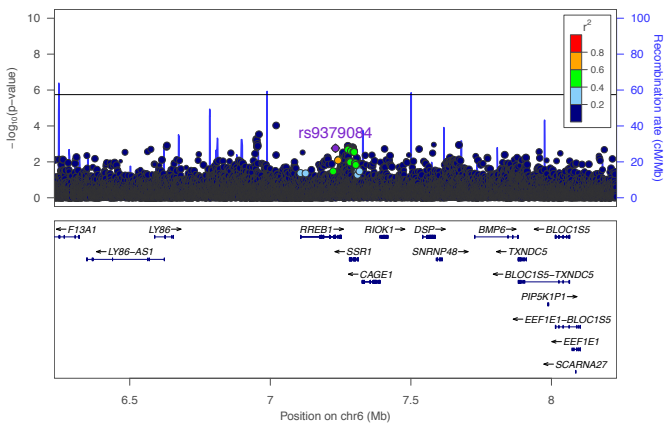

**SLC30A8 (rs13266634)**

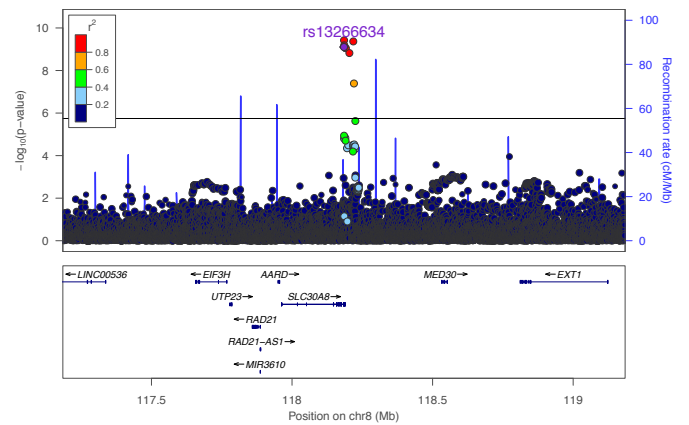

**GP5M1 (rs60980157)**

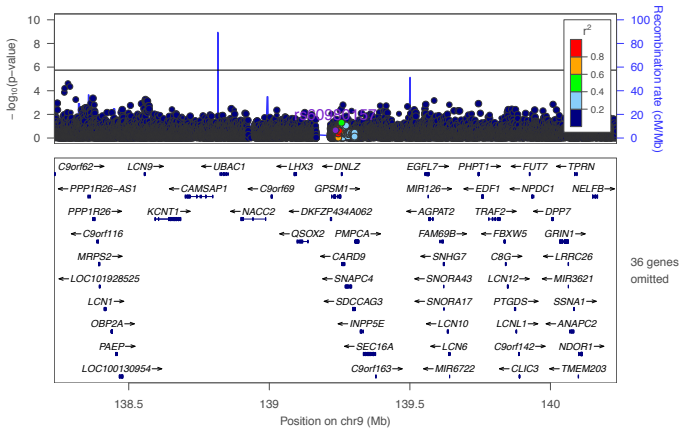

**ABCC8 (rs757110)**

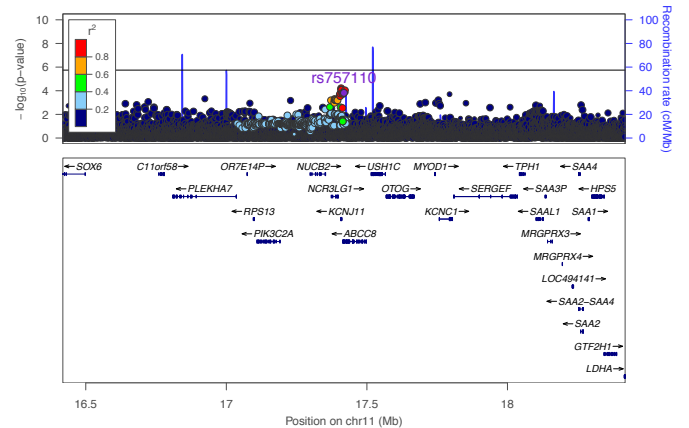

ASCC2 (rs36571)

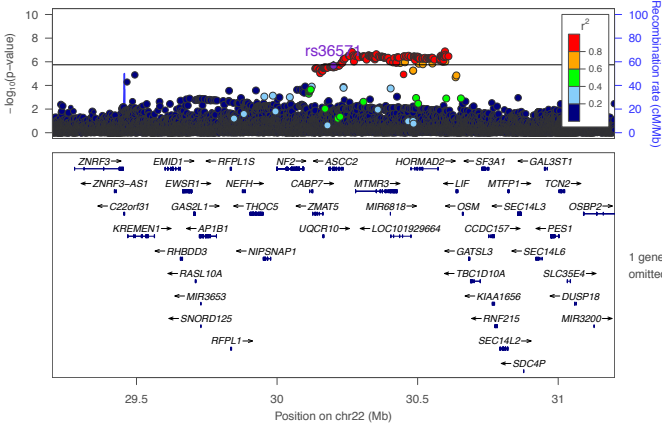

ASCC2 (rs28265)

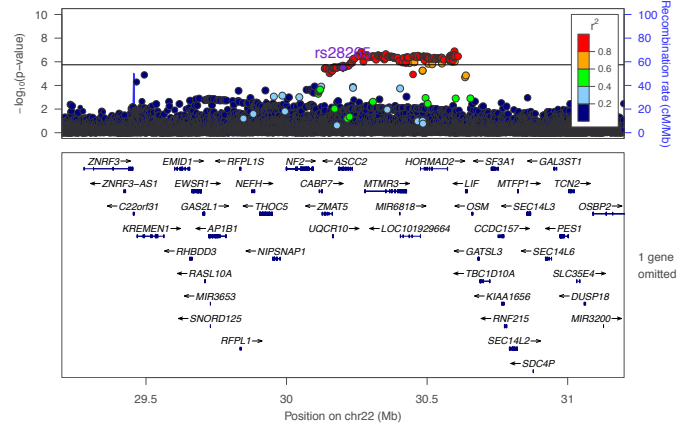

ASCC2 (rs11549795)

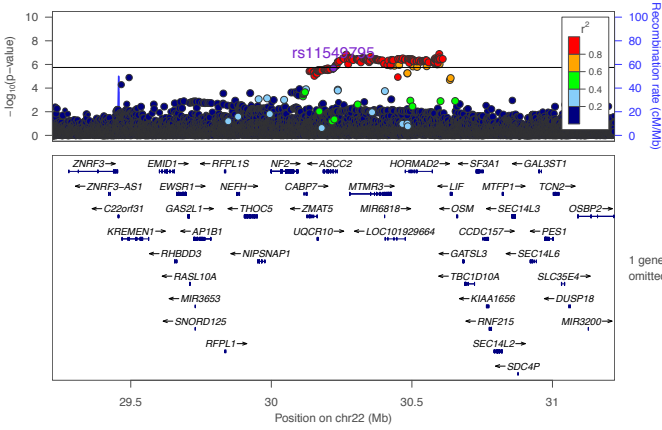

MTMR3 (rs41278853)

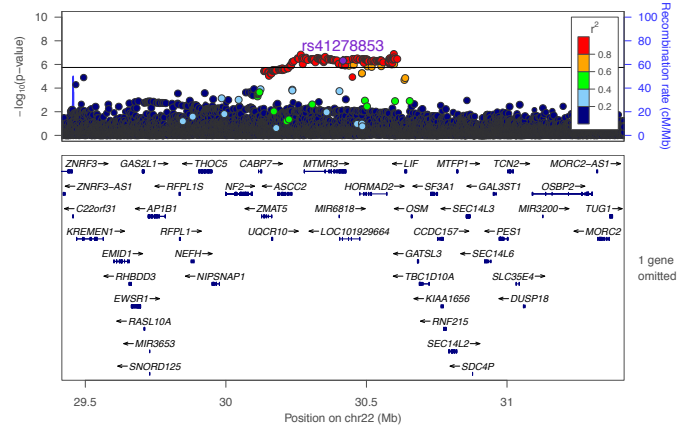

Supplementary Table 18 | Association summary statistics for coding variants in GWAS regions from previous European ancestry meta-analysis from the DIAGRAM consortium.

| Locus               | rsID       | Change     | Combined exomes       |        | Exome-array           |        | GWAS (Morris et al. 2012) |        | GWAS + MetaboChip (Morris et al. 2012) |        | Comments                                                                                                 |
|---------------------|------------|------------|-----------------------|--------|-----------------------|--------|---------------------------|--------|----------------------------------------|--------|----------------------------------------------------------------------------------------------------------|
|                     |            |            | p-value               | N      | p-value               | N      | p-value                   | N      | p-value                                | N      |                                                                                                          |
| <b>PAM/PIIP5K2</b>  | rs35658696 | Asp563Gly  | $5.7 \times 10^{-10}$ | 67,171 | $1.7 \times 10^{-7}$  | 66,047 | NA                        | NA     | NA                                     | NA     | Lead coding SNP from exome-array meta-analysis                                                           |
|                     | rs36046591 | Ser1207Gly | $3.3 \times 10^{-8}$  | 65,569 | $1.0 \times 10^{-5}$  | 62,201 | NA                        | NA     | NA                                     | NA     |                                                                                                          |
|                     | rs7729395  | non-coding | NA                    | NA     | NA                    | NA     | 0.008                     | 63,390 | $1.0 \times 10^{-5}$                   | 80,645 | Best proxy for the lead coding variant in Morris et al. (2012) ( $r^2=0.79$ )                            |
| <b>MTMR3/ASCC2</b>  | rs41278853 | Asn960Ser  | $5.6 \times 10^{-9}$  | 82,784 | $3.2 \times 10^{-5}$  | 79,852 | NA                        | NA     | NA                                     | NA     | Lead coding SNP from exome-array meta-analysis                                                           |
|                     | rs11549795 | Val123Ile  | $1.0 \times 10^{-7}$  | 82,784 | $2.0 \times 10^{-5}$  | 79,854 | 0.0025                    | 32,933 | NA                                     | NA     |                                                                                                          |
|                     | rs28265    | Asp407His  | $1.1 \times 10^{-7}$  | 82,784 | $1.9 \times 10^{-5}$  | 79,849 | 0.0004                    | 63,390 | NA                                     | NA     |                                                                                                          |
|                     | rs36571    | Pro423Ser  | $3.0 \times 10^{-7}$  | 82,784 | $2.0 \times 10^{-5}$  | 79,854 | 0.00041                   | 63,390 | NA                                     | NA     |                                                                                                          |
|                     | rs16988333 | non-coding | NA                    | NA     | NA                    | NA     | 0.00012                   | 65,812 | $3.7 \times 10^{-6}$                   | 82,788 | Best proxy for the lead coding variant in Morris et al. (2012) ( $r^2=1$ )                               |
|                     | rs5997539  | non-coding | NA                    | NA     | NA                    | NA     | $7.7 \times 10^{-5}$      | 69,033 | $7.7 \times 10^{-6}$                   | 80,480 | Lead SNP from Morris et al. (2012) ( $r^2=0.74$ with lead coding variant)                                |
| <b>WFS1</b>         | rs1801214  | Asn500Asn  | $1.5 \times 10^{-14}$ | 82,784 | $2.0 \times 10^{-12}$ | 79,854 | $1.3 \times 10^{-8}$      | 63,390 | $3.3 \times 10^{-15}$                  | 80,640 | Lead coding SNP from exome-array meta-analysis                                                           |
|                     | rs1801212  | Val333Ile  | $9.0 \times 10^{-14}$ | 82,784 | $9.3 \times 10^{-12}$ | 79,852 | $9.3 \times 10^{-5}$      | 69,033 | $3.6 \times 10^{-11}$                  | 83,539 |                                                                                                          |
|                     | rs734312   | Arg611His  | $6.9 \times 10^{-11}$ | 82,783 | $1.3 \times 10^{-10}$ | 79,852 | $3.2 \times 10^{-7}$      | 63,390 | $5.5 \times 10^{-11}$                  | 77,231 |                                                                                                          |
|                     | rs4689388  | non-coding | NA                    | NA     | $2.3 \times 10^{-11}$ | 79,854 | $3.3 \times 10^{-7}$      | 63,390 | $2.1 \times 10^{-12}$                  | 77,732 |                                                                                                          |
|                     | rs4458523  | non-coding | NA                    | NA     | NA                    | NA     | $2.0 \times 10^{-7}$      | 69,033 | $2.0 \times 10^{-15}$                  | 85,051 | Lead Morris et al. (2012) variant ( $r^2=1$ with lead coding SNP from exome-array analysis)              |
| <b>CILP2/TM6SF2</b> | rs58542926 | Glu167Lys  | $3.2 \times 10^{-10}$ | 82,784 | $1.9 \times 10^{-7}$  | 79,854 | NA                        | NA     | $4.2 \times 10^{-7}$                   | 54,462 | Lead coding SNP from exome-array meta-analysis                                                           |
|                     | rs10401969 | non-coding | NA                    | NA     | $4.2 \times 10^{-7}$  | 79,854 | 0.00054                   | 69,033 | $7.0 \times 10^{-9}$                   | 86,196 |                                                                                                          |
| <b>RREB1</b>        | rs9379084  | Asp1171Asn | $4.0 \times 10^{-9}$  | 56,339 | $1.1 \times 10^{-5}$  | 52,998 | NA                        | NA     | $0.0002_2$                             | 54,618 | Lead coding SNP from exome-array meta-analysis                                                           |
|                     | rs9502570  | non-coding | NA                    | NA     | NA                    | NA     | 0.00061                   | 63,390 | NA                                     | NA     | Lead SNP from Mahajan et al. (2014) ( $r^2=0.01$ with the lead coding variant from exome-array analysis) |
| <b>HNF4A</b>        | rs1800961  | Thr139Ile  | $2.9 \times 10^{-6}$  | 82,784 | $9.5 \times 10^{-7}$  | 79,854 | 0.025                     | 60,203 | $0.0002_7$                             | 76,816 | Lead coding SNP from exome-array meta-analysis                                                           |
|                     | rs4812831  | non-coding | NA                    | NA     | $4.7 \times 10^{-5}$  | 79,854 | 0.016                     | 69,033 | NA                                     | NA     | Top SNP in Koener et al. (2010) ( $r^2=0.01$ with the lead coding variant from exome-array analysis)     |
| <b>THADA</b>        | rs35720761 | Cys1650Tyr | $3.3 \times 10^{-10}$ | 82,784 | $3.5 \times 10^{-8}$  | 79,845 | NA                        | NA     | NA                                     | NA     | Lead coding SNP from exome-array meta-analysis                                                           |
|                     | rs7578597  | Thr1187Ala | $1.3 \times 10^{-5}$  | 47,251 | $5.1 \times 10^{-5}$  | 37,704 | $1.6 \times 10^{-5}$      | 63,390 | $2.0 \times 10^{-9}$                   | 78,010 |                                                                                                          |
|                     | rs10203174 | non-coding | NA                    | NA     | NA                    | NA     | $1.5 \times 10^{-6}$      | 69,033 | $9.5 \times 10^{-12}$                  | 86,197 | Lead Morris et al. (2012) variant ( $r^2=0.48$ with lead coding SNP from exome-array analysis)           |
| <b>COBL1</b>        | rs7607980  | Asn939Asp  | $8.3 \times 10^{-15}$ | 82,784 | $4.7 \times 10^{-11}$ | 79,853 | 0.0067                    | 69,033 | $2.9 \times 10^{-7}$                   | 86,195 | Lead coding SNP from exome-array meta-analysis                                                           |
|                     | rs13389219 | non-coding | NA                    | NA     | $1.9 \times 10^{-10}$ | 79,850 | 0.0096                    | 63,390 | $1.0 \times 10^{-8}$                   | 80,649 | Lead Morris et al. (2012) variant ( $r^2=0.77$ with lead coding SNP from exome-array analysis)           |
| <b>TSPAN8</b>       | rs1051334  | Ser213Ala  | $2.7 \times 10^{-6}$  | 62,197 | $3.5 \times 10^{-5}$  | 58,536 | 0.00018                   | 63,390 | $0.0004_3$                             | 80,646 | Lead coding SNP from exome-array meta-analysis                                                           |
|                     | rs4760790  | non-coding | NA                    | NA     | $8.6 \times 10^{-6}$  | 79,854 | $8.0 \times 10^{-6}$      | 63,390 | NA                                     | NA     | Lead SNP from Morris et al. (2012) ( $r^2=0.24$ with lead coding variant)                                |

Combined exomes p-values are derived from the meta-analysis of sequence and array datasets, with total sample size up to 92,794 (34,809 cases, 57,985 controls: effective sample size 82,758); smaller sample sizes reflect the fact that many variants were monomorphic in some or all of the non-European sequence cohorts. Exome-array analysis was performed in up to 79,854 samples (28,305 cases, 51,549 controls: effective sample size 69,866). Previously reported p-values from European meta-analysis are taken from Morris et al. (2012) Large-scale association analysis provides insights into the genetic architecture and pathophysiology of type 2 diabetes. *Nat Genet.* 44(9):981-90.

**Supplementary Table 19 | Association summary statistics for T2D and fasting glucose levels from exome-array and exome sequence for selected *RREB1* coding variants.**

|                                |                   | T2D association        |                |                      |                    |                      |                    |                        | Fasting glucose (adjusted for BMI) association |                |                      |                                      |                      |                    |                        |
|--------------------------------|-------------------|------------------------|----------------|----------------------|--------------------|----------------------|--------------------|------------------------|------------------------------------------------|----------------|----------------------|--------------------------------------|----------------------|--------------------|------------------------|
| <b>Asp1171Asn (rs9379084)</b>  |                   | <b>N<sub>eff</sub></b> | <b>EAF (%)</b> | <b>p-value</b>       | <b>OR (95% CI)</b> | <b>I<sup>2</sup></b> | <b>Cochran's Q</b> | <b>p<sub>het</sub></b> | <b>N</b>                                       | <b>EAF (%)</b> | <b>p-value</b>       | <b><math>\hat{\beta}</math> (SE)</b> | <b>I<sup>2</sup></b> | <b>Cochran's Q</b> | <b>p<sub>het</sub></b> |
| <b>Within-ancestry</b>         | African Americans | 2,074                  | 97.6           | 0.00033              | 2.26 (1.81-2.71)   | -                    | -                  | -                      | 508                                            | 96.9           | 0.82                 | -0.040 (0.190)                       | -                    | -                  | -                      |
|                                | East Asians       | 2,165                  | 86.6           | 0.062                | 1.20 (1.01-1.38)   | -                    | -                  | -                      | 1,104                                          | 85.7           | 0.22                 | 0.075 (0.062)                        | -                    | -                  | -                      |
|                                | Europeans         | 4,541                  | 89.5           | 0.0025               | 1.23 (1.09-1.37)   | -                    | -                  | -                      | 2,144                                          | 88.7           | 0.78                 | -0.014 (0.049)                       | -                    | -                  | -                      |
|                                | Hispanics         | 1,943                  | 92.5           | 0.21                 | 1.16 (0.92-1.41)   | -                    | -                  | -                      | 844                                            | 93.0           | 0.7                  | -0.037 (0.094)                       | -                    | -                  | -                      |
|                                | South Asians      | 2,217                  | 89.9           | 0.071                | 0.86 (0.61-1.11)   | -                    | -                  | -                      | 508                                            | 87.2           | 0.39                 | 0.085 (0.098)                        | -                    | -                  | -                      |
| <b>Meta-analysis</b>           | Exome sequence    | 12,918                 | 86.6-97.6      | 2.2x10 <sup>-5</sup> | 1.19 (1.10-1.28)   | 67.2                 | 12.2               | 0.016                  | 5,108                                          | 85.7-96.9      | 0.57                 | 0.019 (0.033)                        | 0                    | 2.2                | 0.70                   |
|                                | Exome-array       | 43,421                 | 89             | 1.1x10 <sup>-5</sup> | 1.12 (1.07-1.17)   | 2.8                  | 9.3                | 0.41                   | 24,031                                         | 88.6           | 0.0090               | 0.019 (0.007)                        | 0                    | 5.4                | 0.86                   |
|                                | Combined          | 56,339                 | 86.6-97.6      | 4.0x10 <sup>-9</sup> | 1.13 (1.09-1.18)   | 68.1                 | 12.6               | 0.014                  | 29,139                                         | 85.7-96.9      | 0.0084               | 0.034 (0.013)                        | 0                    | 2.5                | 0.78                   |
| <b>Ser1554Tyr (rs35742417)</b> |                   |                        |                |                      |                    |                      |                    |                        |                                                |                |                      |                                      |                      |                    |                        |
| <b>Within-ancestry</b>         | African Americans | 2,074                  | 78.8           | 0.87                 | 0.98 (0.83-1.13)   | -                    | -                  | -                      | 508                                            | 79.3           | 0.87                 | 0.012 (0.076)                        | -                    | -                  | -                      |
|                                | East Asians       | 2,165                  | 96.6           | 0.89                 | 0.97 (0.64-1.31)   | -                    | -                  | -                      | 1,104                                          | 96.6           | 0.91                 | -0.013 (0.120)                       | -                    | -                  | -                      |
|                                | Europeans         | 4,541                  | 82.3           | 0.023                | 1.12 (1.01-1.23)   | -                    | -                  | -                      | 2,144                                          | 80.9           | 0.28                 | 0.042 (0.039)                        | -                    | -                  | -                      |
|                                | Hispanics         | 1,943                  | 92.4           | 0.30                 | 1.11 (0.87-1.35)   | -                    | -                  | -                      | 844                                            | 92             | 0.19                 | 0.110 (0.087)                        | -                    | -                  | -                      |
|                                | South Asians      | 2,217                  | 94.4           | 0.58                 | 1.07 (0.81-1.33)   | -                    | -                  | -                      | 508                                            | 93.2           | 0.89                 | 0.018 (0.120)                        | -                    | -                  | -                      |
| <b>Meta-analysis</b>           | Exome sequence    | 12,918                 | 78.8-96.6      | 0.065                | 0.94 (0.86-1.02)   | 0                    | 3.2                | 0.53                   | 5,108                                          | 80.9-96.6      | 0.17                 | 0.041 (0.030)                        | 0                    | 1.1                | 0.90                   |
|                                | Exome-array       | 69,867                 | 79.7           | 0.00029              | 1.05 (1.02-1.08)   | 21.4                 | 15.3               | 0.23                   | 33,230                                         | 78.9           | 8.4x10 <sup>-9</sup> | 0.024 (0.004)                        | 0                    | 12.3               | 0.51                   |
|                                | Combined          | 82,784                 | 78.8-96.6      | 4.9x10 <sup>-9</sup> | 1.05 (1.02-1.08)   | 0                    | 1.5                | 0.83                   | 38,338                                         | 80.9-96.6      | 2.7x10 <sup>-9</sup> | 0.053 (0.009)                        | 0                    | 1.3                | 0.94                   |

N<sub>eff</sub>: effective sample size. EAF: effect allele frequency. OR: odds-ratio. CI: confidence interval. I<sup>2</sup>: heterogeneity measure in %. p<sub>het</sub>: p-value for Cochran's Q statistic. N: number of individuals analysed.  $\hat{\beta}$ : regression coefficient estimates. SE: standard error.

Summary statistics of just the two coding variants showing significant association signals for either T2D or fasting glucose have been summarized.

**For Supplementary Table 20 see Excel File “20Supp20 - T2D loci and genes.xlsx”**



Supplementary Table 21 | Characterization of role of coding variants within genes in established common variant GWAS regions through reciprocal conditional analysis.

| Locus         | Variant    | Combined exomes p-value | Coding variant(s) |                   |                       | GWAS variant         |                   |                   |                       | Comments             |                                                                                                                                                                                                                                                                                                                                                                                                                                                                                                                                                                                                                                                                                                                                                                      |
|---------------|------------|-------------------------|-------------------|-------------------|-----------------------|----------------------|-------------------|-------------------|-----------------------|----------------------|----------------------------------------------------------------------------------------------------------------------------------------------------------------------------------------------------------------------------------------------------------------------------------------------------------------------------------------------------------------------------------------------------------------------------------------------------------------------------------------------------------------------------------------------------------------------------------------------------------------------------------------------------------------------------------------------------------------------------------------------------------------------|
|               |            |                         | Variant           | Conditioned on    | Unconditional p-value | Conditional p-value  | Variant           | Conditioned on    | Unconditional p-value |                      | Conditional p-value                                                                                                                                                                                                                                                                                                                                                                                                                                                                                                                                                                                                                                                                                                                                                  |
| <b>THADA</b>  | Cys1605Tyr | 3.3x10 <sup>-10</sup>   | Cys1605Tyr        | unconditioned     | 0.00035               |                      | rs10203174        | unconditioned     | 5.7x10 <sup>-6</sup>  |                      | The previously reported non-coding GWAS SNP (or a close proxy) at the <i>THADA</i> locus is not available on the exome array, so approximate conditional analyses were undertaken in GCTA in a genome-wide imputed meta-analysis from the GoT2D Consortium ( <b>METHODS</b> ). Association signals for <i>THADA</i> Cys1605Tyr and the GWAS SNP at this locus are partially correlated. The association signal for the GWAS SNP is not entirely extinguished in reciprocal conditional analysis. However, the association signals for <i>THADA</i> Thr1187Ala and the GWAS SNP at this locus are indistinguishable from each other in reciprocal conditional analysis. <i>THADA</i> is a candidate effector transcript for the non-coding GWAS signal at this locus. |
|               |            |                         |                   | rs10203174        |                       | 0.92                 |                   | <b>Cys1605Tyr</b> |                       | 0.0063               |                                                                                                                                                                                                                                                                                                                                                                                                                                                                                                                                                                                                                                                                                                                                                                      |
|               |            |                         |                   | <b>Thr1187Ala</b> |                       | 0.81                 |                   |                   |                       |                      |                                                                                                                                                                                                                                                                                                                                                                                                                                                                                                                                                                                                                                                                                                                                                                      |
|               | Thr1187Ala | 1.3x10 <sup>-5</sup>    | Thr1187Ala        | unconditioned     | 5.8x10 <sup>-6</sup>  |                      | rs10203174        | unconditioned     | 5.7x10 <sup>-6</sup>  |                      |                                                                                                                                                                                                                                                                                                                                                                                                                                                                                                                                                                                                                                                                                                                                                                      |
| rs10203174    |            |                         |                   |                   | 0.37                  |                      | <b>Thr1187Ala</b> |                   | 0.46                  |                      |                                                                                                                                                                                                                                                                                                                                                                                                                                                                                                                                                                                                                                                                                                                                                                      |
|               | Thr1187Ala | 1.3x10 <sup>-5</sup>    | Thr1187Ala        | <b>Cys1605Tyr</b> |                       | 0.0053               |                   |                   |                       |                      |                                                                                                                                                                                                                                                                                                                                                                                                                                                                                                                                                                                                                                                                                                                                                                      |
| <b>TSPAN8</b> | Ser213Ala  | 2.7x10 <sup>-6</sup>    | Ser213Ala         | unconditioned     | 3.5x10 <sup>-5</sup>  |                      | rs4760790         | unconditioned     | 8.6x10 <sup>-6</sup>  |                      | Association signals for <i>TSPAN8</i> Ser213Ala and the GWAS SNP at this locus are partially correlated. The association signal for the GWAS SNP is not entirely extinguished in reciprocal conditional analysis. <i>TSPAN8</i> is a candidate effector transcript at this locus.                                                                                                                                                                                                                                                                                                                                                                                                                                                                                    |
|               |            |                         |                   | rs4760790         |                       | 0.00024              |                   | <b>Ser213Ala</b>  |                       | 0.0025               |                                                                                                                                                                                                                                                                                                                                                                                                                                                                                                                                                                                                                                                                                                                                                                      |
| <b>HNF4A</b>  | Thr139Ile  | 2.9.x10 <sup>-6</sup>   | Thr139Ile         | unconditioned     | 9.5x10 <sup>-7</sup>  |                      | rs4812831         | unconditioned     | 4.7x10 <sup>-5</sup>  |                      | Association signals for <i>HNF4A</i> Thr139Ile and the GWAS SNP at this locus are independent of each other. The association signal for the GWAS SNP is not extinguished in reciprocal conditional analysis. Previous GWAS signal is not mediated through <i>HNF4A</i> Thr139Ile.                                                                                                                                                                                                                                                                                                                                                                                                                                                                                    |
|               |            |                         |                   | rs4812831         |                       | 4.0x10 <sup>-7</sup> |                   | <b>Thr139Ile</b>  |                       | 2.4x10 <sup>-5</sup> |                                                                                                                                                                                                                                                                                                                                                                                                                                                                                                                                                                                                                                                                                                                                                                      |
|               |            |                         |                   | rs10842994        |                       | 0.18                 |                   | <b>Gly43Arg</b>   |                       | 7.7x10 <sup>-5</sup> |                                                                                                                                                                                                                                                                                                                                                                                                                                                                                                                                                                                                                                                                                                                                                                      |

Combined exomes p-values are derived from the meta-analysis of sequence and array datasets, with total sample size up to 92,794 (34,809 cases, 57,985 controls: effective sample size 82,758). Conditional analysis was performed only on the exome-array component (28,305 cases, 51,549 controls: effective sample size 69,866). However, the previously reported non-coding GWAS SNP at the *THADA* locus (rs10203174) is not available on the exome array; p-values reported here come from approximate conditional analyses undertaken in GCTA in a genome-wide imputed meta-analysis from the GoT2D Consortium (**METHODS**). We also examined genome-wide sequence and imputed data sets from the GoT2D consortium (N=2,657; **METHODS**) to determine whether these causal inferences were robust to more comprehensive coverage of regional variation.

**Supplementary Table 22 | List of monogenic analysis categories and genes**

| Monogenic ALL | Monogenic PRIMARY | Monogenic OMIM |
|---------------|-------------------|----------------|
| ABCC8         | ABCC8             | ABCC8          |
| AGPAT2        |                   |                |
| AIRE          |                   |                |
| AKT2          |                   |                |
| ALMS1         | ALMS1             |                |
| ARL6          |                   |                |
| BBS1          |                   |                |
| BBS10         |                   |                |
| BBS12         |                   |                |
| BBS2          |                   |                |
| BBS4          |                   |                |
| BBS5          |                   |                |
| BBS7          |                   |                |
| BBS9          |                   |                |
| BLK           |                   | BLK            |
| BSCL2         |                   |                |
| CAV1          |                   |                |
| CEL           | CEL               | CEL            |
| CEP290        |                   |                |
| CFTR          |                   |                |
| CIDEA         |                   |                |
| CISD2         | CISD2             |                |
| DCAF17        |                   |                |
| DMPK          |                   |                |
| EIF2AK3       | EIF2AK3           |                |
| FOXP3         |                   |                |
| GATA4         | GATA4             |                |
| GATA6         | GATA6             |                |
| GCK           | GCK               | GCK            |
| GLIS3         | GLIS3             |                |
| GLUD1         | GLUD1             |                |
| HADH          | HADH              |                |
| HNF1A         | HNF1A             | HNF1A          |
| HNF1B         | HNF1B             | HNF1B          |
| HNF4A         | HNF4A             | HNF4A          |
| INS           | INS               | INS            |
| INSR          | INSR              |                |
| ISL1          |                   |                |
| ITPR3         |                   |                |
| KCNJ11        | KCNJ11            | KCNJ11         |
| KLF11         |                   | KLF11          |
| LEP           |                   |                |
| LEPR          |                   |                |
| LMNA          | LMNA              |                |
| MC4R          |                   |                |
| MKKS          |                   |                |
| MKS1          |                   |                |
| MNX1          | MNX1              |                |
| NEUROD1       | NEUROD1           | NEUROD1        |
| NEUROG3       | NEUROG3           |                |
| PAX4          |                   | PAX4           |
| PAX6          |                   |                |
| PCNT          |                   |                |
| PCSK1         |                   |                |
| PDX1          | PDX1              | PDX1           |
| PIK3CA        |                   |                |
| PIK3R1        |                   |                |
| PLAGL1        |                   |                |
| PLIN1         |                   |                |
| POLD1         |                   |                |
| POMC          |                   |                |
| PPARG         | PPARG             |                |
| PPP1R3A       |                   |                |
| PRSS1         |                   |                |
| PTEN          |                   |                |
| PTF1A         | PTF1A             |                |
| PTRF          |                   |                |
| RFX6          | RFX6              |                |
| SH2B1         |                   |                |
| SIRT1         |                   |                |

|          |        |  |
|----------|--------|--|
| SLC16A1  |        |  |
| SLC19A2  |        |  |
| SLC2A2   | SLC2A2 |  |
| SPINK1   |        |  |
| TRIM32   |        |  |
| TTC8     |        |  |
| UCP2     | UCP2   |  |
| WFS1     | WFS1   |  |
| WRN      |        |  |
| ZFP57    |        |  |
| ZMPSTE24 |        |  |

**Supplementary Figure 23 | Age of diagnosis of variant carriers.** To assess whether individuals carrying variants in genes for monogenic forms of diabetes were enriched for patients with undiagnosed monogenic diseases, we examined the ages of diagnosis for carriers and compared them to those of non-carriers. As some diseases typically manifest at an earlier age than does T2D (e.g. MODY), a lower age of diagnosis for carriers might suggest that the monogenic phenotype, rather than late-onset T2D, is responsible for the diabetes phenotype in carriers. Shown is the mean age of diagnosis for carriers of variants in (a) the Monogenic All gene set, (b) the Monogenic Primary gene set, and (c) the Monogenic OMIM gene set. In each case, the mean ages are computed for carriers of variants in each of the five variant masks discussed in the text. Error bars indicate one standard deviation. Numbers of carriers and non-carriers for each mask are listed in parentheses at the bottom of the plot.

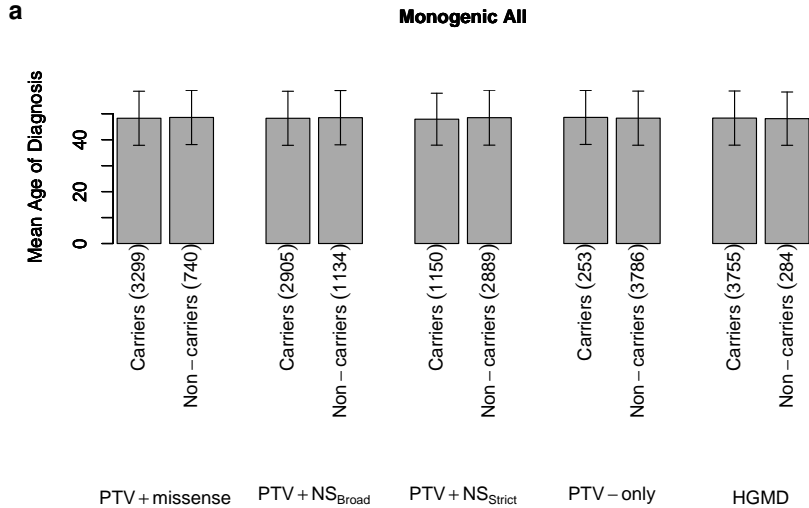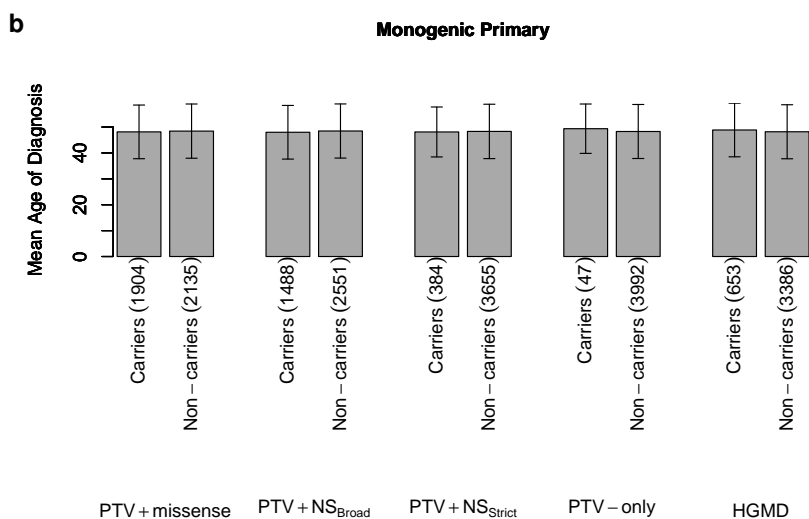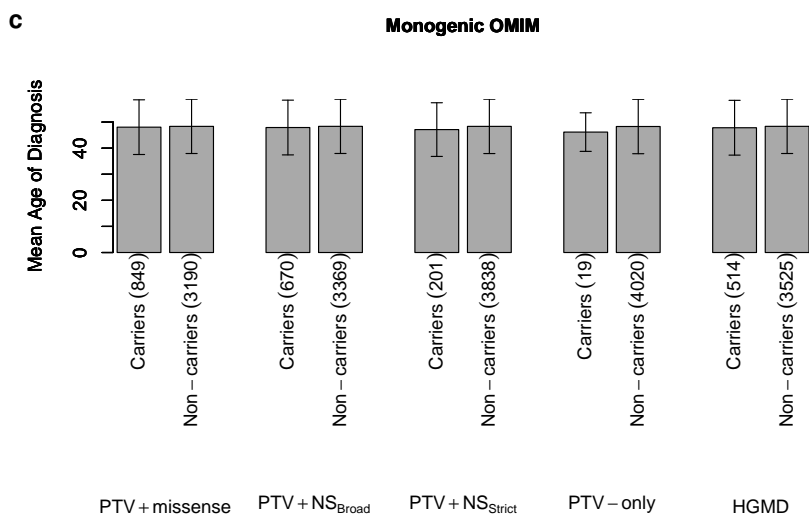

**Supplementary Figure 24 | Accumulation of ultra-rare deleterious alleles amongst genes contributing to pre-specified “biologically-driven” gene-sets.** **a**, Using the SMP approach, we confirmed association in the ‘Monogenic All’ gene set (81 genes:  $p=0.006$ ,  $OR=1.35$  for singletons;  $p=0.04$ ,  $OR=1.07$  for ultra-rare alleles) and the “Monogenic OMIM” gene set (13 genes:  $p=0.0088$ ,  $OR=2.4$  for singletons;  $p=0.02$ ,  $OR=1.82$  for ultra-rare alleles). We also detected a separate “burden” signal for increased T2D-risk attributable to singleton alleles within the MTOR pathway ( $p=0.012$ ,  $OR=3.61$ ). **b**, Individual gene-ranking of composite set genes (set genes with  $p < .05$  are shown). Genes are ranked by their case burden of rare PTVs, from top to bottom, for the Mtor and the monogenic all gene sets (labeled MTOR and MODY ALL, respectively). The squares along the bottom indicate to which sets each gene belongs. The red and blue triangles represent case and control counts for each gene. The lines represent the statistical significance of the best test for this set: that is, the significance of the top K genes, evaluated by permutation. For example, the drivers of the MTOR pathway signal include three case-only PTV singletons in both MNK1 and MTOR.

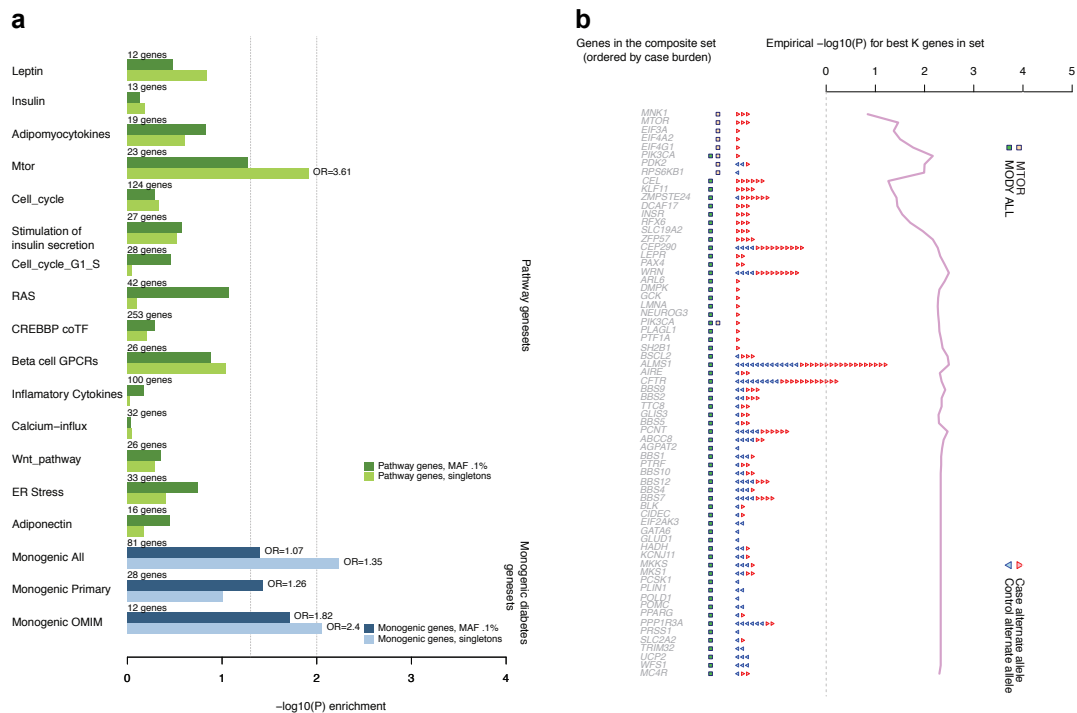

**Supplementary Table 25 | All pathway enrichment signals with uncorrected FDR  $\leq$  10% from gene-set enrichment analyses conducted on the ancestry-specific and combined exome sequence data.** Ancestries are denoted as European (EUR), East Asian (EA), South Asian (SA), Hispanic (HS) and African American (AA). For hand-curated gene-sets see **Supplementary Table 32**. We detected no study-wide significant signals (defined FDR  $<$  5% after correction for multiple testing on four masks and five gene set collections). However, we detect nominal associations (uncorrected FDR  $\leq$  10%) in a subset of analyses, as listed below.

| <b>Mask</b>              | <b>Ancestry</b> | <b>GeneSet</b>                                                                            | <b>FDR</b> |
|--------------------------|-----------------|-------------------------------------------------------------------------------------------|------------|
| PTV+NS <sub>broad</sub>  | Combined        | Transport of organic anions (Reactome)                                                    | 1.1%       |
| PTV+missense             | AA              | Cytosolic DNA sensing pathway (Kegg)                                                      | 1.4%       |
| PTV+NS <sub>strict</sub> | HS              | Glycosaminoglycan biosynthesis chondroitin sulphate (Kegg)                                | 3.1%       |
| PTV only                 | HS              | TRIF-mediated TLR3 signaling (Reactome)                                                   | 3.5%       |
| PTV+NS <sub>strict</sub> | SA              | Secretory granule (Gene Ontology)                                                         | 3.6%       |
| PTV+NS <sub>broad</sub>  | AA              | Riboflavin metabolism (Kegg)                                                              | 4.9%       |
| PTV+NS <sub>broad</sub>  | Combined        | Mendelian: long qt syndrome (hand curated)                                                | 5.1%       |
| PTV only                 | EA              | Fatty acid metabolism (Kegg)                                                              | 5.7%       |
| PTV+NS <sub>strict</sub> | EUR             | Mismatch repair (Kegg)                                                                    | 5.7%       |
| PTV+NS <sub>broad</sub>  | Combined        | Mendelian: immune (hand curated)                                                          | 5.8%       |
| PTV+NS <sub>strict</sub> | EA              | Beta alanine metabolism (Kegg)                                                            | 6.4%       |
| PTV only                 | AA              | Tak1 activates NF $\kappa$ B by phosphorylation and activation of IKKS complex (Reactome) | 6.9%       |
| PTV+NS <sub>broad</sub>  | HS              | ABC transporters (Kegg)                                                                   | 7.5%       |
| PTV+NS <sub>broad</sub>  | Combined        | Cellular polysaccharide metabolic process (Gene Ontology)                                 | 8.4%       |
| PTV+NS <sub>strict</sub> | EA              | Limonene and pinene degradation (Kegg)                                                    | 8.6%       |
| PTV+NS <sub>broad</sub>  | EA              | Integrin signaling (MSigDb Canonical Pathway)                                             | 8.9%       |
| PTV+NS <sub>strict</sub> | AA              | Triggering pathway mediating stimulation of insulin secretion (hand-curated)              | 9.5%       |
| PTV+NS <sub>strict</sub> | AA              | Lysine degradation (Kegg)                                                                 | 10.0%      |

**Supplementary Figure 26 | PPI analyses.** **A**, QQ-plot of Fisher aggregated empirical  $p$ -values (“PTV+NS<sub>strict</sub>” mask) from the 2418 clusters generated by clusterONE based on 100,000 iterations. Cluster 630, consisting of ASB (ankyrin repeat and SOC box protein) protein family members interacting with RNF7 and CUL5, showed the strongest enrichment (“PTV+NS<sub>strict</sub>” mask, empirical  $p$ -value  $P=5 \times 10^{-5}$ ); **B**, Membership of the cluster 630 sub-network highlighted by the clusterONE analyses. ASB6 is adipocyte-specific and interacts with APS to enable recruitment of elongins to the insulin receptor-signaling complex; **C**, PPI sub-network constructed using the top 15 modules generated with dmGWAS from gene-based association  $p$ -values derived using the “PTV+NS<sub>strict</sub>” variant mask. The sub-network includes the cluster of ASB proteins found in the clusterONE method as significant (cluster 630, shaded area), a cluster of mitochondrial-activity related genes, and the *PAM* gene; **D**, PPI sub-network built using the 15 top modules generated with dmGWAS from gene-based association  $p$ -values derived using the “PTV+NS<sub>broad</sub>” mask. The sub-network includes *PAM* and *FES*, both of which contain exome-wide significant coding variants associated with T2D. The darkness of the node in the sub-networks is proportional to its  $p$ -value (lighter color indicates lower  $p$ -values) and the thickness of the edge is proportional to confidence score for the interaction between each pair of proteins.

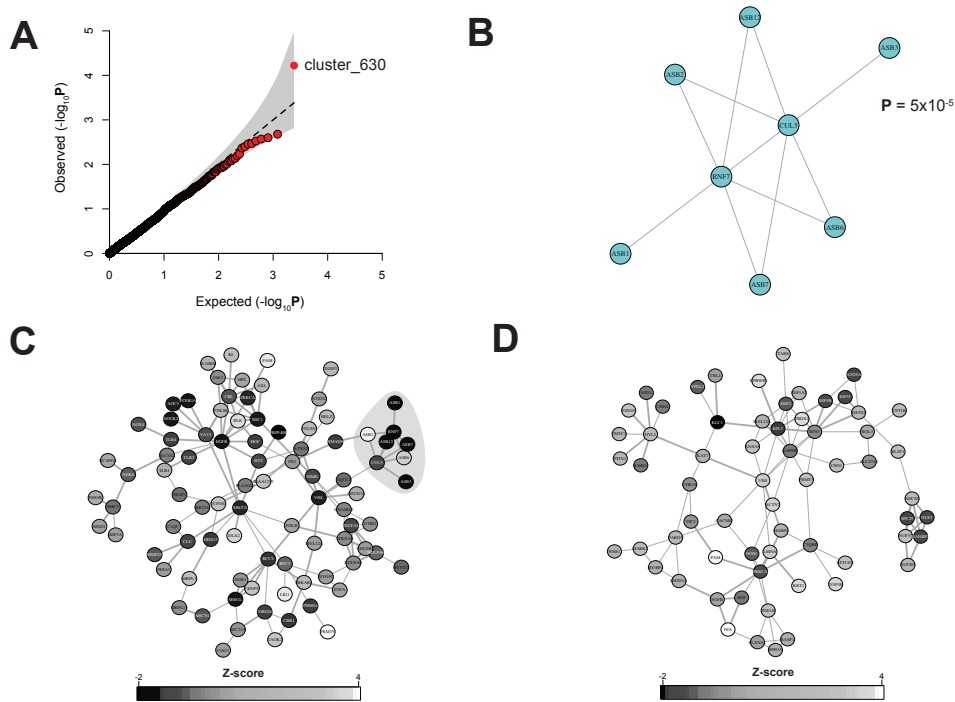



**Supplementary Figure 27 | Use of permutations to evaluate synthetic association hypothesis at 10 T2D GWAS loci.**

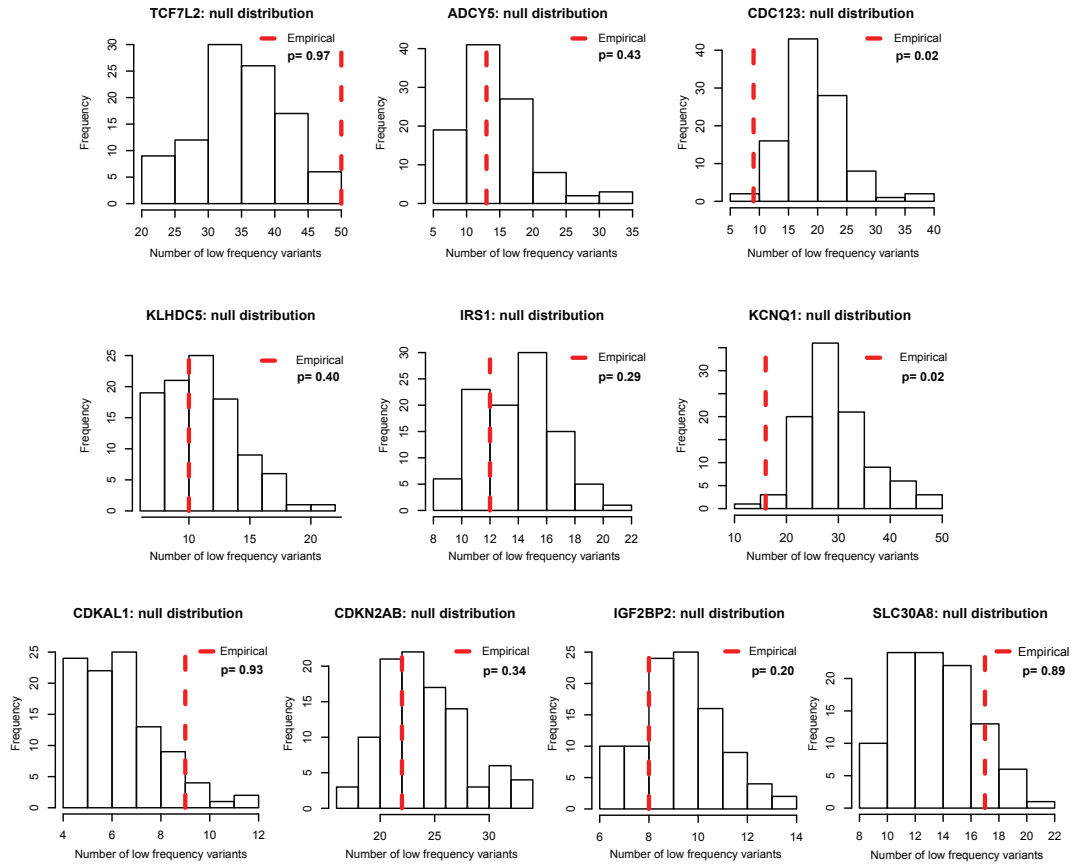

**Supplementary Table 28 | Properties of credible sets constructed at all T2D GWAS loci.** Loci are sorted by the size of the final 99% credible set (from smallest to largest; column 5 below). Up to 2 credible sets were constructed for independent signals ( $r^2 < 0.1$ ) at all previously known autosomal T2D GWAS loci. Only loci where the index SNV had MAF > 1% in the GoT2D sequencing data were included; *RBM43* and *SGCG* were excluded due to low index SNV MAF. *CILP2* was excluded due to poor sequencing quality across this region in the GoT2D experiment. At loci where the two independent signals have opposite directions of effect at the minor allele (risk, protective), the credible sets are labeled as such (“risk”, “prot”); at loci where both signals are in the same direction, they are labeled “sig1” and “sig2”.

| Locus               | # candidate variants with $r^2 > 0.1$ to GWAS tag | # indels | # imputed with low quality | # variants in 99% credible set | # missense variants in credible set | % variants in 1000G | % variants in HapMap | Post. prob. of top 5 variants | Post. prob. of top 10 variants |
|---------------------|---------------------------------------------------|----------|----------------------------|--------------------------------|-------------------------------------|---------------------|----------------------|-------------------------------|--------------------------------|
| <i>CDKN2AB_risk</i> | 16                                                | 0        | 1                          | 2                              | -                                   | 100%                | 50%                  | 1.00                          | 1.00                           |
| <i>TCF7L2</i>       | 121                                               | 8        | 0                          | 3                              | -                                   | 100%                | 33%                  | 1.00                          | 1.00                           |
| <i>CCND2</i>        | 27                                                | 4        | 1                          | 4                              | -                                   | 100%                | 25%                  | 0.99                          | 0.99                           |
| <i>ZBED3</i>        | 99                                                | 2        | 0                          | 5                              | -                                   | 100%                | 60%                  | 0.99                          | 0.99                           |
| <i>KCNQ1_sig2</i>   | 59                                                | 4        | 0                          | 5                              | -                                   | 100%                | 40%                  | 1.00                          | 1.00                           |
| <i>SLC30A8</i>      | 57                                                | 3        | 0                          | 7                              | 1                                   | 100%                | 43%                  | 0.93                          | 0.99                           |
| <i>CDKAL1</i>       | 376                                               | 33       | 1                          | 9                              | -                                   | 100%                | 56%                  | 0.74                          | 1.00                           |
| <i>CDKN2AB_prot</i> | 27                                                | 0        | 2                          | 12                             | -                                   | 100%                | 42%                  | 0.75                          | 0.96                           |
| <i>HHEX</i>         | 236                                               | 23       | 2                          | 14                             | -                                   | 100%                | 43%                  | 0.47                          | 0.79                           |
| <i>BCL11A</i>       | 189                                               | 16       | 0                          | 15                             | -                                   | 100%                | 73%                  | 0.76                          | 0.96                           |
| <i>ST6GAL1</i>      | 46                                                | 1        | 1                          | 19                             | -                                   | 100%                | 42%                  | 0.66                          | 0.92                           |
| <i>HNF1B</i>        | 40                                                | 2        | 4                          | 21                             | -                                   | 100%                | 48%                  | 0.80                          | 0.92                           |
| <i>ADCY5</i>        | 200                                               | 20       | 3                          | 22                             | -                                   | 100%                | 41%                  | 0.71                          | 0.86                           |
| <i>JAZF1</i>        | 171                                               | 13       | 2                          | 25                             | -                                   | 88%                 | 40%                  | 0.52                          | 0.80                           |
| <i>ADAMTS9</i>      | 133                                               | 8        | 0                          | 26                             | -                                   | 100%                | 62%                  | 0.49                          | 0.79                           |
| <i>TLE1</i>         | 185                                               | 18       | 1                          | 26                             | -                                   | 100%                | 42%                  | 0.86                          | 0.94                           |
| <i>GCK</i>          | 29                                                | 2        | 0                          | 28                             | -                                   | 100%                | 57%                  | 0.49                          | 0.61                           |
| <i>DUSP8</i>        | 110                                               | 10       | 4                          | 28                             | -                                   | 93%                 | 36%                  | 0.58                          | 0.81                           |
| <i>PROX1</i>        | 88                                                | 7        | 0                          | 29                             | -                                   | 93%                 | 59%                  | 0.57                          | 0.82                           |
| <i>BCAR1</i>        | 616                                               | 42       | 13                         | 30                             | -                                   | 90%                 | 10%                  | 0.66                          | 0.83                           |
| <i>ZMIZ1</i>        | 164                                               | 8        | 2                          | 33                             | -                                   | 100%                | 70%                  | 0.54                          | 0.82                           |
| <i>BCL2</i>         | 35                                                | 1        | 0                          | 35                             | -                                   | 97%                 | 69%                  | 0.56                          | 0.64                           |
| <i>KCNQ1_sig1</i>   | 83                                                | 2        | 35                         | 40                             | -                                   | 98%                 | 18%                  | 0.72                          | 0.76                           |
| <i>TSPAN8</i>       | 201                                               | 15       | 2                          | 41                             | -                                   | 95%                 | 54%                  | 0.73                          | 0.94                           |
| <i>SPRY2</i>        | 206                                               | 14       | 0                          | 42                             | -                                   | 95%                 | 43%                  | 0.54                          | 0.95                           |
| <i>LAMA1</i>        | 56                                                | 3        | 3                          | 45                             | -                                   | 96%                 | 62%                  | 0.25                          | 0.44                           |
| <i>ANK1</i>         | 176                                               | 17       | 0                          | 48                             | -                                   | 96%                 | 35%                  | 0.37                          | 0.65                           |
| <i>IGF2BP2</i>      | 121                                               | 11       | 1                          | 50                             | -                                   | 96%                 | 40%                  | 0.17                          | 0.29                           |

|                  |     |    |    |     |   |      |     |      |      |
|------------------|-----|----|----|-----|---|------|-----|------|------|
| <i>CENTD2</i>    | 311 | 23 | 4  | 53  | - | 94%  | 23% | 0.38 | 0.71 |
| <i>PTPRD</i>     | 55  | 5  | 1  | 54  | - | 96%  | 35% | 0.26 | 0.37 |
| <i>PRC1</i>      | 260 | 27 | 1  | 62  | 1 | 94%  | 45% | 0.32 | 0.50 |
| <i>HMGA2</i>     | 209 | 13 | 3  | 67  | - | 94%  | 48% | 0.38 | 0.68 |
| <i>LPP</i>       | 121 | 11 | 0  | 70  | - | 96%  | 49% | 0.71 | 0.79 |
| <i>SLC16A13</i>  | 78  | 5  | 10 | 71  | 5 | 99%  | 30% | 0.15 | 0.28 |
| <i>KLHDC5</i>    | 212 | 27 | 0  | 72  | - | 94%  | 26% | 0.28 | 0.48 |
| <i>CDC123</i>    | 170 | 16 | 7  | 74  | - | 99%  | 32% | 0.64 | 0.88 |
| <i>FTO</i>       | 144 | 4  | 1  | 80  | - | 100% | 41% | 0.30 | 0.48 |
| <i>MTNR1B</i>    | 91  | 7  | 1  | 81  | - | 93%  | 37% | 0.48 | 0.56 |
| <i>UBE2E2</i>    | 507 | 37 | 1  | 84  | - | 98%  | 30% | 0.37 | 0.68 |
| <i>IRS1</i>      | 403 | 37 | 0  | 90  | - | 99%  | 49% | 0.16 | 0.28 |
| <i>ARL15</i>     | 245 | 25 | 0  | 92  | - | 93%  | 28% | 0.10 | 0.18 |
| <i>KLF14</i>     | 98  | 8  | 1  | 93  | - | 98%  | 34% | 0.09 | 0.17 |
| <i>RASGRP1</i>   | 96  | 6  | 2  | 93  | - | 100% | 45% | 0.22 | 0.32 |
| <i>DGKB_prot</i> | 154 | 8  | 5  | 101 | - | 98%  | 53% | 0.17 | 0.31 |
| <i>C2CD4</i>     | 229 | 9  | 0  | 102 | - | 99%  | 60% | 0.18 | 0.31 |
| <i>MC4R_prot</i> | 146 | 12 | 17 | 107 | 1 | 98%  | 14% | 0.12 | 0.23 |
| <i>PAX4_prot</i> | 115 | 6  | 2  | 111 | - | 97%  | 31% | 0.14 | 0.23 |
| <i>TMEM154</i>   | 135 | 10 | 8  | 113 | - | 96%  | 53% | 0.28 | 0.39 |
| <i>KCNK16</i>    | 119 | 11 | 0  | 117 | 3 | 99%  | 49% | 0.11 | 0.20 |
| <i>PPARG</i>     | 306 | 28 | 1  | 123 | 1 | 95%  | 33% | 0.12 | 0.20 |
| <i>NOTCH2</i>    | 137 | 11 | 3  | 128 | 2 | 96%  | 52% | 0.24 | 0.30 |
| <i>HNF4A</i>     | 202 | 18 | 0  | 139 | - | 96%  | 34% | 0.74 | 0.85 |
| <i>GLIS3</i>     | 145 | 6  | 0  | 139 | - | 98%  | 57% | 0.19 | 0.30 |
| <i>ZFAND6</i>    | 165 | 15 | 0  | 144 | - | 97%  | 33% | 0.24 | 0.36 |
| <i>WFS1</i>      | 210 | 16 | 1  | 145 | 2 | 93%  | 39% | 0.24 | 0.36 |
| <i>GRK5</i>      | 148 | 14 | 0  | 146 | - | 97%  | 51% | 0.18 | 0.27 |
| <i>ANKRD55</i>   | 181 | 7  | 0  | 148 | - | 100% | 31% | 0.27 | 0.47 |
| <i>VPS26A</i>    | 152 | 12 | 0  | 150 | - | 97%  | 35% | 0.07 | 0.12 |
| <i>GIPR</i>      | 238 | 18 | 1  | 151 | 2 | 96%  | 21% | 0.82 | 0.83 |
| <i>AP3S2</i>     | 186 | 18 | 8  | 161 | - | 98%  | 39% | 0.15 | 0.25 |
| <i>DGKB_risk</i> | 199 | 13 | 3  | 166 | - | 97%  | 46% | 0.51 | 0.73 |
| <i>GRB14</i>     | 177 | 17 | 1  | 170 | 1 | 99%  | 51% | 0.19 | 0.34 |
| <i>PEPD</i>      | 316 | 30 | 0  | 194 | - | 98%  | 30% | 0.43 | 0.72 |
| <i>GPSM1</i>     | 223 | 17 | 26 | 220 | 5 | 96%  | 40% | 0.06 | 0.09 |

|                  |      |    |    |     |    |                 |     |      |      |
|------------------|------|----|----|-----|----|-----------------|-----|------|------|
| <i>TLE4</i>      | 326  | 21 | 13 | 224 | -  | 99%             | 50% | 0.19 | 0.32 |
| <i>MC4R_risk</i> | 388  | 33 | 0  | 250 | -  | 97%             | 50% | 0.10 | 0.19 |
| <i>RBMS1</i>     | 313  | 16 | 0  | 250 | -  | 97%             | 45% | 0.23 | 0.31 |
| <i>SSR1</i>      | 313  | 38 | 0  | 256 | 2  | 97%             | 22% | 0.10 | 0.19 |
| <i>CTBP1</i>     | 279  | 20 | 23 | 263 | 1  | 95%             | 13% | 0.15 | 0.26 |
| <i>MACF1</i>     | 429  | 37 | 8  | 305 | 1  | 94%             | 30% | 0.13 | 0.18 |
| <i>HMG20A</i>    | 955  | 68 | 0  | 319 | -  | 97%             | 44% | 0.10 | 0.17 |
| <i>THADA</i>     | 592  | 41 | 5  | 319 | 3  | 97%             | 39% | 0.07 | 0.12 |
| <i>HNFA1</i>     | 516  | 45 | 1  | 366 | 3  | 95%             | 35% | 0.42 | 0.56 |
| <i>KCNJ11</i>    | 528  | 50 | 1  | 398 | 4  | 96%             | 36% | 0.52 | 0.75 |
| <i>MPHOSPH9</i>  | 477  | 39 | 57 | 437 | 1  | 96%             | 32% | 0.03 | 0.05 |
| <i>ZFAND3</i>    | 466  | 44 | 6  | 447 | -  | 99%             | 25% | 0.09 | 0.12 |
| <i>GCKR</i>      | 468  | 51 | 1  | 451 | 8  | 96%             | 43% | 0.24 | 0.27 |
| <i>SRR</i>       | 463  | 34 | 0  | 457 | 5  | 98%             | 43% | 0.11 | 0.14 |
| <i>TP53INP1</i>  | 696  | 53 | 0  | 502 | -  | 97%             | 36% | 0.16 | 0.24 |
| <i>FAF1</i>      | 839  | 75 | 10 | 773 | 1  | 97%             | 18% | 0.19 | 0.20 |
| <i>TMEM163</i>   | 887  | 83 | 37 | 835 | 1  | 96%             | 43% | 0.20 | 0.28 |
| <i>PAX4_risk</i> | 857  | 87 | 0  | 844 | 1  | 96%             | 49% | 0.03 | 0.05 |
| <i>POU5F1</i>    | 1782 | 74 | 1  | 993 | 14 | 96%             | 37% | 0.24 | 0.30 |
|                  |      |    |    |     |    | <b>Averages</b> | 97% | 41%  |      |

**Supplementary Figure 29 | Trans-ethnic principal component analysis for exome-sequence samples.** African American studies (N=2,074): Jackson Heart Study (AJ) and Wake Forest School of Medicine Study (AW); East Asian studies (N=2,165): Korea Association Research Project (EK) and Singapore Diabetes Cohort Study and Singapore Prospective Study Program (ES); Hispanic studies (N=1,943): San Antonio Family Heart Study (HA) and Starr County (HS); South Asian studies (N=2,217): London Life Sciences Population Study (SL) and Singapore Indian Eye study (SS); and European studies (N=4,541): Ashkenazi (UA), Metabolic Syndrome in Men Study (UM), and GoT2D study (GO). A total of 10,348 independent QC passed, autosomal variants (trans-ethnic  $r^2 < 0.05$ ) with MAF > 1% in all ancestry groups were considered for constructing axes of genetic variation through principal components analysis implemented in EIGENSTRAT to identify ethnic outliers.

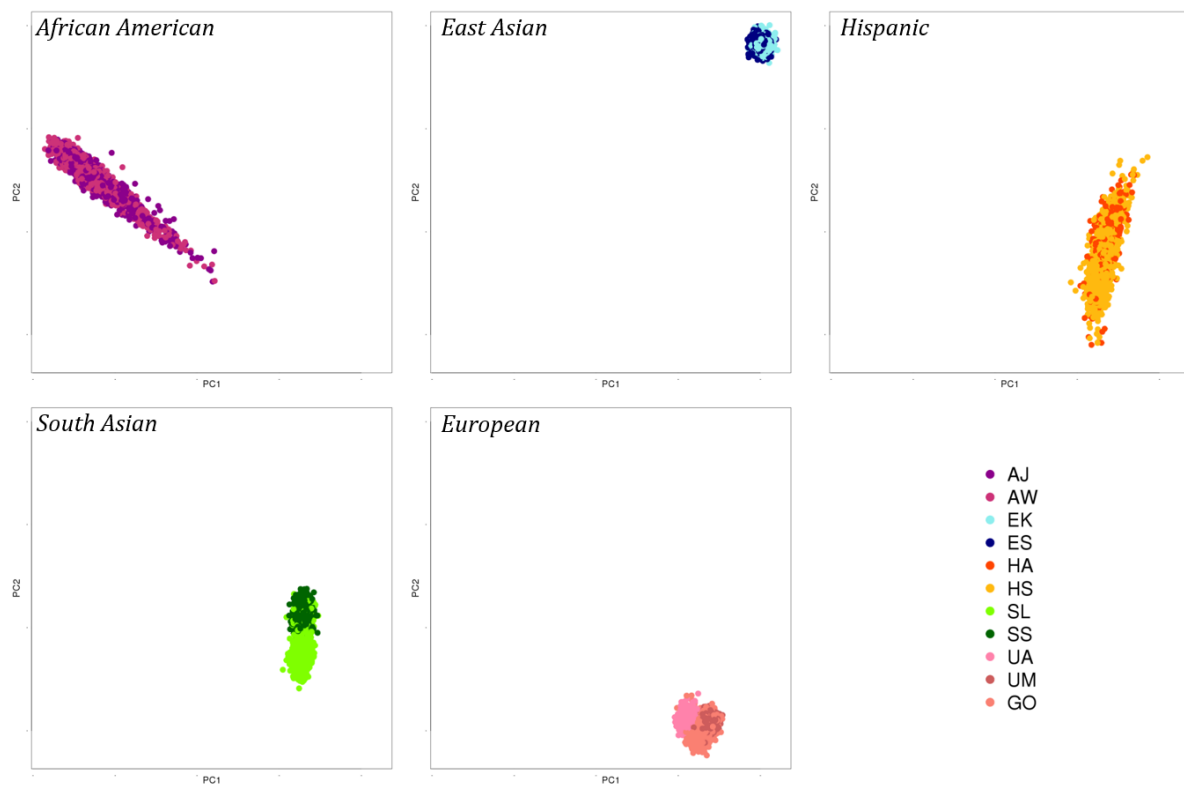

**Supplementary Table 30 | Summary of samples and adjustments for EMMAX and WALD single-variant association analysis for 12,940 exome-sequence samples.** Genomic control inflation factors ( $\lambda$ ) were calculated on the basis of independent autosomal variants with MAF>1% within each ancestry group.

| Ancestry group   | EMMAX |           | WALD  |                         |           |
|------------------|-------|-----------|-------|-------------------------|-----------|
|                  | N     | $\lambda$ | N     | PCs used for adjustment | $\lambda$ |
| African American | 2,074 | 1.00      | 2,025 | PC1                     | 1.01      |
| East Asian       | 2,165 | 1.02      | 2,164 | PC1                     | 1.02      |
| European         | 4,541 | 0.99      | 4,518 | PC1 - PC4               | 1.07      |
| Hispanic         | 1,943 | 1.00      | 1,938 | PC1 - PC4               | 1.03      |
| South Asian      | 2,217 | 1.03      | 2,199 | PC1                     | 1.05      |

N: total number of samples. PC: principal component.

Supplementary Figure 31 | Global ancestry estimates for 1,943 Hispanic samples.

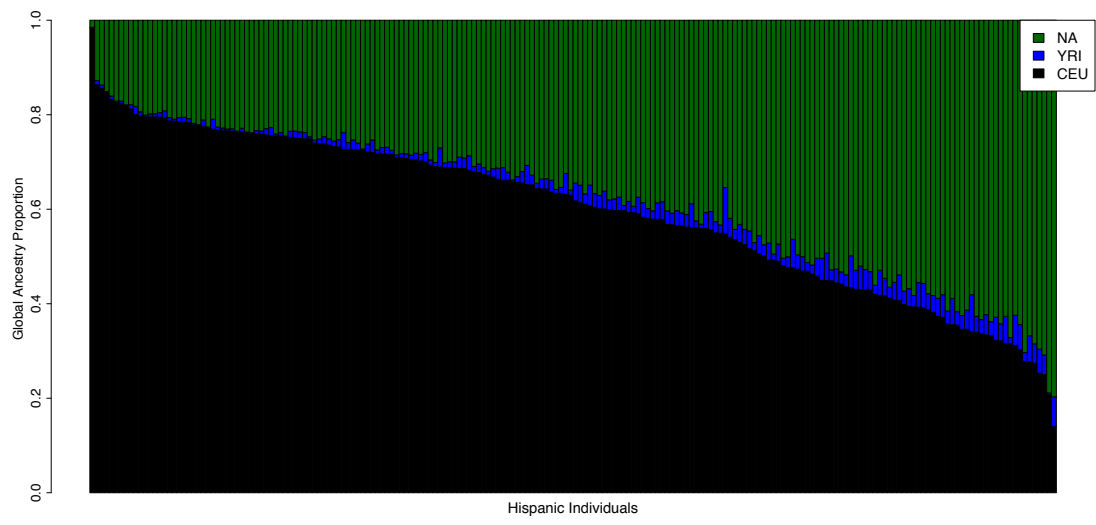

Supplementary Table 32 | Premium gene sets

|                                                                               |                                                                               |                                                                                                                                                                                                                                                                                                                                                                                                                                                                                                                                                                                                                                                                                                                                                                                                                                                                                                                                                                                                                                                                                                                                                                                                                                                                                                                                                                                                                                                                                                                                                |
|-------------------------------------------------------------------------------|-------------------------------------------------------------------------------|------------------------------------------------------------------------------------------------------------------------------------------------------------------------------------------------------------------------------------------------------------------------------------------------------------------------------------------------------------------------------------------------------------------------------------------------------------------------------------------------------------------------------------------------------------------------------------------------------------------------------------------------------------------------------------------------------------------------------------------------------------------------------------------------------------------------------------------------------------------------------------------------------------------------------------------------------------------------------------------------------------------------------------------------------------------------------------------------------------------------------------------------------------------------------------------------------------------------------------------------------------------------------------------------------------------------------------------------------------------------------------------------------------------------------------------------------------------------------------------------------------------------------------------------|
| Diabetes_McGill_Adipomyocytokines                                             | Diabetes_McGill_Adipomyocytokines                                             | ADIPOQ AGT APLN AZGP1 C3 FGF21 IL10 IL13 IL1B IL6 IL8 LEP CCL2 MIF NAMPT RETN TGFBI TNF VEGFA                                                                                                                                                                                                                                                                                                                                                                                                                                                                                                                                                                                                                                                                                                                                                                                                                                                                                                                                                                                                                                                                                                                                                                                                                                                                                                                                                                                                                                                  |
| Diabetes_McGill_Adiponectin_Pathway                                           | Diabetes_McGill_Adiponectin_Pathway                                           | ACACA ACACB ADIPOQ ADIPOR1 ADIPOR2 APPL1 SLC2A4 PRKAA1 PRKAA2 PRKAB1 PRKAB2 PRKAG1 PRKAG2 PRKAG3 RAB5A STK11                                                                                                                                                                                                                                                                                                                                                                                                                                                                                                                                                                                                                                                                                                                                                                                                                                                                                                                                                                                                                                                                                                                                                                                                                                                                                                                                                                                                                                   |
| Diabetes_McGill_Beta_cell_GPCRs                                               | Diabetes_McGill_Beta_cell_GPCRs                                               | GPR119 ADRB2 ADRA2A MTNR1A MTNR1B HTR2B HTR1D CHRM3 SSTR2 GLP1R FFAR1 GCGR ADRB1 GIPR FFAR3 FFAR2 O3FAR1 ADCYAP1R1 VIPR2 NPY1R GHRSR KISS1R CCKAR CNR1 P2RY12 ADRA2B                                                                                                                                                                                                                                                                                                                                                                                                                                                                                                                                                                                                                                                                                                                                                                                                                                                                                                                                                                                                                                                                                                                                                                                                                                                                                                                                                                           |
| Diabetes_McGill_Calcium-influx_pathway_Katp-independent_and_dependent         | Diabetes_McGill_Calcium-influx_pathway_Katp-independent_and_dependent         | ABCC8 KCNJ11 SSTR2 SSTR3 KCNJ3 KCNJ6 NALCN CACNA1H CACNA1D CACNA1A CACNA1C CACNA1E SCN8A SCN9A SCN1B SCN3B KCNMA1 KCNB1 KCNB2 KCNQ1 KCNH2 KCNJ12 KCNJ15 KCNN3 KCNN4 KCNN1 RYR2 ITPR1 ITPR2 ITPR3 CLCN3                                                                                                                                                                                                                                                                                                                                                                                                                                                                                                                                                                                                                                                                                                                                                                                                                                                                                                                                                                                                                                                                                                                                                                                                                                                                                                                                         |
| Diabetes_McGill_Cell_cycle_All_Genes                                          | Diabetes_McGill_Cell_cycle_All_Genes                                          | CCND1 CCND2 CCND3 CDK4 CDK6 RB1 RBL1 RBL2 ABL1 HDAC1 HDAC2 E2F1 E2F2 E2F3 E2F4 E2F5 TFDP1 TFDP2 GSK3B TGFBI TGFBI2 TGFBI3 SMAD2 SMAD3 SMAD4 MYC ZBTB17 CDKN2A CDKN2B CDKN2C CDKN2D CDKN1B CDKN1C CDKN1A CCNE1 CCNE2 CDK2 SKP1 CUL1 RBX1 SKP2 CCNA2 CCNA1 CDC6 CDC45 CDC7 DBF4 CDK1 CCNB1 CCNB2 CCNB3 CDC25B CDC25C YWHAZ YWHAB YWHAQ YWHAH YWHAA YWHAAH YWHAG PLK1 WEE1 WEE2 PKMYT1 CNHN CDK7 ANAPC1 ANAPC2 CDC27 ANAPC4 ANAPC5 CDC16 ANAPC7 CDC23 ANAPC10 ANAPC11 CDC26 ANAPC13 CDC20 PTTG1 PTTG2 ESPL1 SMC1A SMC1B SMC3 STAG2 STAG1 RAD21 TTK BUB1 BUB3 BUB1B MAD1L1 MAD2L1 MAD2L2 FZR1 CDC14B CDC14A ATR ATM TP53 CHEK1 CHEK2 CREBBP EP300 PRKDC MDM2 GADD45A GADD45B GADD45G PCNA SFN CDC25A ORC1 ORC2 ORC3 ORC4 ORC5 ORC6 MCM2 MCM3 MCM4 MCM5 MCM6 MCM7                                                                                                                                                                                                                                                                                                                                                                                                                                                                                                                                                                                                                                                                                                                                                                                   |
| Diabetes_McGill_Cell_cycle_G1_S                                               | Diabetes_McGill_Cell_cycle_G1_S                                               | ABL1 ATM ATR CCNA1 CCND1 CCNE1 CDC25A CDK1 CDK2 CDK4 CDK6 CDKN1A CDKN1B CDKN2A CDKN2B DHFR E2F1 GSK3B HDAC1 RB1 SKP2 SMAD3 SMAD4 TFDP1 TGFBI TGFBI2 TGFBI3 TP53                                                                                                                                                                                                                                                                                                                                                                                                                                                                                                                                                                                                                                                                                                                                                                                                                                                                                                                                                                                                                                                                                                                                                                                                                                                                                                                                                                                |
| Diabetes_McGill_CREBBP_coTF                                                   | Diabetes_McGill_CREBBP_coTF                                                   | SREBF1 IRF9 KLF5 SERTAD1 AC091153.1 NCOA2 TDG FHL2 ZBTB2 RBBP4 ONECUT1 PLAGL1 VDR HDAC3 EBF1 ACVR1 CSNK2A1P HOXB4 NCOA6 NCOA3 SPIB HOXB7 RELA HOXA11 IKBKGM MAML2 IFNAR2 CCNC CREM GPBP1 IRF7 ZBTB17 CRX RUVBL1 SOX9 FGFR1 EWSR1 SMARCB1 RPS6KA5 FOXO1 MAML3 KAT2A AP1B1 TP53 NFIX SS18L1 HOXB1 HLF H3F3A DDX5 CUX1 RUNX1 GABPA SRF CDC25B MSH6 SREBF2 TP73 MED6 CREBBP STAT4 NFATC4 ABCC9 NMI PROX1 HMGA1 ATF1 MED1 MAF GAK HOXA10 POU2F3 CHUK SERTAD2 CDK8 IKBK RARA SMAD1 EIF2B1 SMARCA4 CITED4 NPAS2 KLF13 CNOT3 HDAC1 CITED2 MYBL2 MED21 GMEB1 TCF7L2 RXRG CTBP1 KLF4 UBTFL NLK PIAS1 SERTAD3 NKX2-1 XRCC6 CEBPB KAT5 NAP1L1 HTT BRCA1 MAML1 EGR1 TAF7L RBPJ KHDRBS1 MDC1 ALX1 TGS1 RPA2 MED24 RPS6KA1 FOS PHOX2A PIAS3 MDM2 HNF1A ZNF639 ELK1 FOXM1 ETS2 MTDH CRTCC NUP98 HOXA9 HIF1A ING1 PCMT1 AIRE SUV39H1 TCF3 PPARGC1A RPS6KA3 GMEB2 CDX2 ATF4 ETS1 KAT2B TRERF1 SND1 SH3GL1 PAX5 NCOA1 CREB1 TCF12 EP300 HSF1 DAXX TRIP10 HIPK2 AR PPARG NOTCH1 HOXD4 E2F3 POLR2A NOTCH3 MAST1 JUN CENPJ NFE2L2 RXRA N4BP2 DACH1 PPARA SMAD4 SRCAP CTNNB1 SMAD3 POU1F1 MYOD1 NEUROG1 NFATC2 PRKCD STAT2 H3F3B SNW1 MGMT MYBL1 MLL KLF1 STAT1 TRIM21 GATA1 HOXD10 MYC MECOM RBCK1 THRA CSNK2A2 DHX9 CDH2 NR3C1 E2F1 ATF3 PRRX2 E2F5 WRB NFE2 ESR1 CDKN1A KPNA2 MED15 YWHAH NOTCH2 GLI3 RPS6KA2 MYB HNF1B HNF4A CSK NFIA SPI1 AP2A2 MSH2 CARM1 TACC2 GTF2B HOXB2 RBBP7 MBD2 WT1 HOXB3 IRF3 HOXB6 FOXO4 ATF2 NOTCH4 HOXB9 STAT1 HMX3 STAT5A MSX1 GCM1 STAT5B GATA2 SMAD2 ABCA1 STAT6 CITED1 BCL3 MCM7 CDK5RAP3 CAMK4 PML SNIP1 TRIP4 TRAM2 ACTA2 MAFG |
| Diabetes_McGill_ER_Stress                                                     | Diabetes_McGill_ER_Stress                                                     | EIF2AK3 ERN1 ATF6 CCDC88B EIF2S1 XBP1 ATF4 ATF5 PPP1R15A DDIT3 BCL2 MAPK8 MBTPS1 MBTPS2 ATF6B NROB2 DERL1 UCHL1 EIF2AK4 EIF2AK1 EIF2AK2 SYVN1 WFS1 HSPA5 ATP2A2 PDX1 MAFA SEC61A1 SEC61A2 SEC61B SEC61G SIAH1 SIAH2                                                                                                                                                                                                                                                                                                                                                                                                                                                                                                                                                                                                                                                                                                                                                                                                                                                                                                                                                                                                                                                                                                                                                                                                                                                                                                                            |
| Diabetes_McGill_Inflammatory_Cytokines                                        | Diabetes_McGill_Inflammatory_Cytokines                                        | AGT GPR77 CCR2 CCR5 CD74 CHUK CRADD CXCR1 CXCR2 CXCR3 CXCR4 ECSIT FADD FGF21 FGFR1 FGFR2 FGFR3 IKBK IKBKE IKBK IL10 IL10RA IL10RB IL13 IL13RA1 IL13RA2 IL1B IL1R1 IL6 IL6R IL6ST IL8 IRAK1 IRAK2 JAK1 JAK2 JAK3 KDR KLB LAP3 LTBP1 LTBP2 LTBP4 MADD MAP2K1 MAP2K2 MAP3K1 MAP3K14 MAP4K1 MAPK14 MAPK8 CCL2 NAMPT NFKB1 NFKBIA NMNAT1 NMNAT2 NMNAT3 PIK3C2A PIK3C2B PIK3CA RHOA RIPK1 RIPK2 RIPK3 RIPK4 SHC1 SHC2 SIRT1 SIRT2 SIRT3 SIRT4 SIRT5 SIRT6 SIRT7 SMAD2 SMAD3 SMAD4 SMAD6 SMAD7 STAT3 TAB1 MAP3K7 TGFBI TGFBI2 TGFBI3 LEFTY2 TGFBR1 TGFBR2 TNF TNFRSF1A TNFRSF1B TOLLIP TRADD TRAF2 TRAF6 TYK2 VEGFA XIAP                                                                                                                                                                                                                                                                                                                                                                                                                                                                                                                                                                                                                                                                                                                                                                                                                                                                                                                              |
| Diabetes_McGill_Insulin                                                       | Diabetes_McGill_Insulin                                                       | STX1A STX1B SNAP25 VAMP2 SYT7 SYT5 SENP1 ATF6 XBP1 ERN1 EIF2AK3 ATF4 EIF2A                                                                                                                                                                                                                                                                                                                                                                                                                                                                                                                                                                                                                                                                                                                                                                                                                                                                                                                                                                                                                                                                                                                                                                                                                                                                                                                                                                                                                                                                     |
| Diabetes_McGill_Leptin_Pathway                                                | Diabetes_McGill_Leptin_Pathway                                                | MAPK1 MAPK3 GRB2 IRS1 JAK1 JAK2 LEP LEPR PTPN11 SOCS3 STAT3 STAT5A                                                                                                                                                                                                                                                                                                                                                                                                                                                                                                                                                                                                                                                                                                                                                                                                                                                                                                                                                                                                                                                                                                                                                                                                                                                                                                                                                                                                                                                                             |
| Diabetes_McGill_Mtor_pathway                                                  | Diabetes_McGill_Mtor_pathway                                                  | AKT1 EIF3A EIF4A1 EIF4A2 EIF4B EIF4E EIF4EBP1 EIF4G1 EIF4G2 EIF4G3 FKBP1A MKNK1 MTOR PDK2 PDPK1 PIK3CA PIK3R1 PPP2CA PTEN RPS6 RPS6KB1 TSC1 TSC2                                                                                                                                                                                                                                                                                                                                                                                                                                                                                                                                                                                                                                                                                                                                                                                                                                                                                                                                                                                                                                                                                                                                                                                                                                                                                                                                                                                               |
| Diabetes_McGill_RAS                                                           | Diabetes_McGill_RAS                                                           | DIRAS1 DIRAS2 DIRAS3 ERAS GEM HRAS KRAS MRAS NKIRAS1 NKIRAS2 NRAS RALA RALB RAP1A RAP1B RAP2A RAP2B RAP2C RASD1 RASD2 RASL10A RASL10B RASL11A RASL11B RASL12 REM1 REM2 RERG RERGL RRAD RRAS RRAS2 RASSF1 RASSF2 RASSF3 RASSF4 RASSF5 RASSF6 RASSF7 RASSF8 RASSF9 RASSF10                                                                                                                                                                                                                                                                                                                                                                                                                                                                                                                                                                                                                                                                                                                                                                                                                                                                                                                                                                                                                                                                                                                                                                                                                                                                       |
| Diabetes_McGill_Triggering_pathway_mediating_stimulation_of_insulin_secretion | Diabetes_McGill_Triggering_pathway_mediating_stimulation_of_insulin_secretion | SLC2A1 SLC2A3 GCK PKLR PKM2 DLAT DLD PDHA1 PDHB PDHX PDP1 CS ACO1 ACO2 IDH2 OGDH DLST SUCLA2 SUCLG1 SUCLG2 SDHA SDHB SDHC SDHD FH MDH1 MDH2                                                                                                                                                                                                                                                                                                                                                                                                                                                                                                                                                                                                                                                                                                                                                                                                                                                                                                                                                                                                                                                                                                                                                                                                                                                                                                                                                                                                    |
| Diabetes_McGill_Wnt_pathway                                                   | Diabetes_McGill_Wnt_pathway                                                   | APC AXIN1 BTRC CCND1 CREBBP CSNK1A1 CSNK1D CSNK2A1 CTBP1 CTNNB1 DVL1 FRAT1 FZD1 GSK3B HDAC1 LEF1 MAP3K7 MYC NLK PPARD PPP2CA SMAD4 TAB1 TLE1 WIF1 WNT1                                                                                                                                                                                                                                                                                                                                                                                                                                                                                                                                                                                                                                                                                                                                                                                                                                                                                                                                                                                                                                                                                                                                                                                                                                                                                                                                                                                         |
| Mendelian_Blood_Disease                                                       | Mendelian_Blood_Disease                                                       | ITGB2 FERMT3 SLC35C1 HBA1 HBA2 HBB RPL11 RPL35A RPL26 RPL5 RPS10 RPS17 RPS17L RPS19 RPS24 RPS26 RPS7                                                                                                                                                                                                                                                                                                                                                                                                                                                                                                                                                                                                                                                                                                                                                                                                                                                                                                                                                                                                                                                                                                                                                                                                                                                                                                                                                                                                                                           |
| Mendelian_Cerebral_Degeneration_Due_to_Generalized_Lipidoses                  | Mendelian_Cerebral_Degeneration_Due_to_Generalized_Lipidoses                  | GLA NPC1 NPC2 SMPD1 GBA SLC37A4 GAA AGL PYGM PHKA1 PHKA2 PHKB PHKG2 LAMP2 PGAM2                                                                                                                                                                                                                                                                                                                                                                                                                                                                                                                                                                                                                                                                                                                                                                                                                                                                                                                                                                                                                                                                                                                                                                                                                                                                                                                                                                                                                                                                |
| Mendelian_Disorders_of_Copper_Metabolism                                      | Mendelian_Disorders_of_Copper_Metabolism                                      | ATP7A ATP7B PRNP                                                                                                                                                                                                                                                                                                                                                                                                                                                                                                                                                                                                                                                                                                                                                                                                                                                                                                                                                                                                                                                                                                                                                                                                                                                                                                                                                                                                                                                                                                                               |
| Mendelian_Disorders_of_Fatty_Acid_Oxidation                                   | Mendelian_Disorders_of_Fatty_Acid_Oxidation                                   | ETFA ETFB ETFDH CPT2 ACADSB ACADVL CPT1A HADHA SLC25A20 ACADM                                                                                                                                                                                                                                                                                                                                                                                                                                                                                                                                                                                                                                                                                                                                                                                                                                                                                                                                                                                                                                                                                                                                                                                                                                                                                                                                                                                                                                                                                  |



|                                            |                                            |                                                                                                                                                                                           |
|--------------------------------------------|--------------------------------------------|-------------------------------------------------------------------------------------------------------------------------------------------------------------------------------------------|
| Mendelian_Etc                              | Mendelian_Etc                              | HTT GFAP ARSA PSAP GALC SCN9A FXN MEFV SAA1 AR MEN1 RET                                                                                                                                   |
| Mendelian_Hereditary_Sensory_Neuropathy    | Mendelian_Hereditary_Sensory_Neuropathy    | NTRK1 PMP22 MPZ LITAF EGR2 NEFL MFN2 KIF1B RAB7A LMNA TRPV4 BSCL2 GARS HSPB1 GDAP1 HSPB8 DNM2 MTMR2 SBF2 SH3TC2 NDRG1 PRX FGD4 FIG4 YARS GJB1 PRPS1 MED25 INF2 KARS                       |
| Mendelian_Immune                           | Mendelian_Immune                           | AIRE CD40LG FAS FASLG CYBB CYBA NCF1 NCF2 NCF4                                                                                                                                            |
| Mendelian_Long_QT_syndrome                 | Mendelian_Long_QT_syndrome                 | KCNQ1 KCNH2 KCNE1 KCNE2 CACNA1C CAV3 SCN5A SCN4B                                                                                                                                          |
| Mendelian_Metabolism                       | Mendelian_Metabolism                       | SLC22A5 APRT HPRT1 UMPS SLC25A15 NAGS CPS1 ASS1 ASL ARG1 CLCN5 DMP1 ENPP1 FGF23 PHEX SLC34A3 CYP27B1 ABCA1 APOA1 LPL APOB MTTP SAR1B LCAT GCDH PSPH DHTKD1 AHCY GNMT MAT1A GATM GLDC G6PD |
| Mendelian_Severe_Combined_Immunodeficiency | Mendelian_Severe_Combined_Immunodeficiency | IL2RG JAK3 ADA RAG1 RAG2 ZAP70 PNP NHEJ1 IL7R CD3D DCLRE1C PTPRC RFX5 RFXANK RFXAP AK2 CIITA                                                                                              |

## Author contributions

**Sample Collection And Phenotyping (WholeGenomes):** L.L.B., J. Fadista, C. Herder, C.J.G., H.A.K., L.K., J. Kravic, V.L., C. Ladenvall, W.R., N.N., M.R., A. Swift, P.N., B.T., C. Meisinger, A.P., C. Huth, J. Tuomilehto, R.M.W., R.N.B., K.S.S., C.G., K.R.O., K. Strauch, T.T., A.T.H., F.S.C., T.D.S., T.M.F., N.P.B., K.L.M., L.G., M.B., D. Altshuler, M.I.M.

**Sample Collection And Phenotyping (GWAS Imputation):** C.F., H.C., M.M.-N., R.A.S., B.B., H.B., V.G., O.G., P.K., Y.L., C.N., D. Palli, D.R., D.T., Y.T.v.d.S., C. Ladenvall, E.M., A.-C.S., E.P.B., C. Langenberg, P. Froguel, R.J.F.L., A. Metspalu, N.J.W., E.I., T.I., P.W.F., R.M., L. Lind, J.B.M., L.J.S., M.B., D. Altshuler, M.I.M.

**Sample Collection And Phenotyping (Whole Exomes):** J.E.B., N.B., B.-G.H., C.P.J., T.K., J. Kuusisto, M.C.Y.N., N.D.P., A. Stančáková, H.E.A., U.A., D. Aguilar, R.A., T.A., E.C., C.-Y.C., A.C., J.E.C., V.S.F., S.P.F., B.I.F., M.G., D.E.H., P.J.H., C.-C.K., S.K., B.L., W.Y.L., J. Liu, M. Loh, S.K.M., S. Puppala, W.R.S., S.-T.T., H.A.T.Jr, F.T., G.W.Sr, T.Y.W., J.C.L., M.M., L.L.B., J. Fadista, G.L.S., C.J.G., L.K., D.H., J. Kravic, C. Ladenvall, N.N., A. Swift, P.N., S.P.O'R., J. Tuomilehto, Y.S.C., K.S.C., D.M.L., T.I.P., K.S.S., R.A.D., B.G., M.W., J.S.K., J.-Y.L., A.T.H., D.W.B., G. Atzmon, J.C.C., T.D.S., M. Laakso, G.I.B., J.B., R.D., E.S.T., C.L.H., J.G.W., T.M.F., N.J.C., L.G., M.B., D. Altshuler, M.I.M.

**Sample Collection And Phenotyping (Exome Array & Replication):** A. Mahajan, N.R.R., N.W.R., N.G., R.A.S., J.H., D. Pasko, T.V.V., S.-H.K., K.S.P., J.C.L., M.M., G.L.S., C.J.G., J.B.-J., I. Brandslund, C.C., A.S.F.D., T.E., A.J.F., L.H., D.H., J. Kravic, M. Hollensted, M.E.J., T.J., C. Ladenvall, J.M.J., A. Käräjämäki, L. Lannfelt, T.L., A.L., O.M., L. Milani, M.N., M.O.-M., L.Q., Q.Q., M.R., O.R., A.H.R., K. Stirrups, A.R.W., E.M., M.H.d.A., P. Deloukas, B.T., T.H., C. Meisinger, F.B.H., B.I., F.K., L. Liang, A.P., S.P.O'R., C.N.A.P., O.P., R.R., V.S., A.-C.S., R.N.B., C. Langenberg, K.S.S., A. Metspalu, N.J.W., M.W., C.G., E.I., T.I., P.W.F., R.M., L. Lind, K.R.O., K. Strauch, T.T., A.D.M., A.T.H., F.S.C., T.D.S., T.M.F., L.G., A.P.M., M.I.M.

**Design And Study Supervision:** C.F., T. Fingerlin, C. Hu, C.P.J., H.E.A., D. Prabhakaran, J.S., P.R.N., M.H.d.A., T.H., O.P., J. Tuomilehto, R.M.W., D. Bharadwaj, Y.S.C., G.R.C., J.C.N.C., K.S.C., M.J.D., S.B.E., P.E., K.A.J., D.M.L., W.J., R.C.W.M., T.I.P., M. Sandhu, N.T., P. Froguel, I. Barroso, Y.Y.T., E.Z., R.A.D., B.G., I.P., A.L.G., J.S.K., J.-Y.L., T.P., P. Donnelly, A.D.M., A.T.H., D.W.B., G. Atzmon, J.C.C., M. Laakso, T.M.S., G.I.B., J.B., R.D., E.S.T., G.M., C.L.H., J.G.W., M. Seielstad, T.M.F., J.B.M., N.J.C., R.S., E.S.L., N.P.B., K.L.M., T.M., L.G., G. Abecasis, J.C.F., L.J.S.,

A.P.M., M.B., D. Altshuler, M.I.M.

**Data Production:** J. Flannick, K.J.G., P. Fontanillas, M. Hollensted, J.M.J., C.B., J. Maguire, R.P., K. Shakir, T. Fennell, M.D., J. Murphy, R.O., J.S.R., H.G., E.B., G.B., J. Trakalo, D. Buck, Y.F., T.M.S., E.S.L., S.G., N.P.B., T.M.

**Variant Calling And Panel Generation:** C.F., J. Flannick, A. Mahajan, K.J.G., P. Fontanillas, M.A.R., X.S., N.R.R., N.W.R., P.S.C., C. Hartl, A.U.J., J.R.H., R.D.P., A. Kumar, M.M.-N., N.G., H.M.S., M.L.S., S.C.J.P., J.C., G.G., J.D.S., B.M.N., S. Purcell, T.S., T.W., J.B.-J., J. Kriebel, M.O.C., J. Maguire, R.P., K. Shakir, M.D., A.P.G., G.J., J. Murphy, R.O., J.S.R., E.B., Y.F., T.M.S., N.P.B., T.M., H.M.K., M.B., M.I.M.

**Statistical Analysis:** C.F., J. Flannick, T.M.T., A. Mahajan, V.A., K.J.G., C. Ma, P. Fontanillas, L. Moutsianas, D.J.M., M.A.R., J.R.B.P., X.S., T.W.B., N.R.R., N.W.R., P. Cingolani, A.E.L., J.F.T., H.M.H., J. Dupuis, P.S.C., C.M.L., C. Hartl, A.U.J., H.C., J.R.H., M.v.d.B., R.D.P., A. Kumar, M.M.-N., N.G., H.M.S., E.R.G., Jaehoon Lee, Y.C., R.A.S., J.E.B., P. Chen, J.H., M.J.G., D. Pasko, T.V.V., T.G., N.L.B., A.G.D.-W., T. Ferreira, M. Horikoshi, I.H., M.K.I., B.-J.K., Y.K., Y.J.K., M.-S.K., Juyoung Lee, S.L., K.-H.L., T.J.M., Y.N., X.W., R.P.W., J.Y., W. Zhang, N.B., B.F.V., B.-G.H., T.K., J. Kuusisto, A. Manning, M.C.Y.N., N.D.P., B.B., A. Stančáková, A.S.B., J.M.M.H., H.M.L., Y.L., W. Zhao, J. Danesh, V.K.L.L., D.S., W.Y.S., C.H.T.T., L.Y., C. Ladenvall, J.C.N.C., C. Langenberg, R.C.W.M., T.I.P., R.J.F.L., J.S.R., N.J.W., E.I., H.K.I., P.W.F., I.P., R.M., K. Strauch, J.B.M., R.S., N.P.B., K.L.M., G. Abecasis, L.J.S., A.P.M., H.M.K., M.B., D. Altshuler, M.I.M.

**Drafting Of Manuscript:** C.F., J. Flannick, T.M.T., A. Mahajan, V.A., K.J.G., P. Fontanillas, L. Moutsianas, D.J.M., M.A.R., J.R.B.P., P. Cingolani, N.J.C., R.S., N.P.B., L.J.S., A.P.M., H.M.K., M.B., D. Altshuler, M.I.M.

**Project Leadership:** M.B., D. Altshuler, M.I.M.

## **Acknowledgements (By Lead Institution)**

### **Albert Einstein College of Medicine, USA**

#### **Funders of this work:**

- The American Federation for Aging Research
- The Einstein Glenn Center
- National Institute on Aging (PO1AG027734, R01AG046949, 1R01AG042188, P30AG038072)

### **Broad Institute, USA**

#### **Funders of this work:**

- NHGRI (“Large Scale Sequencing and Analysis of Genomes” U54HG003067)
- NIDDK (“Multiethnic Study of Type 2 Diabetes Genes” U01DK085526)
- NIH (“Low-Pass Sequencing and High Density SNP Genotyping in Type 2 Diabetes” 1RC2DK088389)

#### **Personal support:**

- Vineeta Agarwala: National Institute of General Medical Sciences award (T32GM007753)

### **Center for Genome Science, National Institute of Health, Republic of Korea**

#### **Funders of this work:**

- Korea National Institute of Health (2012-N73002-00)
- Korea National Institute of Health and Korea Centers for Disease Control and Prevention (4845-301)

#### **Other acknowledgements:**

- This study was provided with biospecimens and data from the Korean Genome Analysis Project (4845-301), the Korean Genome and Epidemiology Study (4851-302), and the Korea Biobank Project (4851-307, KBP-2013-11 and KBP-2014-68) that were supported by the Korea Centers for Disease Control and Prevention, Republic of Korea.

### **The Chinese University of Hong Kong**

#### **Funders of this work:**

- The Focused Investment Scheme of the Chinese University of Hong Kong
- The Hong Kong Foundation for Research and Development in Diabetes established under the auspices of the Chinese University of Hong Kong
- Hong Kong Governments Research Grant Committee Central Allocation Scheme (CUHK 1/04C)
- The Innovation and Technology Fund (ITS/487/09FP, ITS/130/11)
- The Honk Kong Research Grants Council Theme-based Research Scheme (T12-402/13N)

### **German Diabetes Center, Germany**

#### **Funders of this work:**

- Ministry of Science and Research of the State of North Rhine-Westphalia (MIWF NRW)
- German Federal Ministry of Health (BMG)
- Grant from the German Federal Ministry of Education and Research (BMBF)

## **GoT2D consortium**

### **Funders of this work:**

- National Institutes of Health (“Low-Pass Sequencing and High-Density SNP Genotyping for Type 2 Diabetes” RC2DK088389)
- The German Center for Diabetes Research (DZD)

## **Hallym University Chuncheon, Republic of Korea**

### **Funders of this work:**

- National Research Foundation of Korea (NRF-2012R1A2A1A03006155)

## **Helmholtz Zentrum München – German Research Center for Environmental Health, Germany**

### **Funders of this work:**

- The German Center for Diabetes Research (DZD)
- Helmholtz Zentrum München (German Research Center for Environmental Health), which is supported by the German Federal Ministry of Education and Research (BMBF) and by the State of Bavaria
- The Munich Center of Health Sciences (MC-Health), Ludwig-Maximilians-Universität, as part of LMUinnovativ

### **Other acknowledgements:**

- The KORA research platform (KORA, Cooperative Research in the Region of Augsburg) was initiated and financed by the Helmholtz Zentrum München - German Research Center for Environmental Health, which is funded by the German Federal Ministry of Education and Research and by the State of Bavaria. Furthermore, KORA research was supported within the Munich Center of Health Sciences (MC Health), Ludwig-Maximilians-Universität, as part of LMUinnovativ.

## **Imperial College London, UK**

### **Funders of this work:**

- Action on Hearing Loss (G51)
- The British Heart Foundation (SP/04/002)
- European Union FP7 (EpiMigrant, 279143)
- Medical Research Council (G0601966, G0700931)
- MRC-PHE Centre for Environment and Health
- The National Institute for Health Research (NIHR) (RP-PG-0407-10371)
- NIHR Biomedical Research Centre at Imperial College Health Care NHS Trust
- NIHR Health Protection Research Unit on Health Impact of Environmental Hazards
- The Wellcome Trust (084723)

### **Personal Support**

- Paul Elliot: NIHR Senior Investigator

### **Other acknowledgements:**

- The LOLIPOP study is supported by the National Institute for Health Research (NIHR) Comprehensive Biomedical Research Centre Imperial College Healthcare NHS Trust. The work was carried out in part at the NIHR/Wellcome Trust Imperial Clinical Research Facility. We thank the participants and research staff who made the study possible.

### **The Jackson Heart Study, USA**

#### **Funders of this work:**

- National Heart, Lung, and Blood Institute and the National Institute on Minority Health and Health Disparities (HHSN268201300046C, HHSN268201300047C, HHSN268201300048C, HHSN268201300049C, HHSN268201300050C)

### **The Jackson Laboratory for Genomic Medicine, USA**

#### **Funders of this work:**

- National Institutes of Health (R00DK092251)

### **King's College, London**

#### **Funders of this work:**

- European Community's Seventh Framework Programme (FP7/2007-2013)
- National Institute for Health Research (NIHR)- funded BioResource, Clinical Research Facility and Biomedical Research Centre based at Guy's and St Thomas' NHS Foundation Trust in partnership with King's College London
- The Wellcome Trust

### **Lund University, Sweden**

#### **Funders of this work:**

- The Academy of Finland (263401, 267882)
- European Research Council Advanced Research Grant
- The Folkhälsan Research Foundation
- Novo Nordisk
- The Pålssons Foundation
- The Sigrid Juselius Foundation
- The Skåne Regional Health Authority
- The Swedish Heart-Lung Foundation
- Swedish Research Council (Linné and Strategic Research Grant)

### **Massachusetts General Hospital, USA**

#### **Funders of this work:**

- National Institutes of Health (U01DK085526)

#### **Personal support:**

- Jose Florez: MGH Research Scholar
- James B Meigs: National Institutes of Health (K24DK080140)

### **McGill University, Canada**

#### **Funders of this work:**

- The Canadian Institutes of Health Research

#### **Personal support:**

- Rob Sladek: Chercheur Boursier award from the Fonds de la Recherche en Santé du Québec; New Investigator Award from the Canadian Institutes of Health Research

### **National Institute for Health and Welfare, Helsinki, Finland**

#### **Funders of this work:**

- The Academy of Finland (139635)
- The Finnish Foundation for Cardiovascular Research

## **National University of Singapore**

### **Funders of this work:**

- Biomedical Research Council (BMRC) Individual Research Grant
- National Medical Research Council (NMRC) Individual Research Grant
- NMRC Centre Grant

### **Personal support:**

- Ching-Yu Cheng: NMRC Clinician Scientist award
- E Shyong Tai: NMRC Clinician Scientist award
- YY Teo: National Research Foundation Fellowship
- TY Wong: NMRC Singapore Translational Research Investigator award

## **Seoul National University, Republic of Korea**

### **Funders of this work:**

- Korea Health Technology R&D Project through the Korea Health Industry Development Institute (KHIDI), funded by the Ministry of Health & Welfare, Republic of Korea (HI14C0060)
- National Research Foundation of Korea (NRF) grants (2012R1A3A2026438, 2013M3A9C4078158, 2008-0062618)

## **T2D-GENES and GoT2D consortium**

### **Funders of this work:**

- National Institutes of Health (“Multiethnic Study of Type 2 Diabetes Genes” U01s DK085526, DK085501, DK085524, DK085545, DK085584; “Low-Pass Sequencing and High-Density SNP Genotyping for Type 2 Diabetes” DK088389)
- The German Center for Diabetes Research (DZD)

## **University of Bergen, Norway**

### **Funders of this work:**

- European Research Council (ERC-2011-ADG\_20110310 #293574)
- The KG Jebsen Foundation
- Research Council of Norway
- University of Bergen
- The Western Norway Regional Health Authority (Helse Vest)

## **University of Chicago, USA**

### **Funders of this work:**

- National Institute of Diabetes and Digestive and Kidney Diseases (NIDDK) (P30DK020595)
- National Institutes of Health (R01MH101820, P60DK20595, U01DK085501, R01HL102830, U01HG005773, R01MH090937)

### **Personal support:**

- Hae Kyung Im: National Cancer Institute (K12CA139160) awarded by the Institute of Translational Medicine at the University of Chicago

### **Other acknowledgements:**

- The content of this manuscript is solely the responsibility of the authors and does not necessarily represent the official views of the National Cancer Institute or the National Institutes of Health.

## **University of Cambridge, UK**

### **Funders of this work:**

- UK Medical Research Council (G0800270)
- British Heart Foundation (SP/09/002)
- European Research Council (268834)
- European Union Framework Programme 7 (HEALTH-F2-2012-279233)
- National Institute for Health Research, Cambridge Biomedical Research Centre
- Merck
- Pfizer

### **Personal support:**

- John Danesh: British Heart Foundation Professorship, NIHR Senior Investigator, European Research Council Senior Investigator.

## **University of Copenhagen**

### **Funders of this work:**

- The Lundbeck Foundation grant to LuCamp ([www.lucamp.org](http://www.lucamp.org))
- The Novo Nordisk Foundation Center for Basic Metabolic Research, an independent Research Center at the University of Copenhagen partially funded by an unrestricted donation from the Novo Nordisk Foundation

## **University of Eastern Finland**

### **Funders of this work:**

- The Academy of Finland
- Strategic Research Funding from the University of Eastern Finland, Kuopio, Finland

## **University of Helsinki, Finland**

### **Personal support:**

Heikki A Koistinen: Academy of Finland Clinical Researcher

## **University of Michigan, USA**

### **Funders of this work:**

- National Institutes of Health (R01DK062370, R01DK098032, RC2DK088389)

## **University of North Carolina, USA**

### **Funders of this work:**

- National Institutes of Health (DK072193, DK093757)

## **University of Oxford, UK**

### **Funders of this work:**

- The European Commission (ENGAGE: HEALTH-F4-2007-201413; Marie-Curie Fellowship PIEF-GA-2012-329156)
- MRC (G0601261, G0900747-91070)
- National Institutes of Health (RC2-DK088389, DK085545, DK098032)
- Wellcome Trust (064890, 083948, 085475, 086596, 090367, 090532, 092447, 095101, 095552, 098017, 098381, 100956)

### **Personal support:**

- Peter Donnelly: Wellcome Trust Senior Investigator
- Andrew Farmer: NIHR Senior Investigator



- Anna L Gloyn: Wellcome Trust Senior Fellow in Basic Biomedical Science
- Fredrik Karpe: NIHR Oxford Biomedical Research Centre; NIHR National Bioresource
- Cecilia Lindgren: Wellcome Trust Intermediate Research Fellow; Li Ka Shing Foundation
- Davis J McCarthy: General Sir John Monash Scholarship
- Mark I McCarthy: Wellcome Trust Senior Investigator; NIHR Senior Investigator
- Gilean McVean: Wellcome Trust Senior Investigator
- Andrew P Morris: Wellcome Trust Senior Fellow in Basic Biomedical Science
- Katharine R Owen: NIHR Clinician Scientist
- John R B Perry: Sir Henry Wellcome Postdoctoral Fellowship
- Manuel A Rivas: NDM Prize Studentship - Clarendon Award
- Juan Fernandez Tajes: Marie-Curie Fellow
- Martijn van de Bunt: NDM Prize Studentship

**Other acknowledgements:**

- We thank the High-Throughput Genomics Group at the Wellcome Trust Centre for Human Genetics for the generation of array and sequencing data.

**The University of Texas Health Science Center at Houston, USA**

**Funders of this work:**

- National Institutes of Health (U01DK085501, R01HL102830, R01DK073541)

**Uppsala University**

**Funders of this work:**

- The European Research Council
- The Knut och Alice Wallenberg Foundation
- The Swedish Heart-Lung Foundation (20140422)
- The Swedish Diabetes Foundation (2013-024)
- The Swedish Research Council (2012-1397)
- Uppsala University

**Wake Forest School of Medicine, USA**

**Funders of this work:**

- National Institutes of Health (R01DK066358)

**Wellcome Trust Sanger Institute, UK**

**Funders of this work:**

- National Institute for Health Research
- The Wellcome Trust (098051)

**Other acknowledgements:**

- Panos Deloukas's work forms part of the research themes contributing to the translational research portfolio of Barts Cardiovascular Biomedical Research Unit, which is supported and funded by the National Institute for Health Research.

**Studies**

**EGCUT** received financing from European Regional Development Fund, road-map grant no.3.2.0304.11-0312 and grant "Center of Excellence in Genomics (EXCEGEN). EGCUT studies were covered also by targeted financing from Estonian Government (IUT24-6, IUT20-60) and CTG grant (SP1GVARENG) from Development Fund of the University of Tartu.

**The Botnia study** has been financially supported by grants from the Sigrid Juselius Foundation,

Folkhälsan Research Foundation, Nordic Center of Excellence in Disease Genetics, an EU grant (EXGENESIS), Signe and Ane Gyllenberg Foundation, Swedish Cultural Foundation in Finland, Finnish Diabetes Research Foundation, Foundation for Life and Health in Finland, Finnish Medical Society, Paavo Nurmi Foundation, Helsinki University Central Hospital Research Foundation, Perklén Foundation, Ollqvist Foundation, Närpes Health Care Foundation and Ahokas Foundation. The study has also been supported by the Ministry of Education in Finland, Municipal Health Care Center and Hospital in Jakobstad and Health Care Centers in Vasa, Närpes and Korsholm.

**The Mount Sinai BioMe Biobank** has been financially supported The Andrea and Charles Bronfman Philanthropies.

#### **Other**

This study also utilized the high-performance computational capabilities of the Biowulf Linux cluster at the National Institutes of Health, Bethesda, Md. (<http://biowulf.nih.gov>).

## Current addresses

- David Altshuler: Vertex Pharmaceuticals, Boston, MA, USA
- Rector Arya, Ravindranath Duggirala, Vidya S Farook, Christopher P Jenkinson: South Texas Diabetes and Obesity Institute, Edinburg Regional Academic Health Center, University of Texas Rio Grande Valley, Edinburg, TX 78541, USA
- Dwaipayan Bharadwaj: School of Biotechnology, Jawaharlal Nehru University, New Delhi
- Giriraj Chandak: Centre for DNA Fingerprinting and Diagnostics (CDFD), Hyderabad, Telangana, India
- Nancy J Cox: Vanderbilt Genetics Institute, Vanderbilt University Medical Center, Nashville, TN, USA
- Aaron Day-Williams: Biogen, Boston, MA, USA
- Mark DePristo: Verily Life Sciences, Mountain View, CA 94043, USA
- Pierre Fontanillas: 23andMe, Mountain View, CA 94041, USA
- Eric R Gamazon: Division of Genetic Medicine, Vanderbilt University Medical Center, Nashville, TN, USA; Department of Clinical Epidemiology and Biostatistics and Department of Psychiatry, Academic Medical Center, University of Amsterdam, Amsterdam, The Netherlands
- Heather Highland: Department of Epidemiology, University of North Carolina at Chapel Hill, Chapel Hill, NC 27514, USA
- Jinyan Huang: State Key Laboratory of Medical Genomics, Shanghai Institute of Hematology, Rui Jin Hospital, Shanghai Jiao Tong University School of Medicine, Shanghai 200025, China
- Jeroen Hyghe: Public Health Sciences Division, Fred Hutchinson Cancer Research Center, Seattle, Washington 98109, USA
- Erik Ingelsson: Department of Medicine, Division of Cardiovascular Medicine, Stanford University School of Medicine, Stanford, California, USA
- Claes Ladenvall: Department of Immunology, Genetics and Pathology, Science for Life Laboratory, Uppsala University, Uppsala, Sweden
- Cecilia M Lindgren: The Big Data Institute at the Li Ka Shing Centre for Health Information and Discovery, University of Oxford, Oxford OX3 7BN, UK
- Jong-Young Lee: NGS Division/BIO R&D, 2nd Floor, B-dong, AICT Bldg., 145 Gwanggyo-ro, Yeongtong-gu, Suwon-si, Gyeonggi-do, 443-270 Republic of Korea
- Adam Locke: McDonnell Genome Institute, Washington University School of Medicine, St. Louis, MO, USA
- Marie Loh: Translational Laboratory in Genetic Medicine (TLGM), National University of Singapore (NUS) and A\*STAR, Singapore
- Clement Ma: Dana-Farber/Boston Children's Cancer and Blood Disorders Center, Boston, MA, USA
- Taylor J. Maxwell: Computational Biology Institute, The George Washington University, Ashburn, Virginia, USA.
- Loukas Moutsianas: Department of Human Genetics, Wellcome Trust Sanger Institute, Hinxton, Cambridgeshire, UK
- Lu Qi: Department of Epidemiology, School of Public Health and Tropical Medicine, Tulane University, New Orleans, LA, USA
- Xueling Sim: Saw Swee Hock School of Public Health, National University of Singapore, National University Health System, Singapore
- Kathleen Stirrups: Department of Haematology, University of Cambridge, Cambridge, UK
- Farook Thameem: Department of Biochemistry, Faculty of Medicine, Kuwait University, Kuwait
- Jaakko Tuomilehto: Dasman Diabetes Institute, Dasman, Kuwait
